# Supplementary material for: In-depth characterization of the cisplatin mutational signature in human cell lines and in esophageal and liver tumors
Source: PubMed Central journal article supplement — Genome Res. 2018 May;28(5):654–65. doi: 10.1101/gr.230219.117 (PMC5932606; doi:10.1101/gr.230219.117), 2018-05
Supplement: supp_gr.230219.117_Supplemental_Figs_and_Tables.pdf [file supp_gr.230219.117_Supplemental_Figs_and_Tables.pdf]

## Table of Contents

|                                         |    |
|-----------------------------------------|----|
| Supplemental_Fig_S01                    | 3  |
| MCF10A_cisplatin                        | 3  |
| MCF10A_genomes_flat                     | 4  |
| Supplemental_Fig_S02                    | 5  |
| 1536 plot MCF10A_Cis_1                  | 5  |
| 1536 plot MCF10A_Cis_2                  | 6  |
| 1536 plot MCF10A_Cis_3                  | 7  |
| 1536 plot MCF10A_Cis_4                  | 8  |
| 1536 plot MCF10A_Cis_5                  | 9  |
| 1536 plot MCF10A_Cis_6                  | 10 |
| Supplemental_Fig_S03                    | 15 |
| Supplemental_Fig_S04                    | 17 |
| Heptanucleotide context cisplatin       | 17 |
| C-A Heptanucleotide context             | 17 |
| C-G Heptanucleotide context             | 18 |
| C-T Heptanucleotide context             | 19 |
| T-A Heptanucleotide context             | 20 |
| T-C Heptanucleotide context             | 21 |
| T-G Heptanucleotide context             | 22 |
| Heptanucleotide context cisplatin_pvals | 23 |
| C-A Heptanucleotide context pvals       | 23 |
| C-G Heptanucleotide context pvals       | 24 |
| C-T Heptanucleotide context pvals       | 25 |
| T-A Heptanucleotide context pvals       | 26 |
| T-C Heptanucleotide context pvals       | 27 |
| T-G Heptanucleotide context pvals       | 28 |
| Supplemental_Fig_S05                    | 29 |
| MCF10A_cisplatin_inTranscript192        | 29 |
| MCF10A_genomes_flat_inTranscript192     | 30 |
| Supplemental_Fig_S06                    | 31 |
| Supplemental_Fig_S07                    | 32 |
| Supplemental_Fig_S08                    | 33 |
| Supplemental_Fig_S09                    | 34 |
| Supplemental_Fig_S10                    | 36 |
| dinucSeqContext_MCF10A_Cis_1            | 36 |
| dinucSeqContext_MCF10A_Cis_2            | 37 |
| dinucSeqContext_MCF10A_Cis_3            | 38 |
| dinucSeqContext_MCF10A_Cis_4            | 39 |
| dinucSeqContext_MCF10A_Cis_5            | 40 |
| dinucSeqContext_MCF10A_Cis_6            | 41 |
| Supplemental_Fig_S11                    | 46 |
| Supplemental_Fig_S12                    | 47 |
| dinuc seq context LUAD-E00934           | 47 |
| dinuc seq context LUAD-E01317           | 48 |
| dinuc seq context LUAD-S01405           | 49 |
| dinuc seq context MELA_0165             | 50 |

|                             |    |
|-----------------------------|----|
| dinuc seq context MELA_0247 | 51 |
| dinuc seq context MELA_0255 | 52 |
| Supplemental_Fig_S13        | 53 |
| Supplemental_Fig_S14        | 55 |
| Supplemental_Fig_S15        | 56 |
| Supplemental_Fig_S16        | 57 |
| Supplemental_Fig_S17        | 59 |
| page1                       | 59 |
| page2                       | 60 |
| page3                       | 61 |
| page4                       | 62 |
| page5                       | 63 |
| page6                       | 64 |
| Supplemental_Fig_S18        | 65 |
| Supplemental_Fig_S19        | 66 |
| Supplemental_Fig_S20        | 67 |
| Supplemental_Fig_S21        | 69 |
| Supplemental_Fig_S22        | 71 |
| Supplemental_Fig_S23        | 72 |
| Supplemental_Fig_S24        | 73 |
| Supplemental_Fig_S25        | 74 |
| dinuc exposures ESAD_6      | 75 |
| dinuc spectra_ESAD_6        | 74 |
| Supplemental_Fig_S26        | 76 |
| dinuc exposures ESAD_6      | 77 |
| dinuc spectra_ESAD_6        | 76 |
| Supplemental_Fig_S27        | 78 |
| Supplemental_Fig_S28        | 79 |
| Supplemental_Fig_S29        | 80 |
| Supplemental_Fig_S30        | 81 |
| Supplemental_Fig_S31        | 82 |
| Supplemental_Fig_S32        | 83 |
| Supplemental_Table_S1       | 84 |
| Supplemental_Table_S2       | 85 |
| Supplemental_Table_S3       | 88 |
| Supplemental_Table_S4       | 90 |





Supplemental Fig. S2: Pentanucleotide sequence contexts for all cisplatin treated MCF 10A clones (A-F) and HepG2 (G-J) clones, normalized for pentanucleotide occurrence in the genome.

Supplemental Fig. S2A: Pentanucleotide context in MCF-10A\_Cis\_1

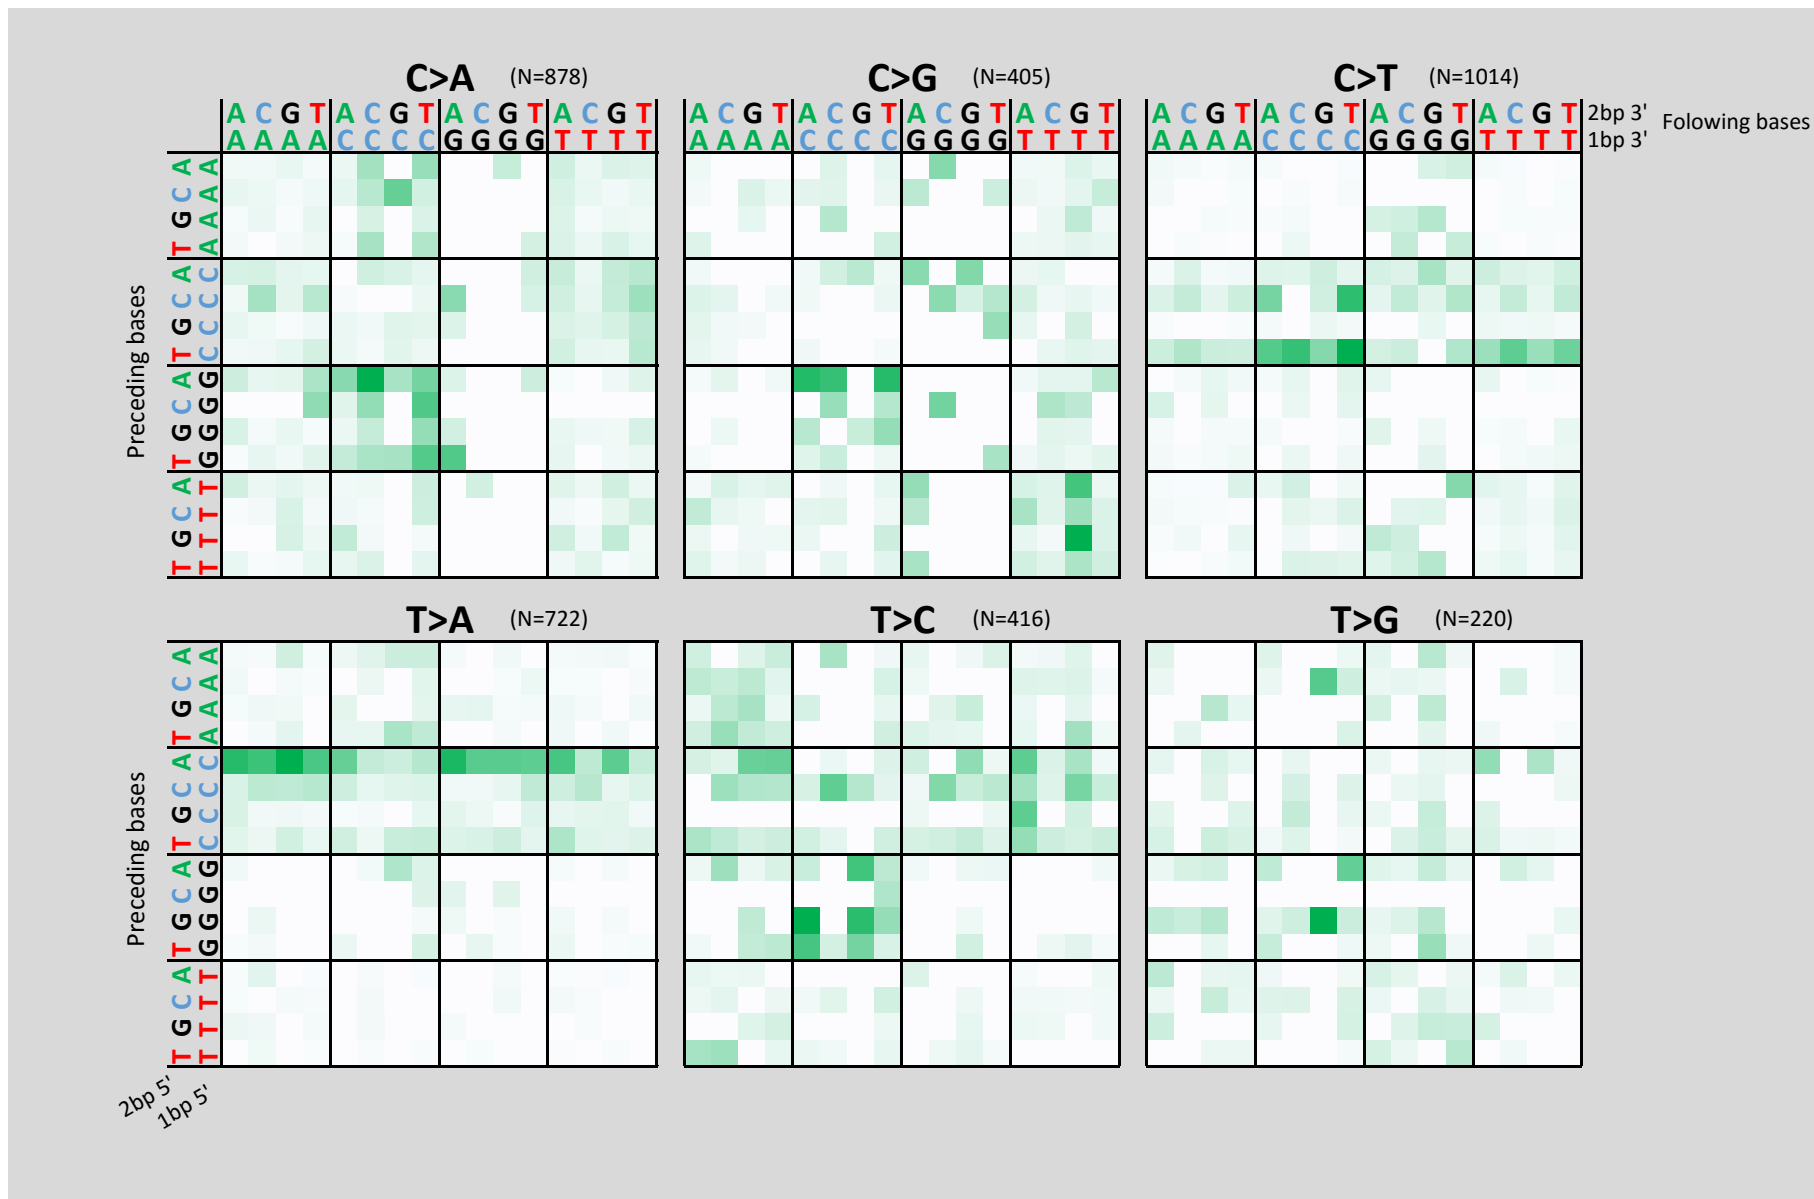

Supplemental Fig. S2B: Pentanucleotide context in MCF-10A\_Cis\_2

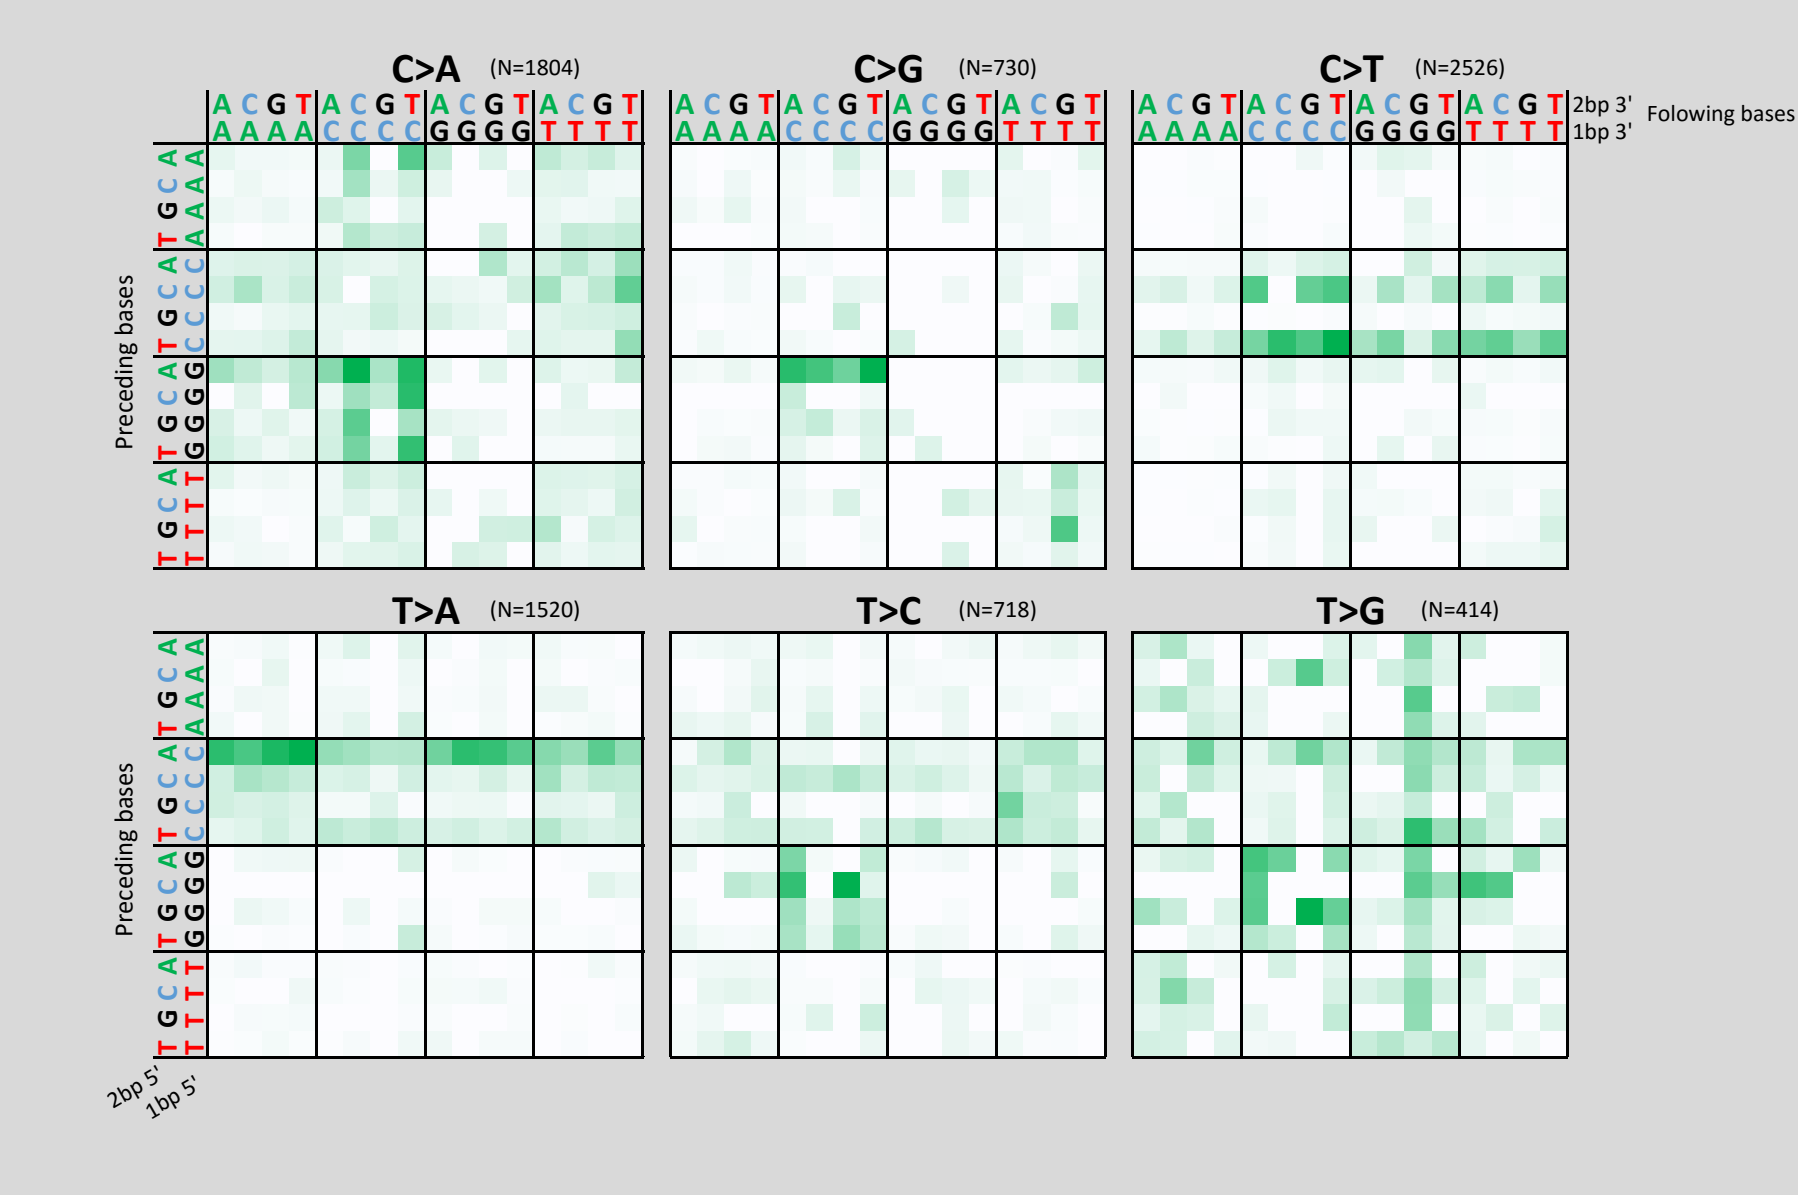

Supplemental Fig. S2C: Pentanucleotide context in MCF-10A\_Cis\_3

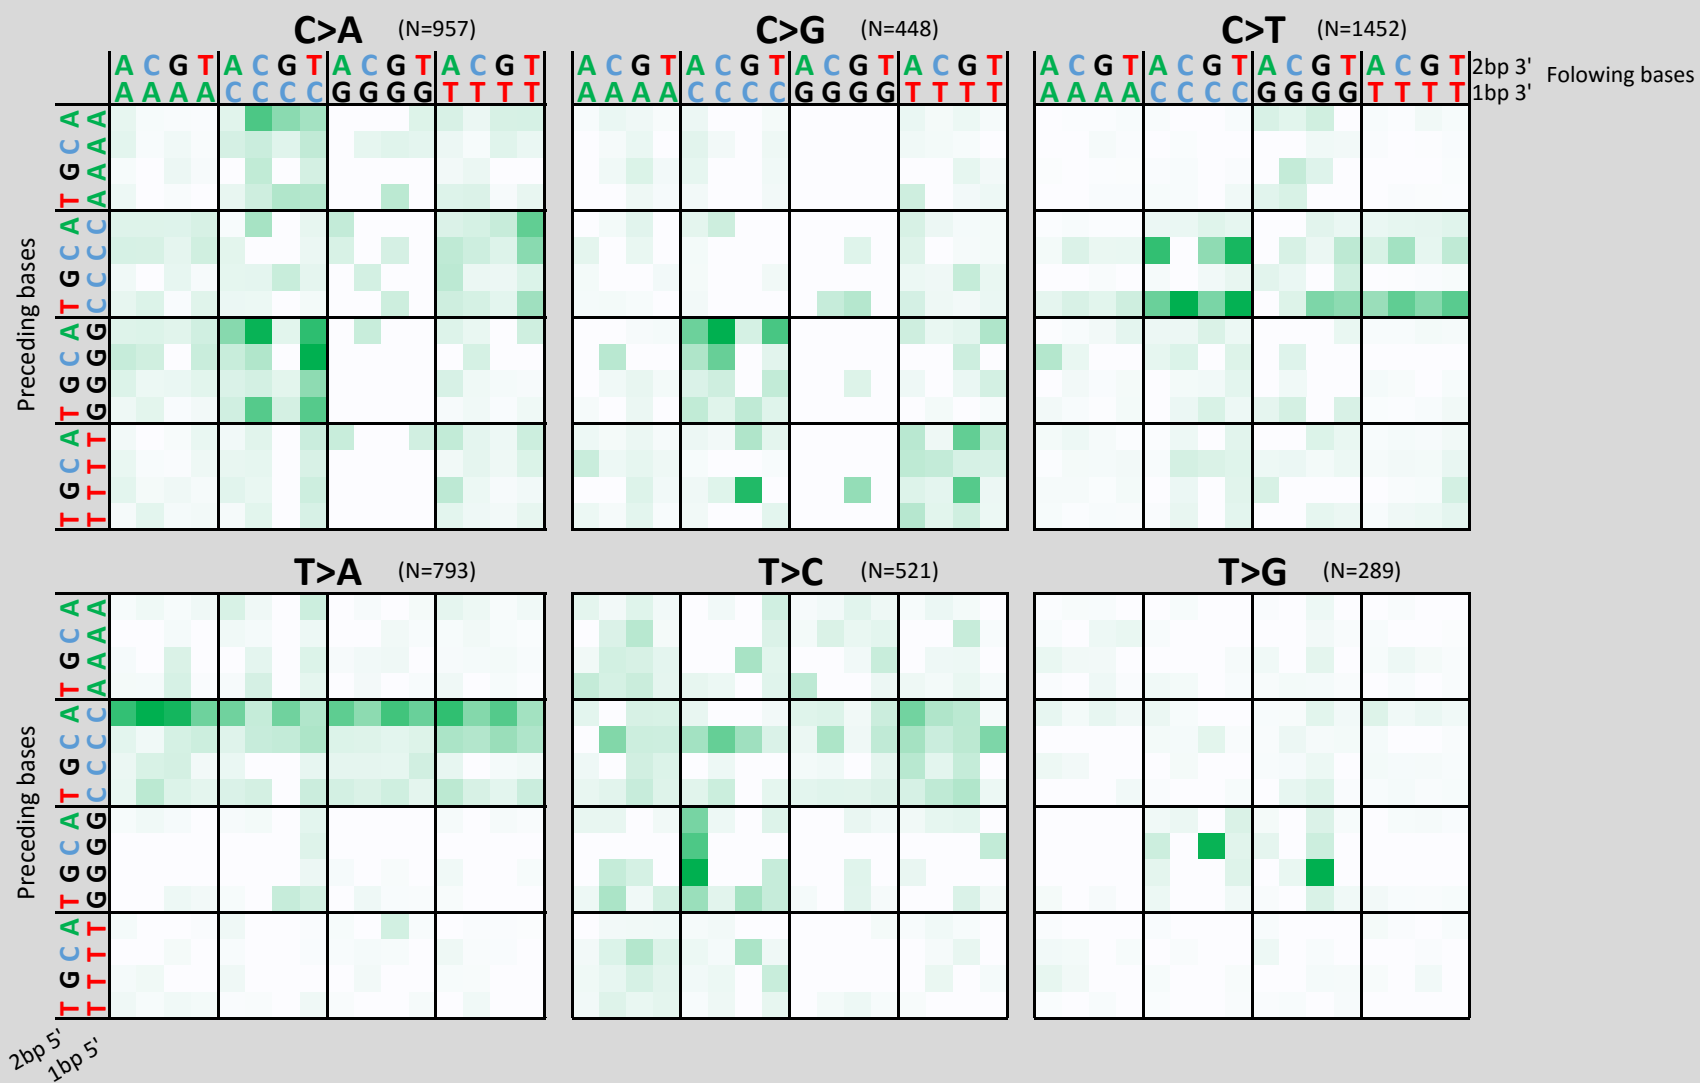





Supplemental Fig. S2E: Pentanucleotide context in MCF-10A\_Cis\_5

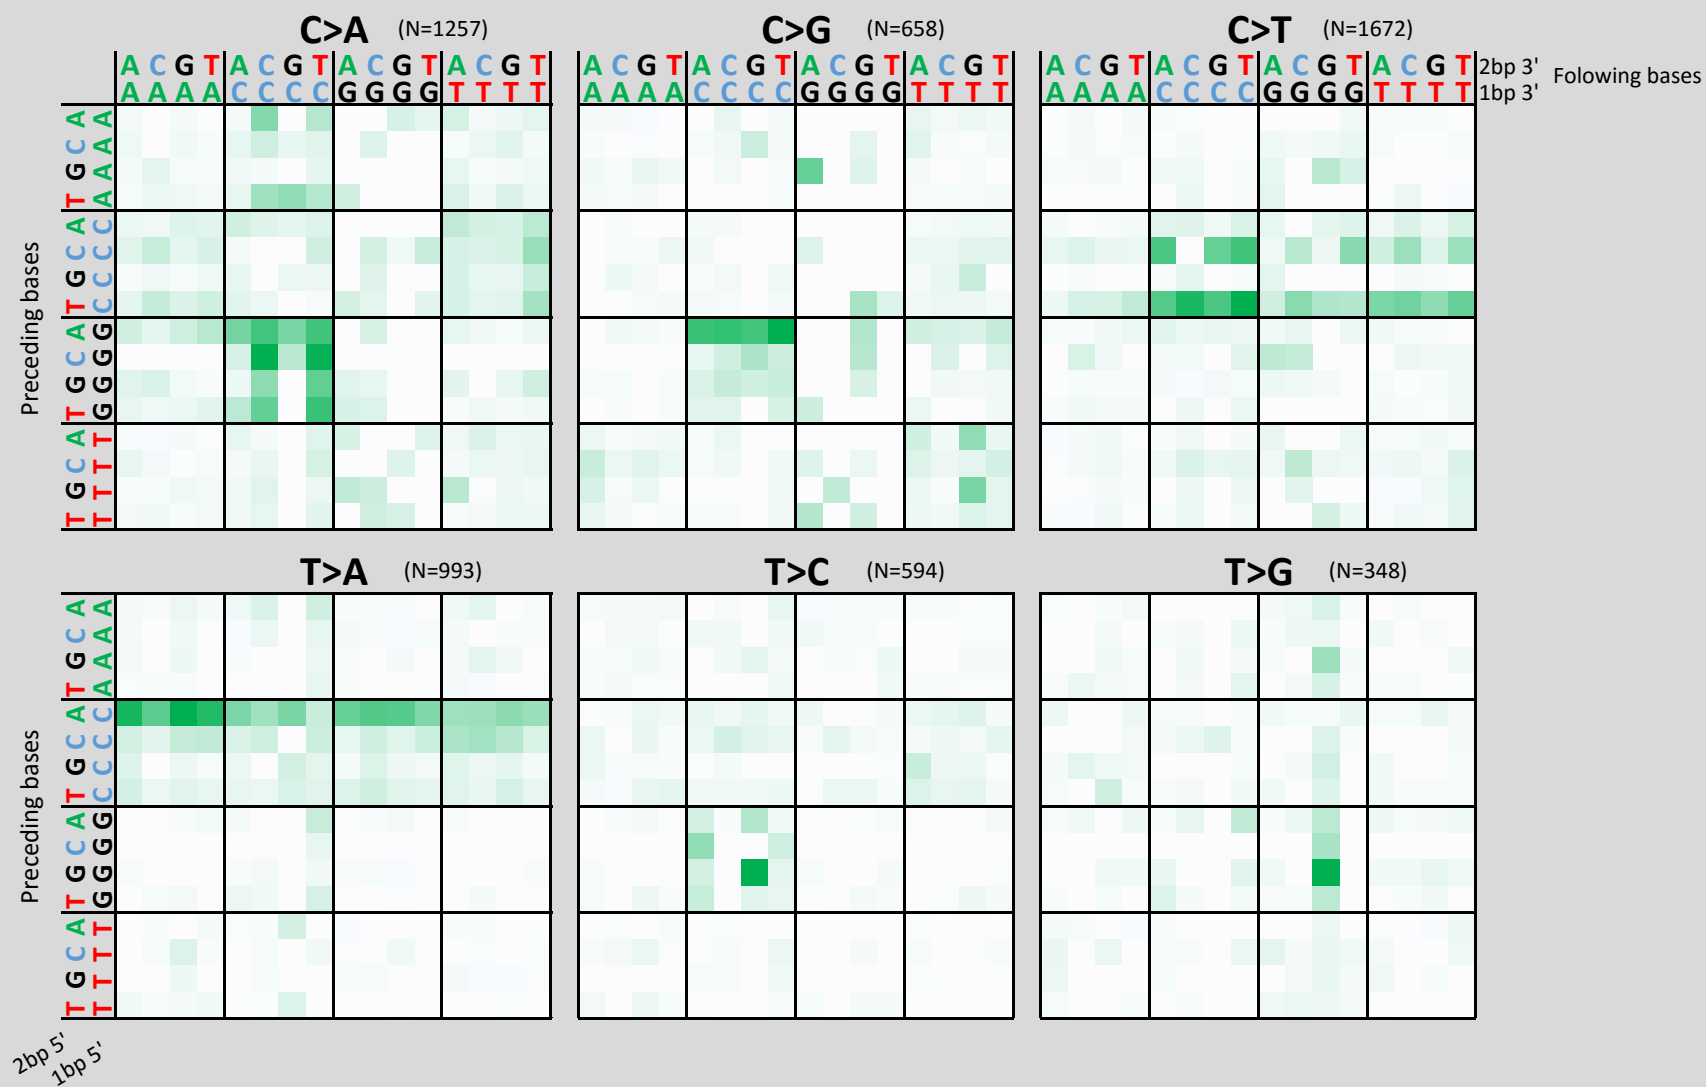

Supplemental Fig. S2F: Pentanucleotide context in MCF-10A\_Cis\_6

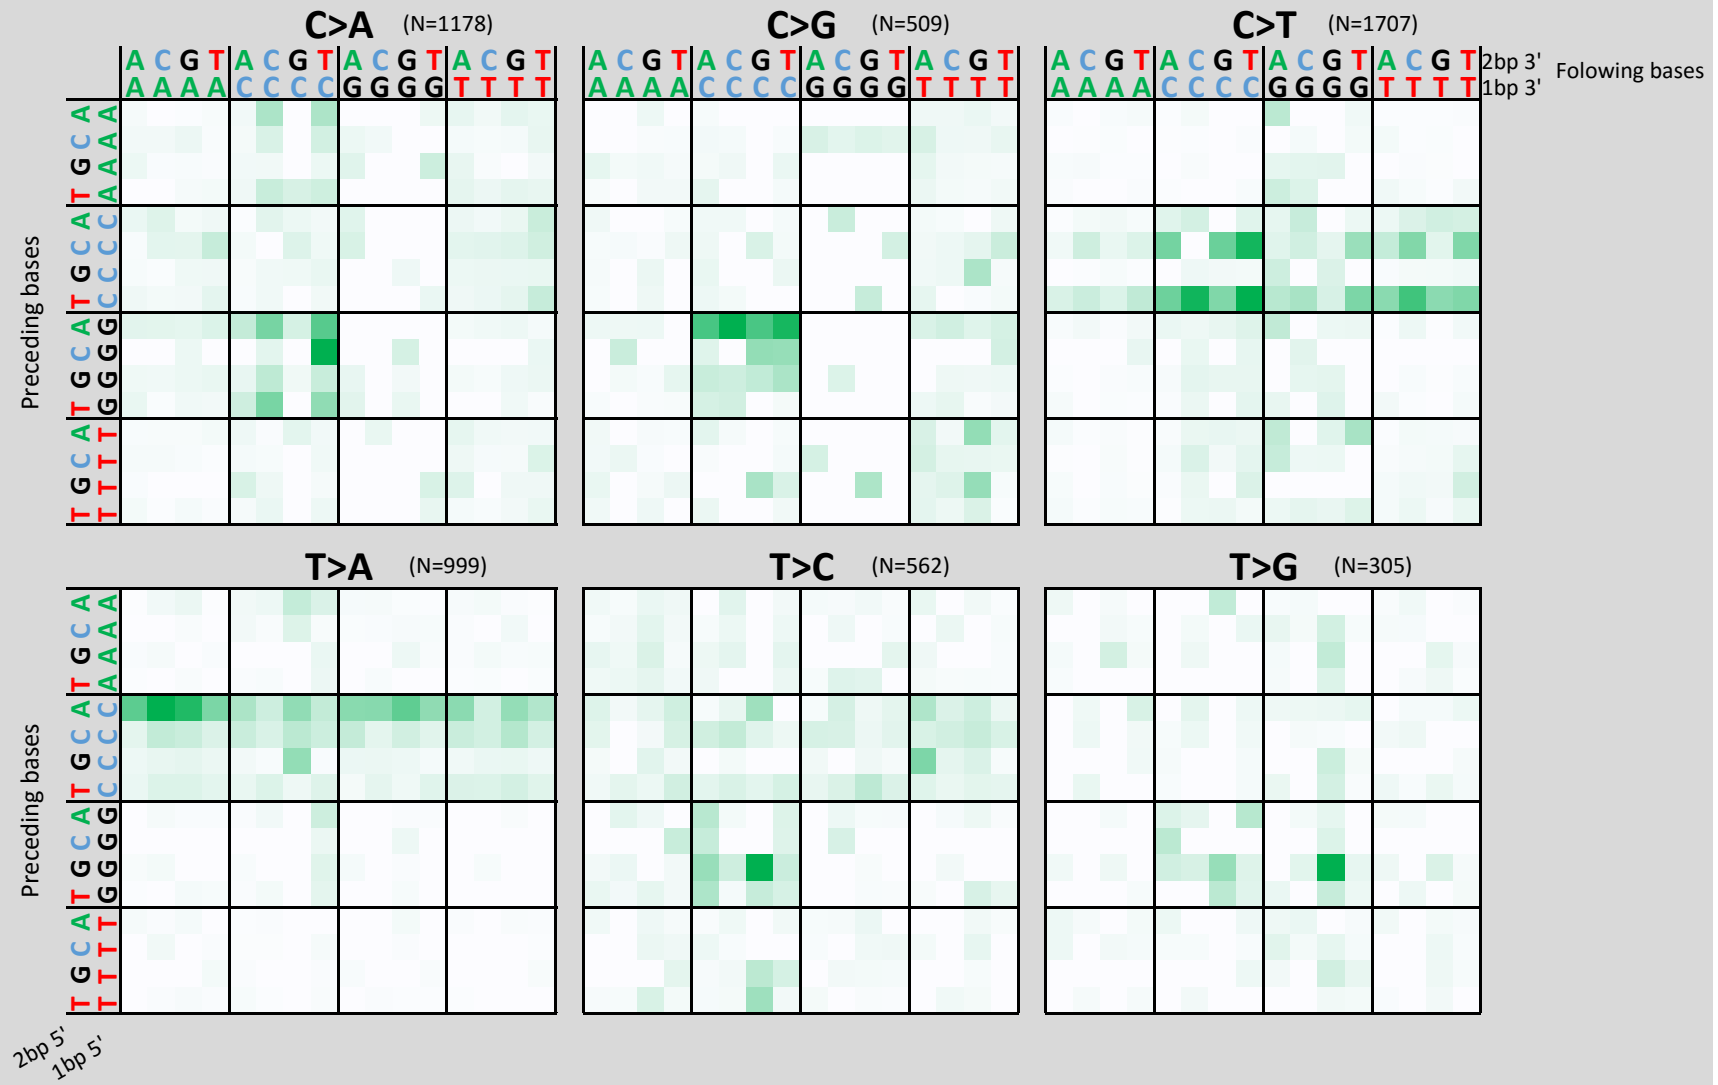

Supplemental Fig. S2G: Pentanucleotide context in HepG2\_Cis\_1

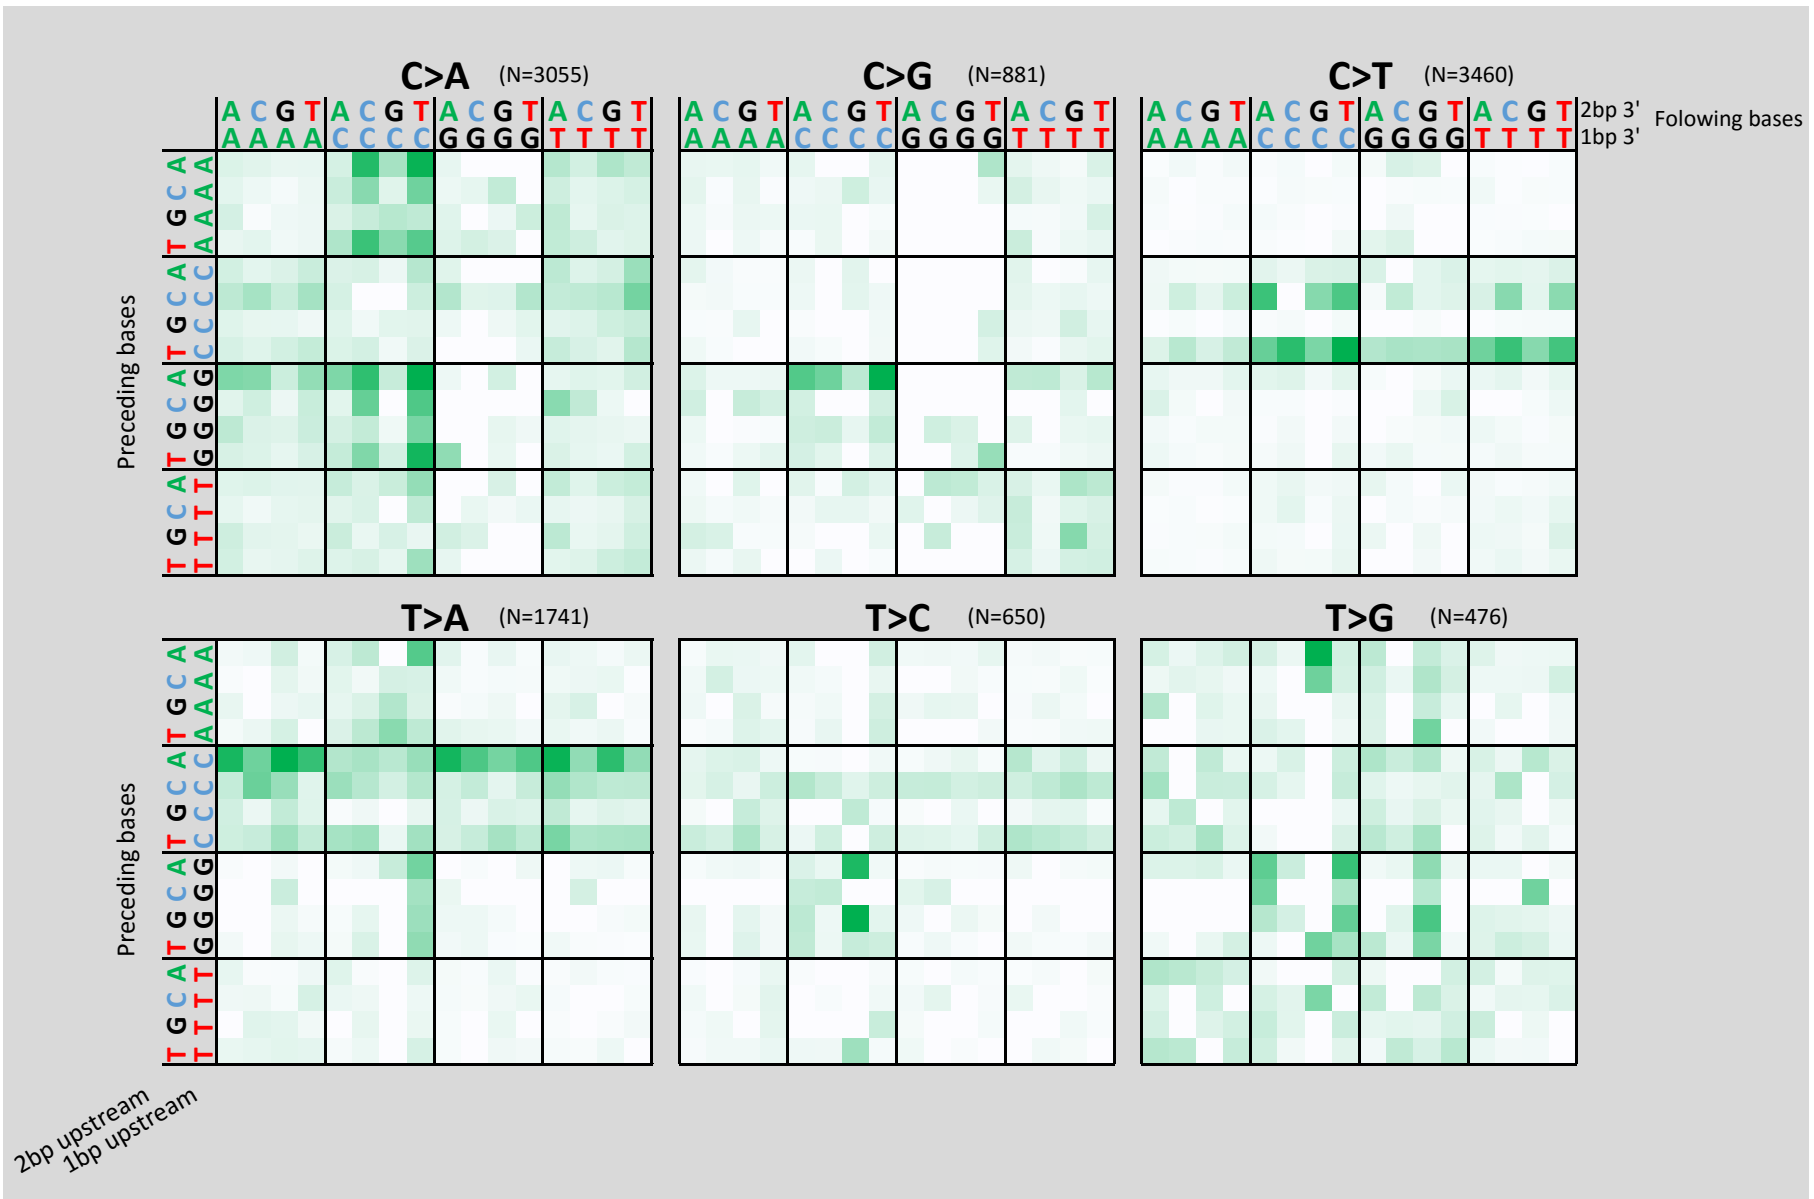

Supplemental Fig. S2H: Pentanucleotide context in HepG2\_Cis\_2

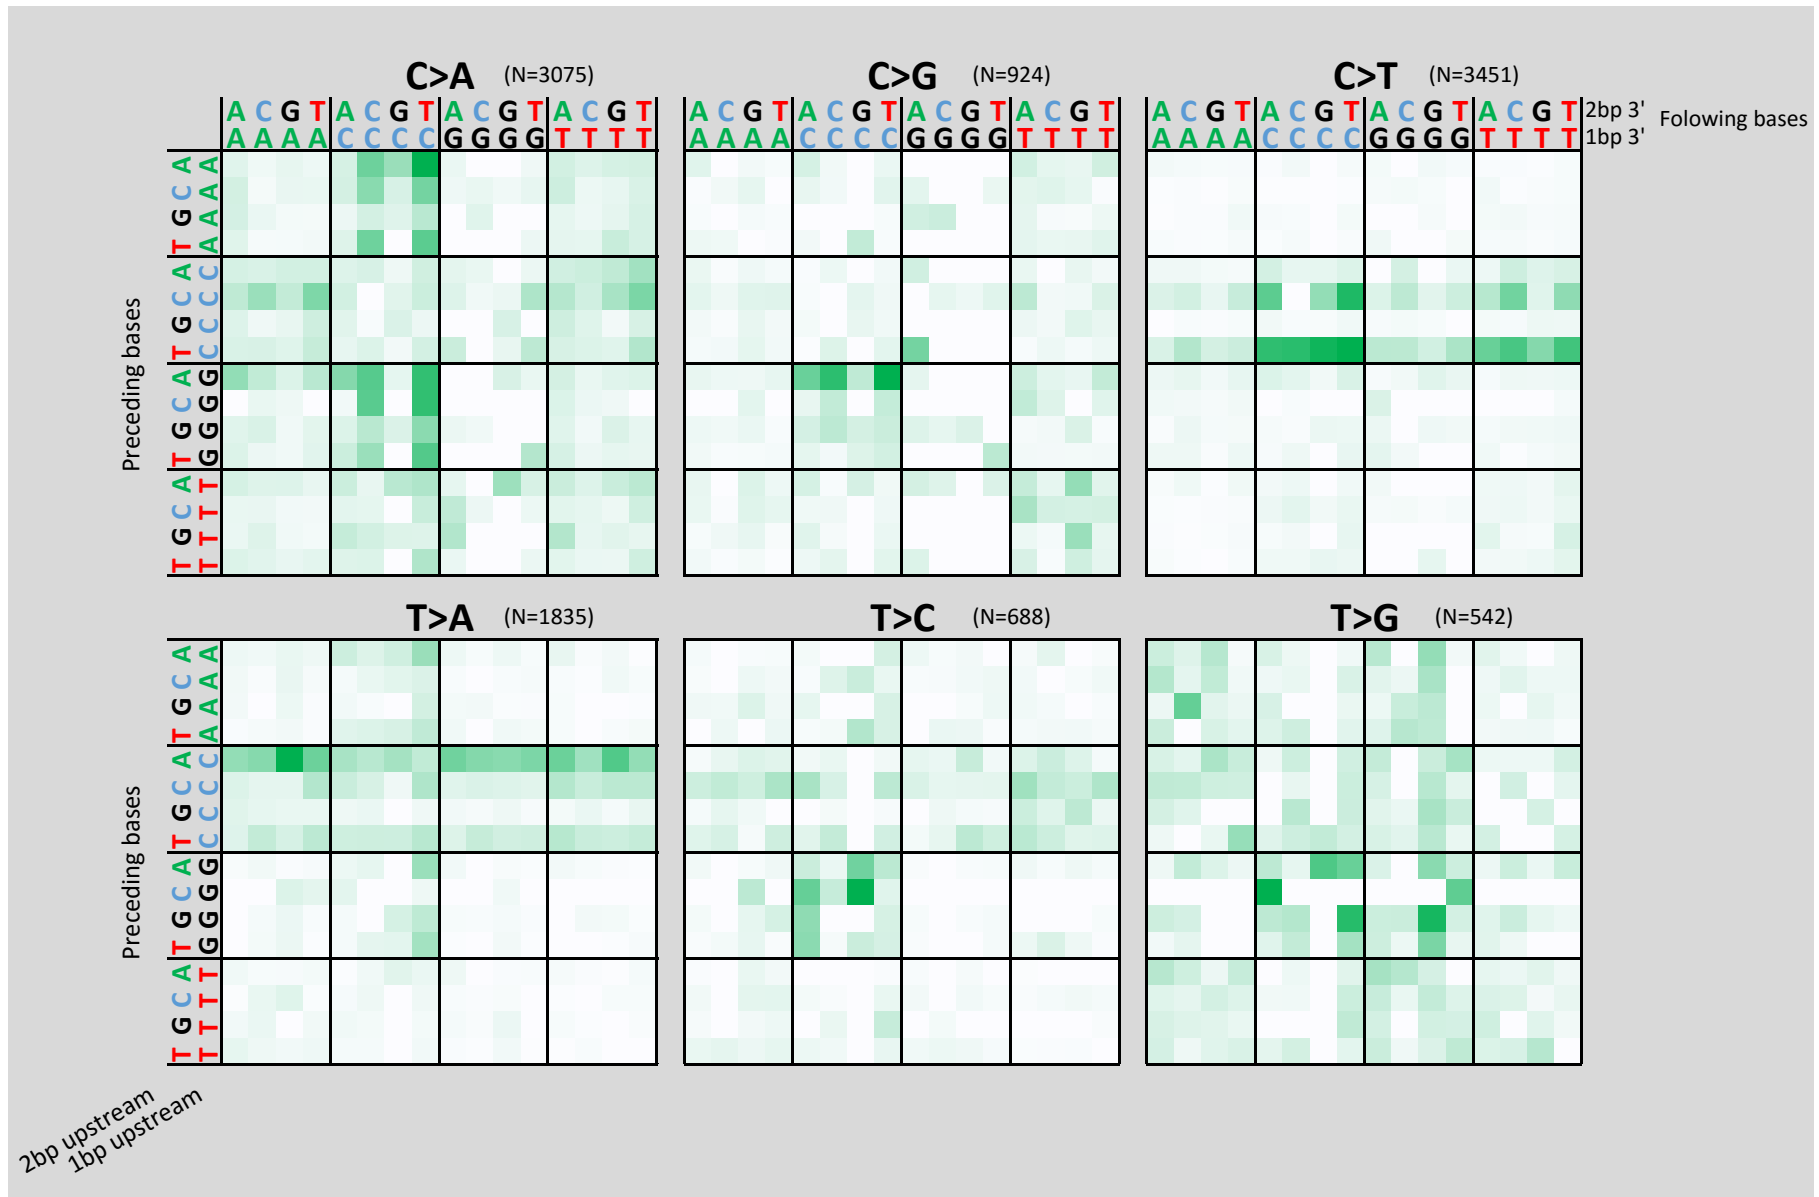

Supplemental Fig. S2I: Pentanucleotide context in HepG2\_Cis\_3

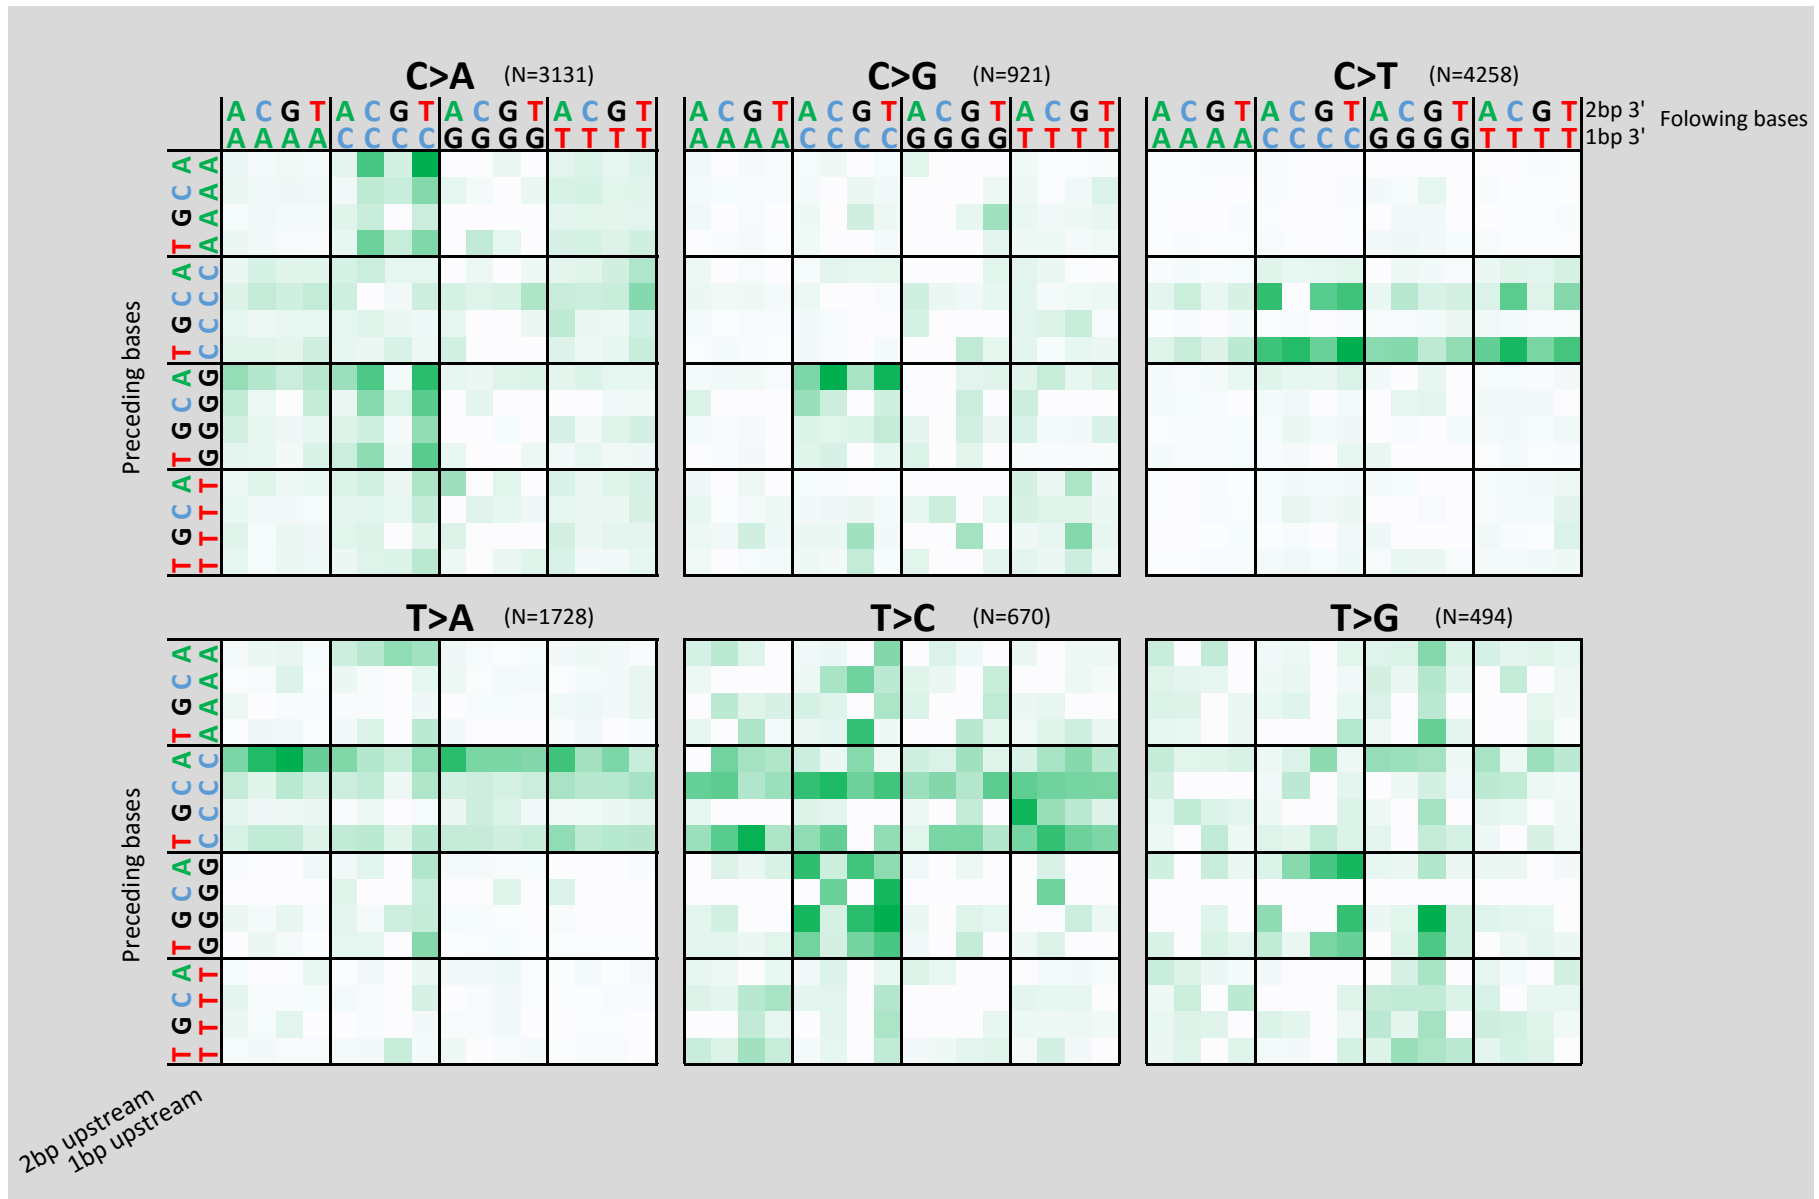



Supplemental Fig. S3: Graphical display of statistically significant enrichments and depletions of SNSs in pentanucleotide contexts in the combined MCF-10A (A) and HepG2 (B) data. Binomial tests were performed as described in Materials and Methods. Results were summarized as either enriched for mutations (blue) or depleted for mutations (red) or no difference from expected (white). Dark green and red indicate sequence contexts that were significant after Bonferroni multiple testing correction (i.e.  $p < 0.05/1536$ ). Light blue and pink indicate sequence contexts that were not significant after correction for multiple testing (i.e.  $0.05 > p > 0.05/1536$ ).

Supplemental Fig. S3A: Graphical display of pentanucleotides significantly enriched or depleted for SNSs in MCF-10A clones

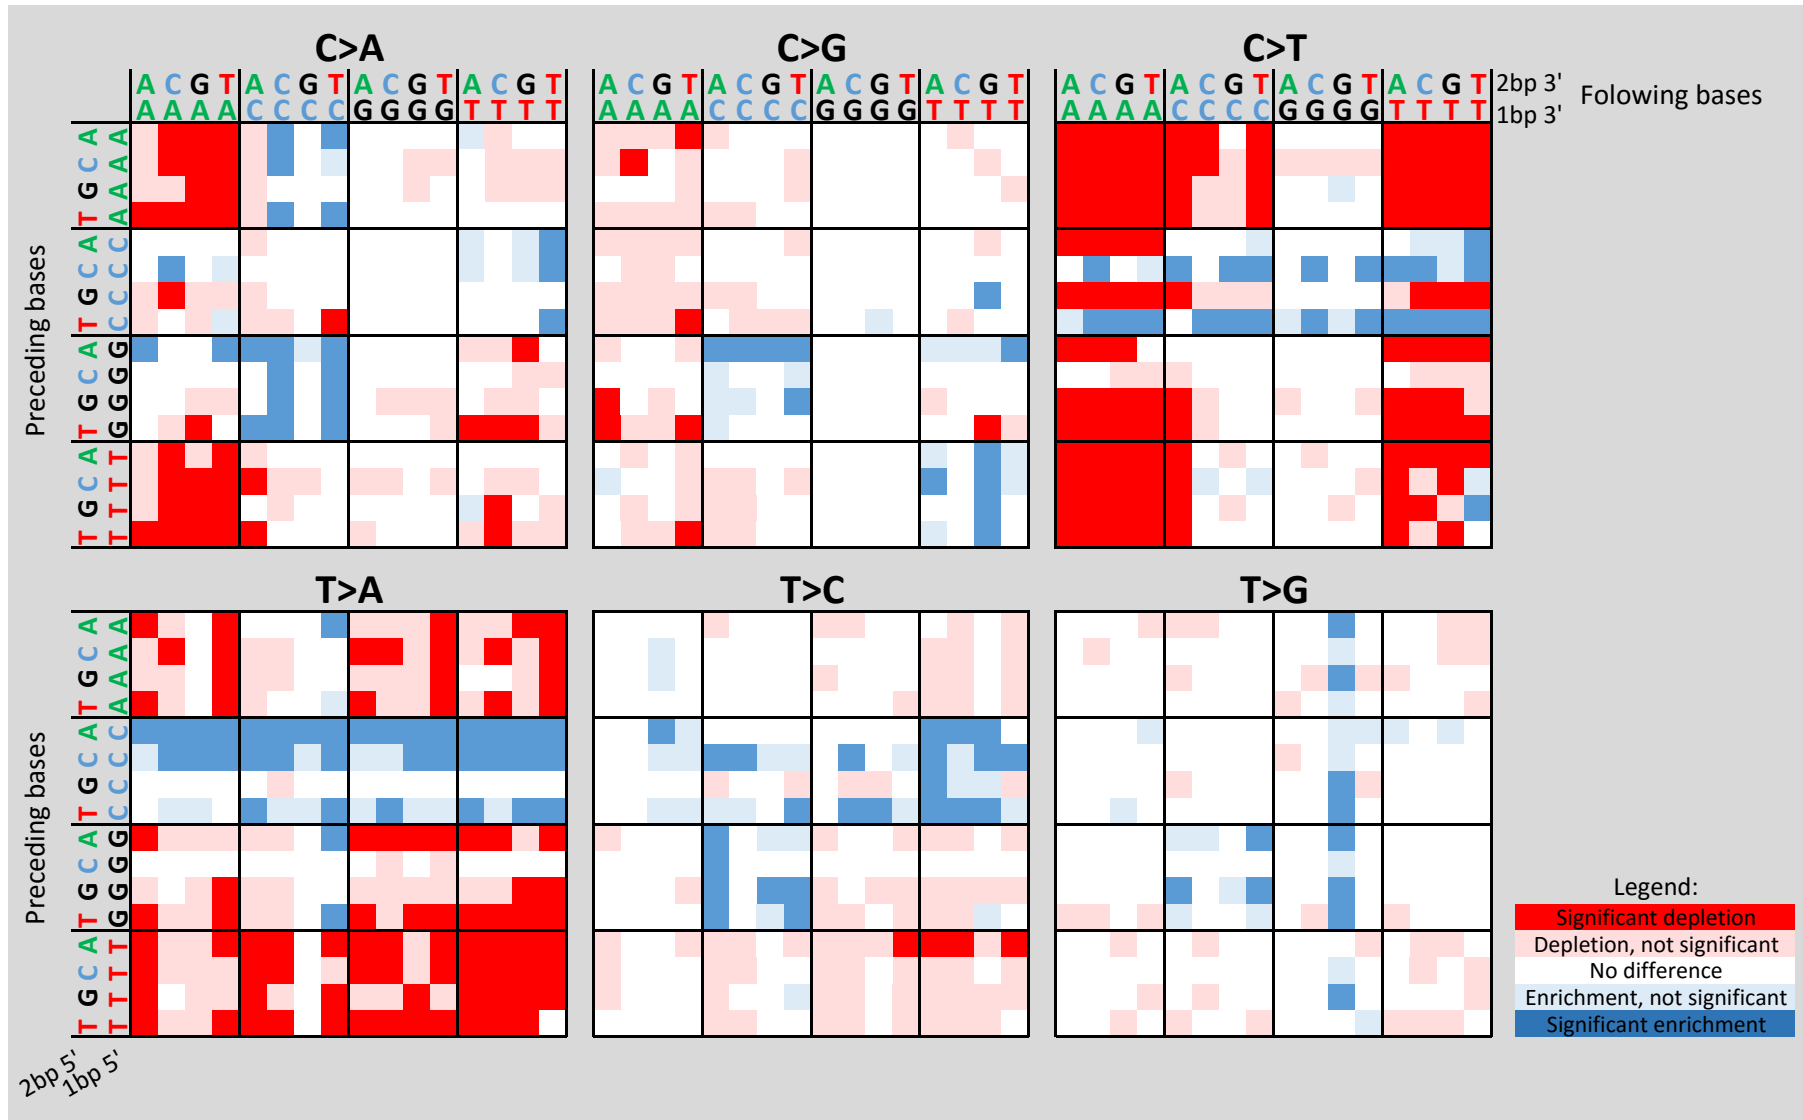

Supplemental Fig. S3B: Graphical display of pentanucleotides significantly enriched or depleted for SNSs in HepG2 clones

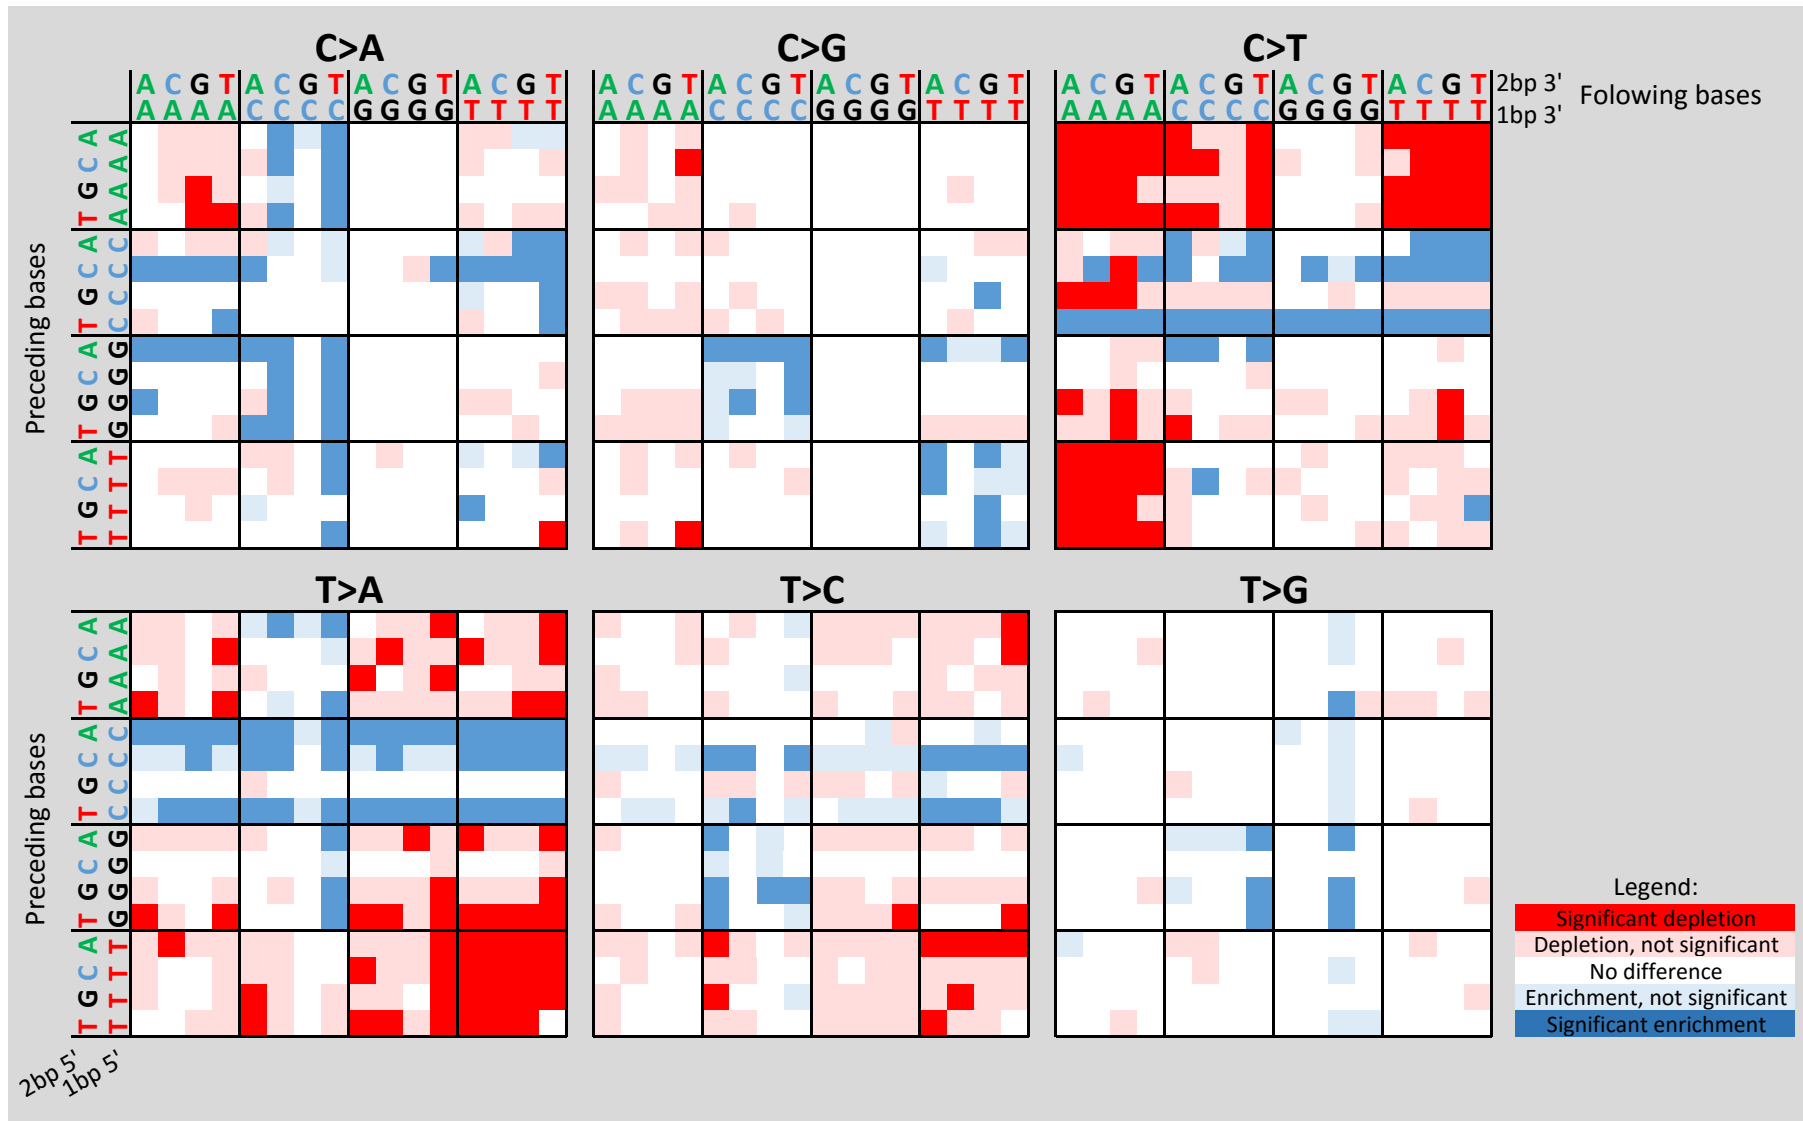

























T>C

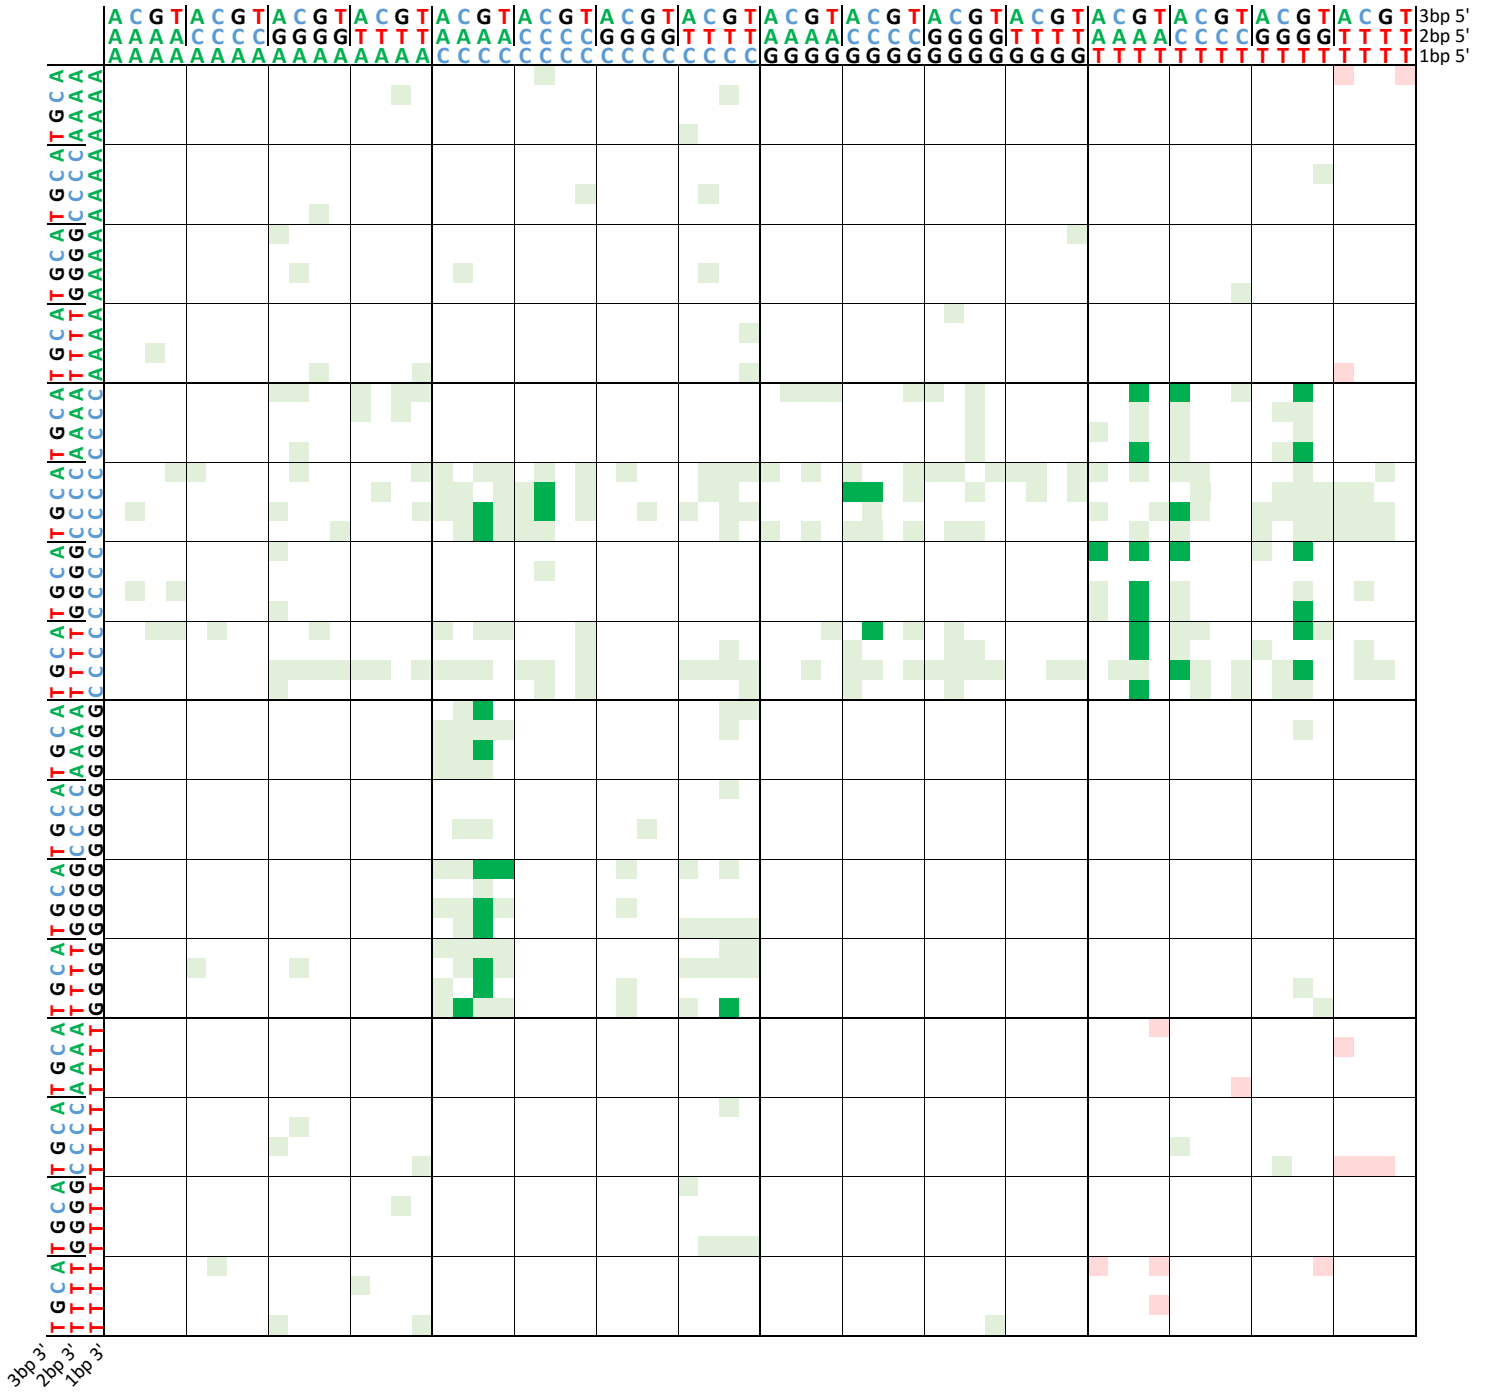







Supplemental Fig. S6: Transcription strand bias as a function of gene expression for each of the cisplatin treated MCF-10A and HepG2 clones. Genes were divided in either low or highly expressed (using the median). Transcription strand bias was plotted for each of the mutation classes. Dark = sense (untranscribed) strand, light = antisense (transcribed) strand.

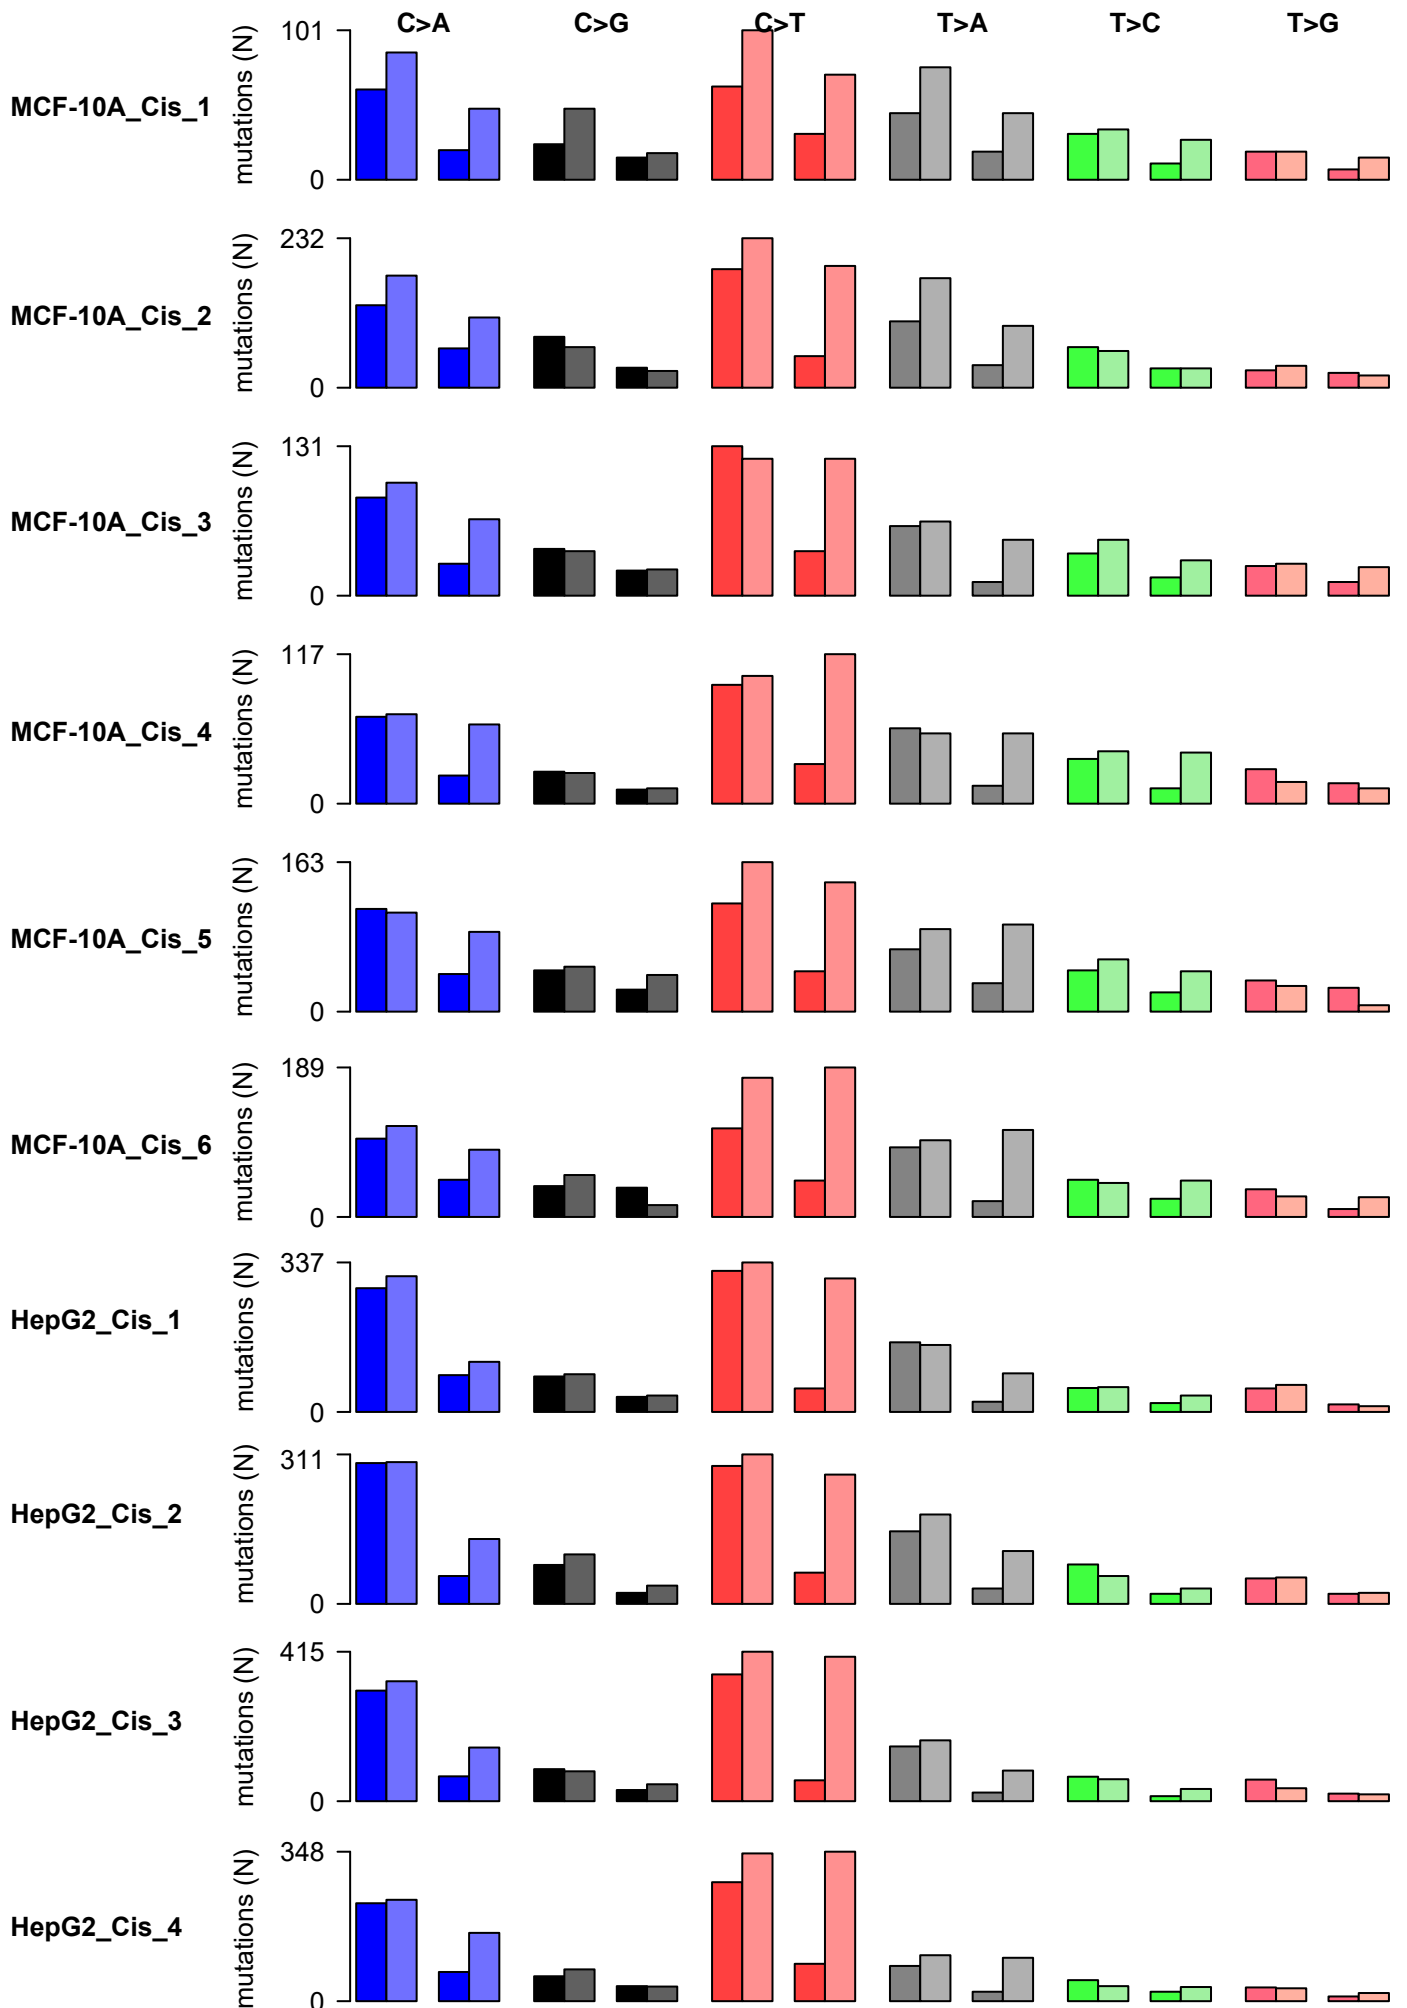

Supplemental Fig. S7: Transcription strand bias as a function of distance to the transcription start site in cisplatin treated MCF-10A and HepG2 clones. Mutations were binned according to their distance to the respective TSS of their respective genes. Bin 1 is 0 to 100,000 bp away from the TSS, bin 2 is 100,001 to 200,000 bp away from the TSS and so forth. Dark = sense (untranscribed) strand, light = antisense (transcribed) strand.

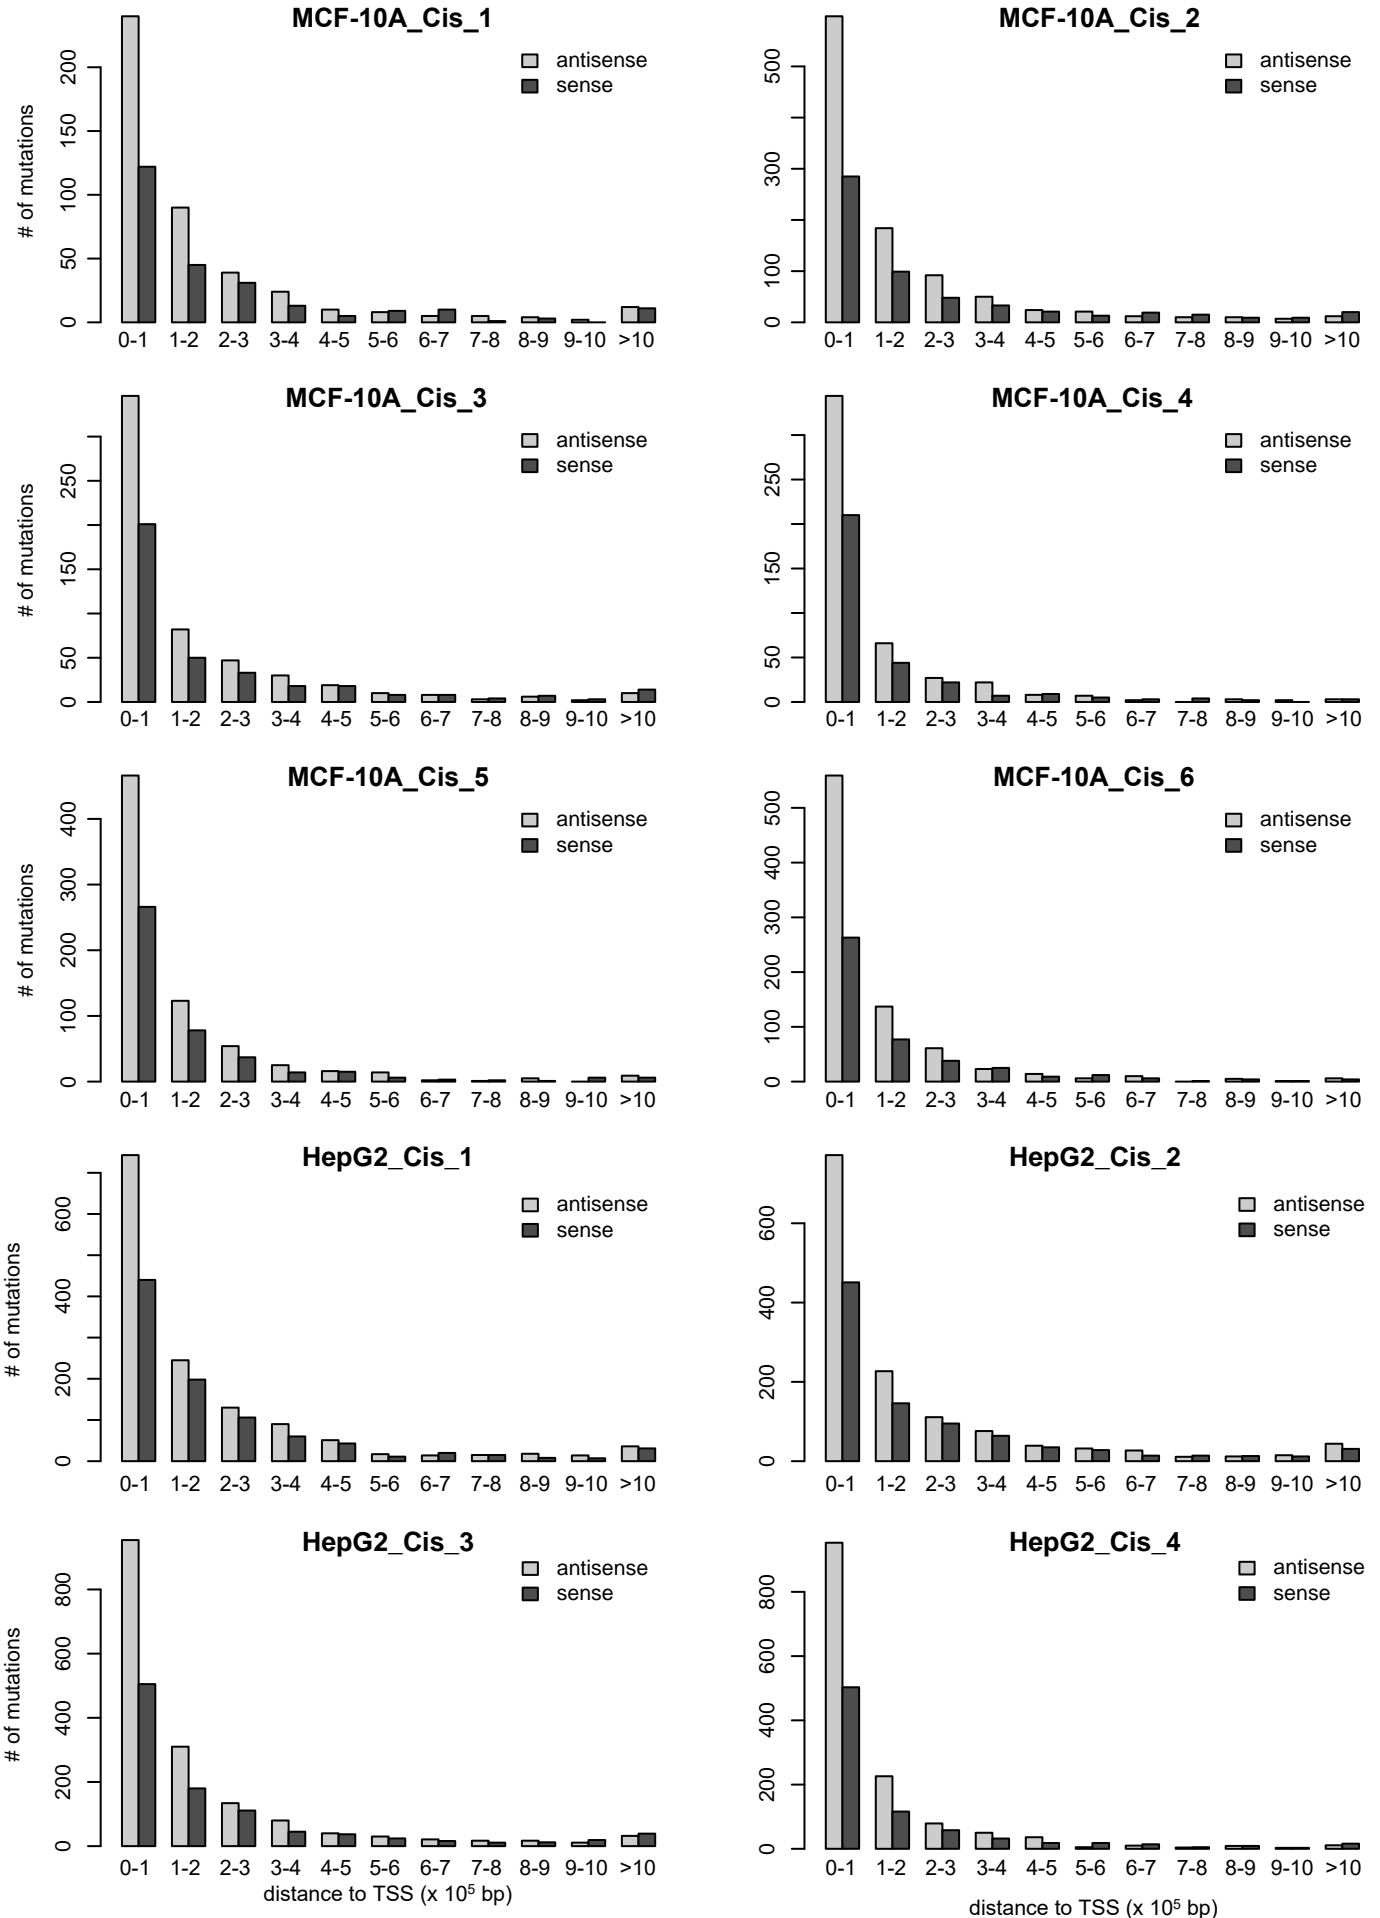



Supplemental Fig. S8: Replication timing bias of cisplatin mutations in all 10 cisplatin treated cell line clones

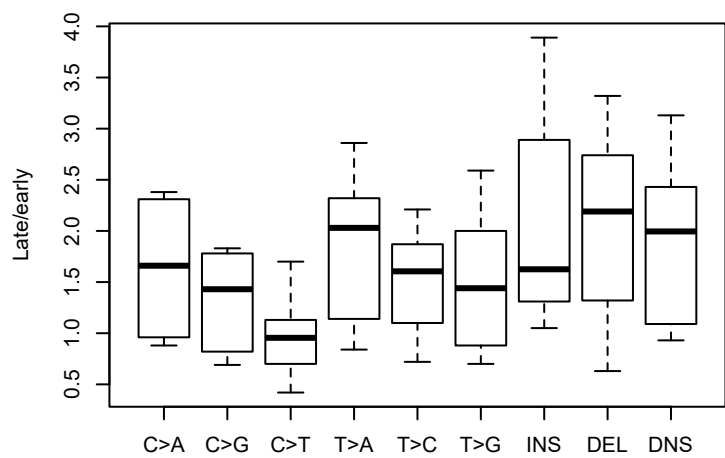

Supplemental Fig. S9: DNS mutational spectra of cisplatin treated MCF-10A and HepG2 clones per mutations per million dinucleotides in the genome.

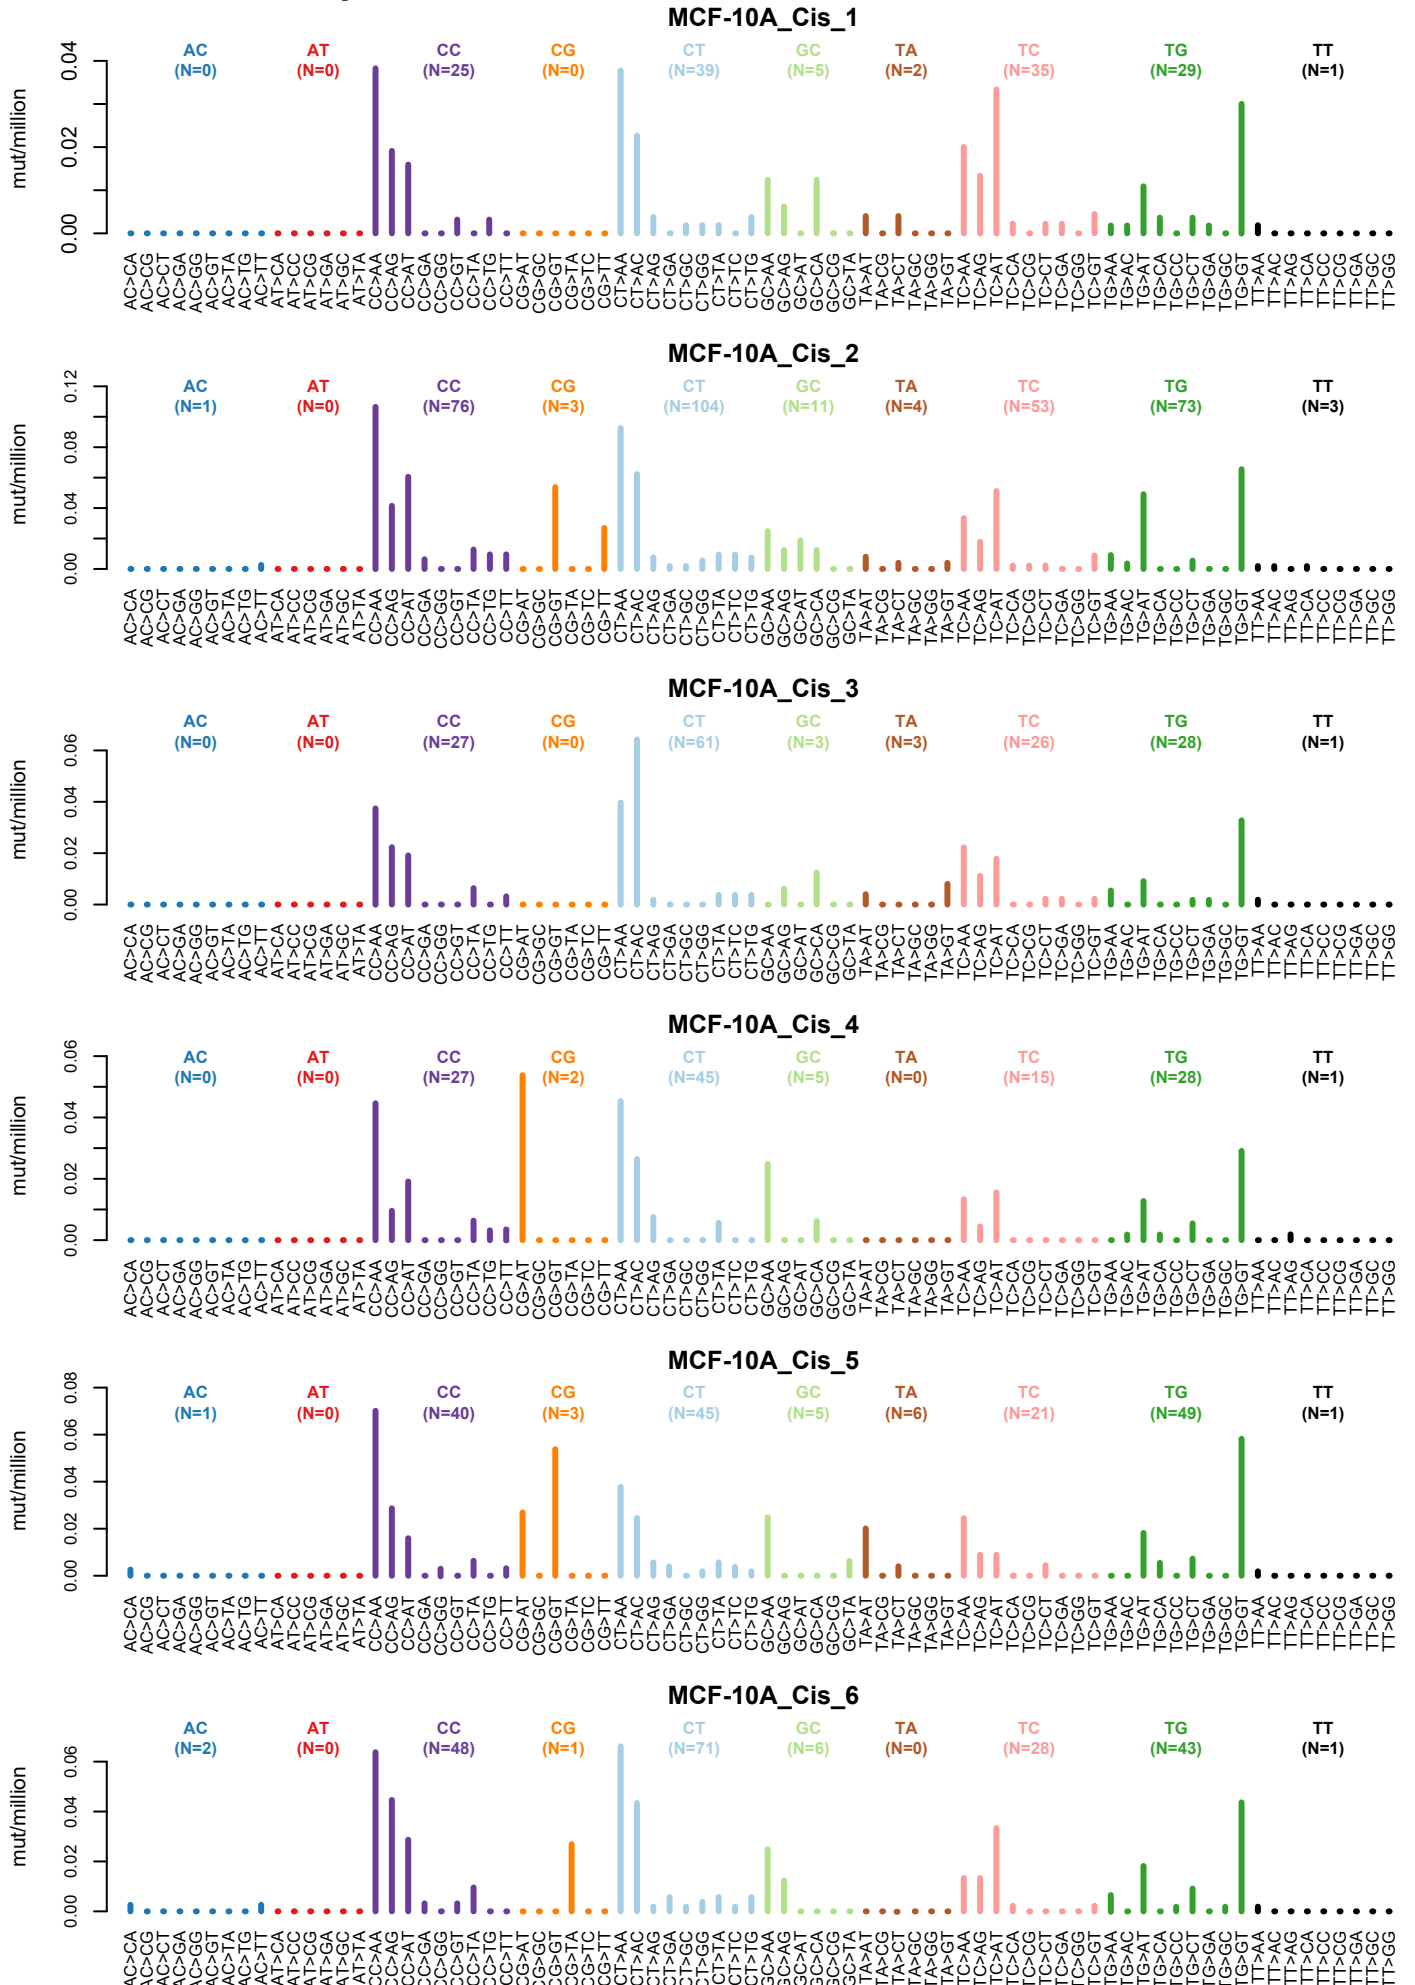

### HepG2\_Cis\_1

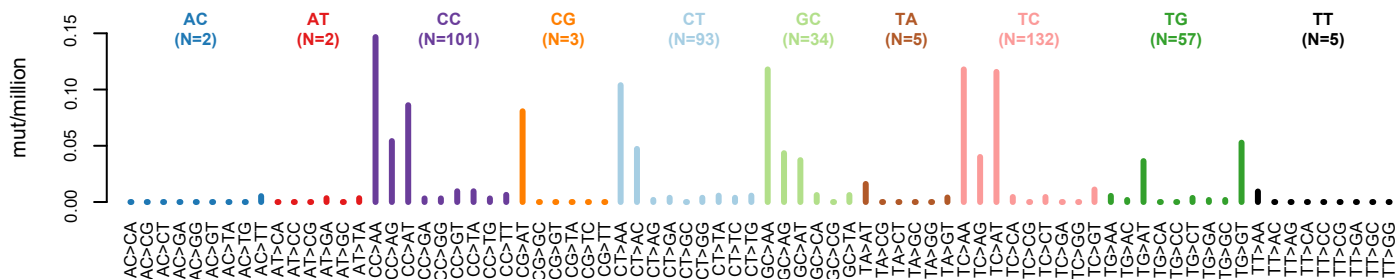

### HepG2\_Cis\_2

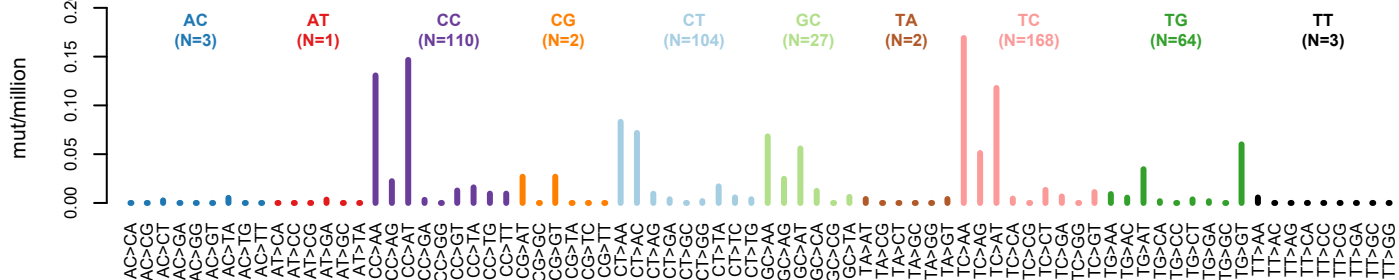

### HepG2\_Cis\_3

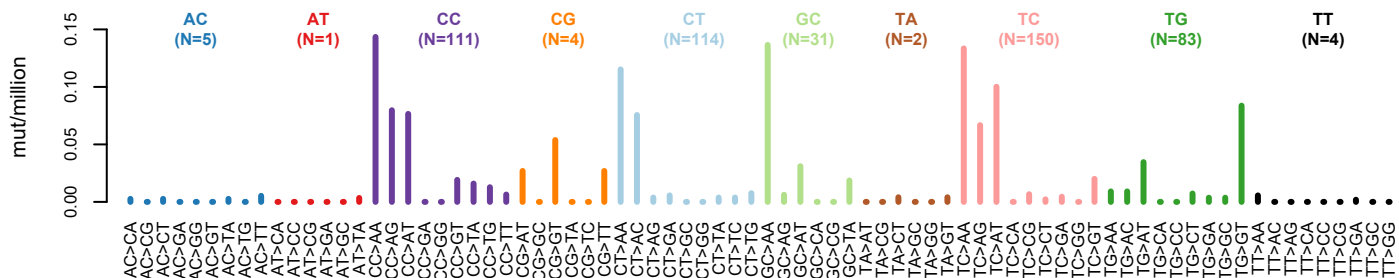

### HepG2\_Cis\_4

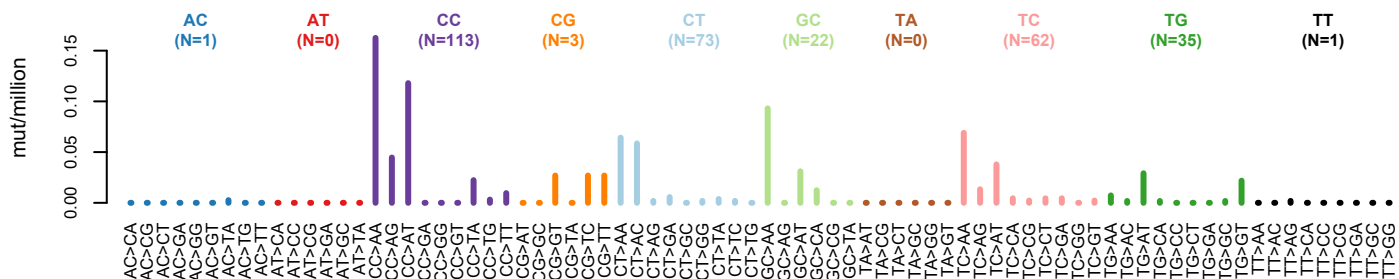

Supplemental Fig. S10:  $\pm 1$ bp sequence context preference of DNSs in the cisplatin treated MCF-10A and HepG2 clones. Sequence context preference is displayed both as raw counts, and normalized for tetranucleotide abundance in the genome. The total number of DNSs per mutation class is shown between brackets above each plot. Color intensity is relative to the number of mutations with that sequence context, normalized for tetranucleotide abundance in the genome. The vertical axis is the preceding base; the horizontal axis is the following base.

## MCF-10A\_Cis\_1

Raw counts (genome)

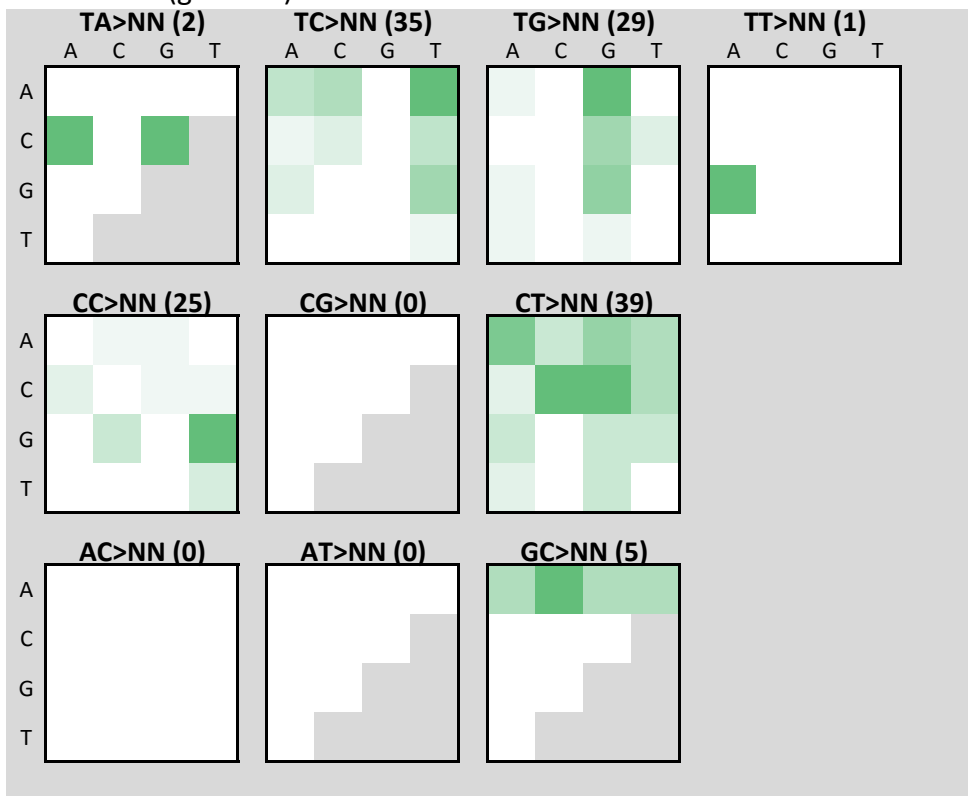

Flat (as if genome opportunity was equal for all tetranucleotides)

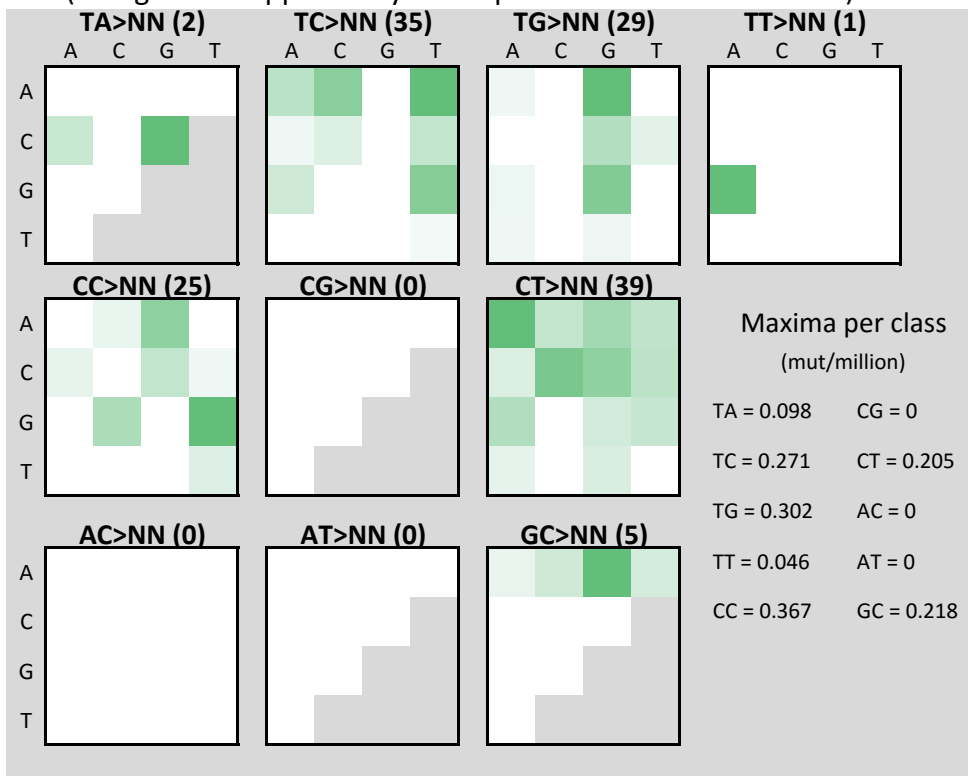

# MCF-10A\_Cis\_2

Raw counts (genome)

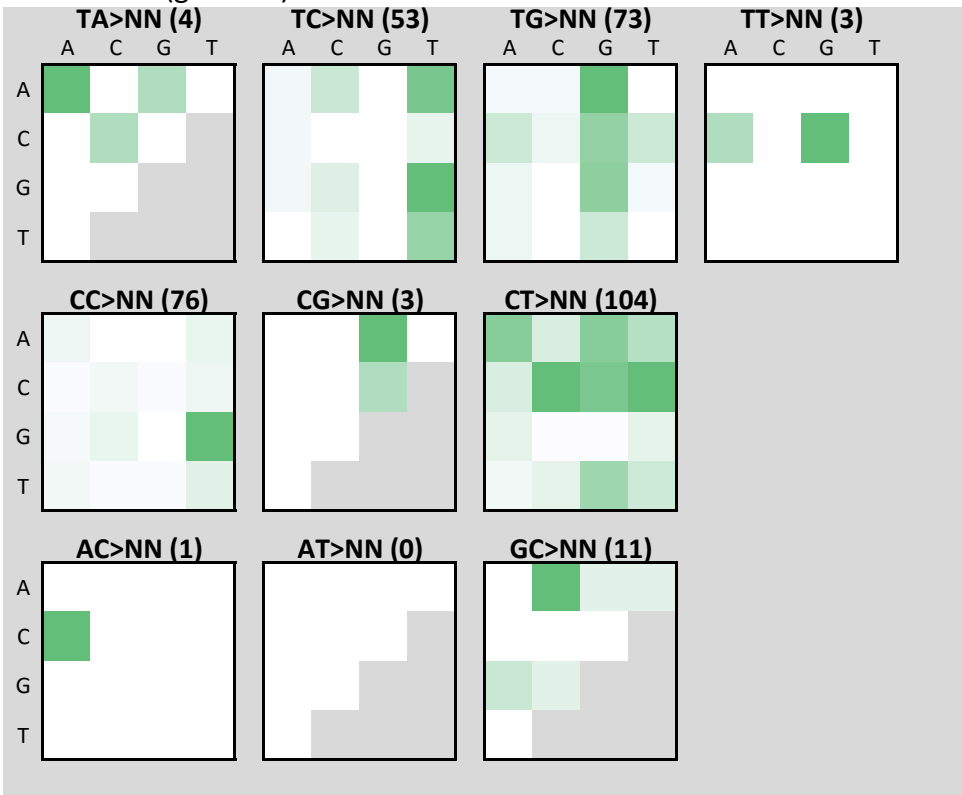

Flat (as if genome opportunity was equal for all tetranucleotides)

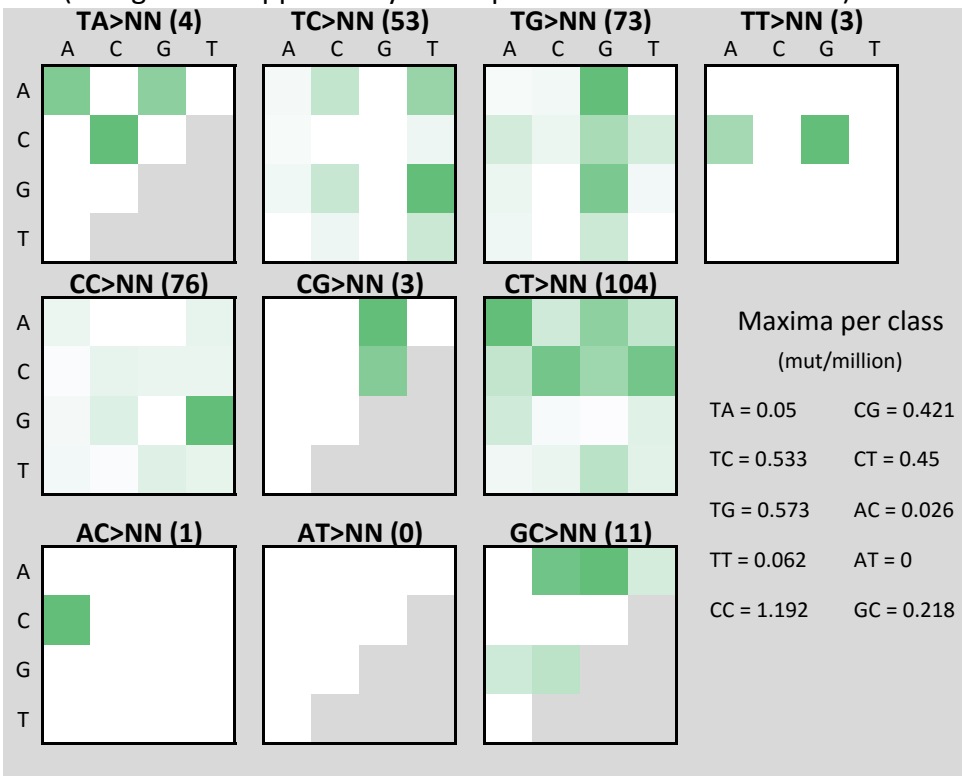

# MCF-10A\_Cis\_3

Raw counts (genome)

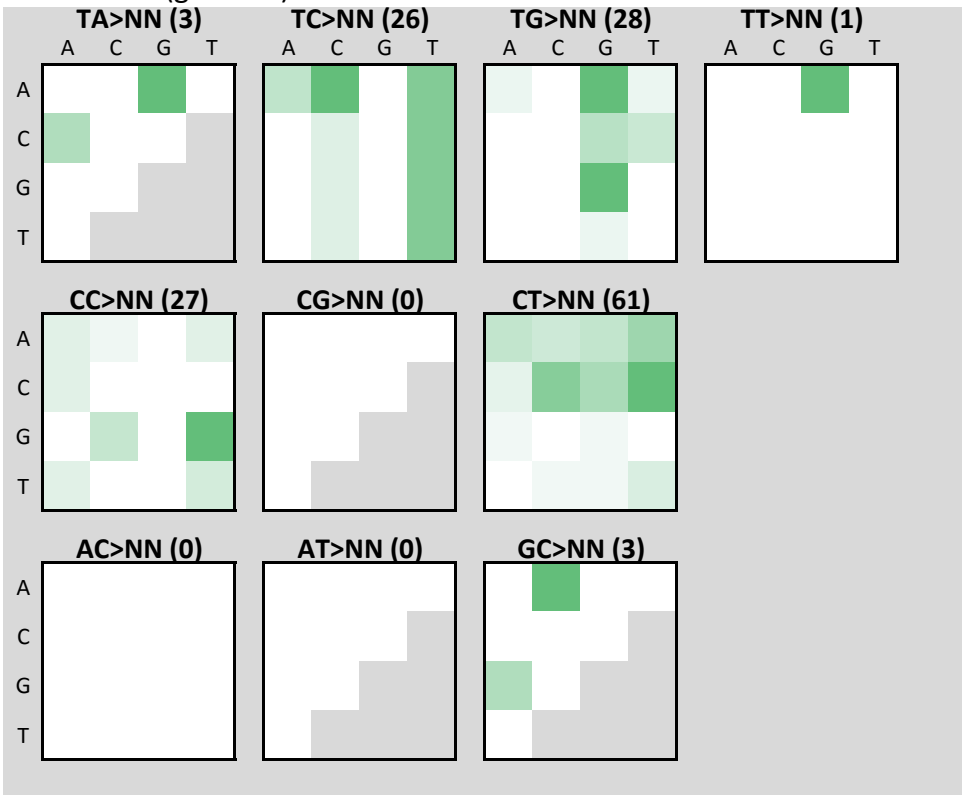

Flat (as if genome opportunity was equal for all tetranucleotides)

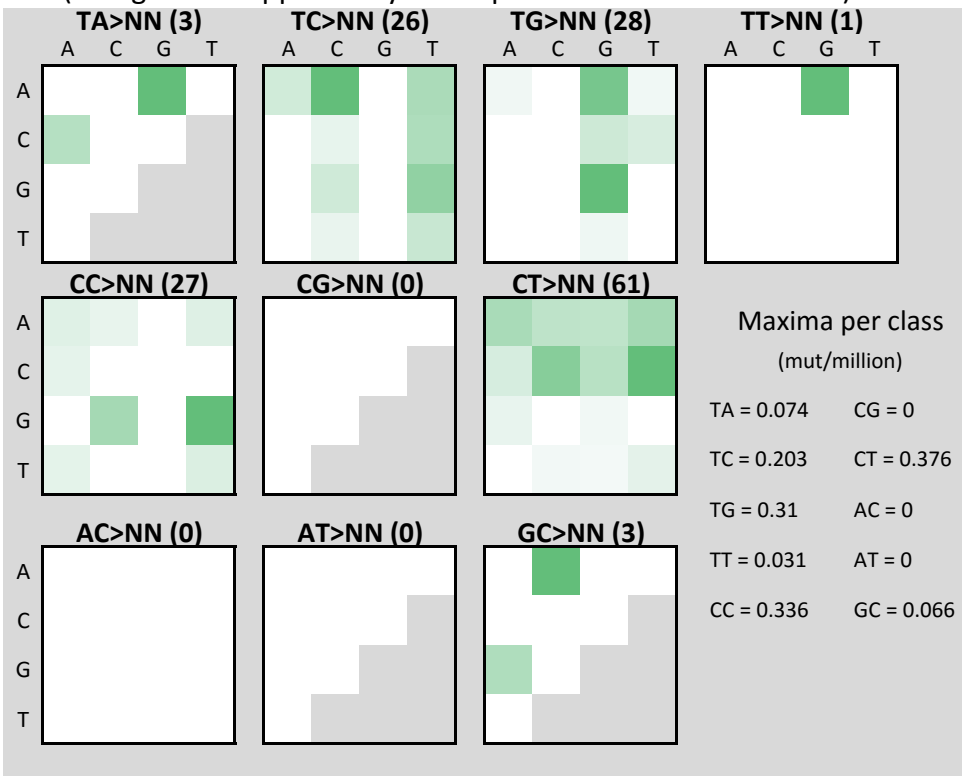

# MCF-10A\_Cis\_4

Raw counts (genome)

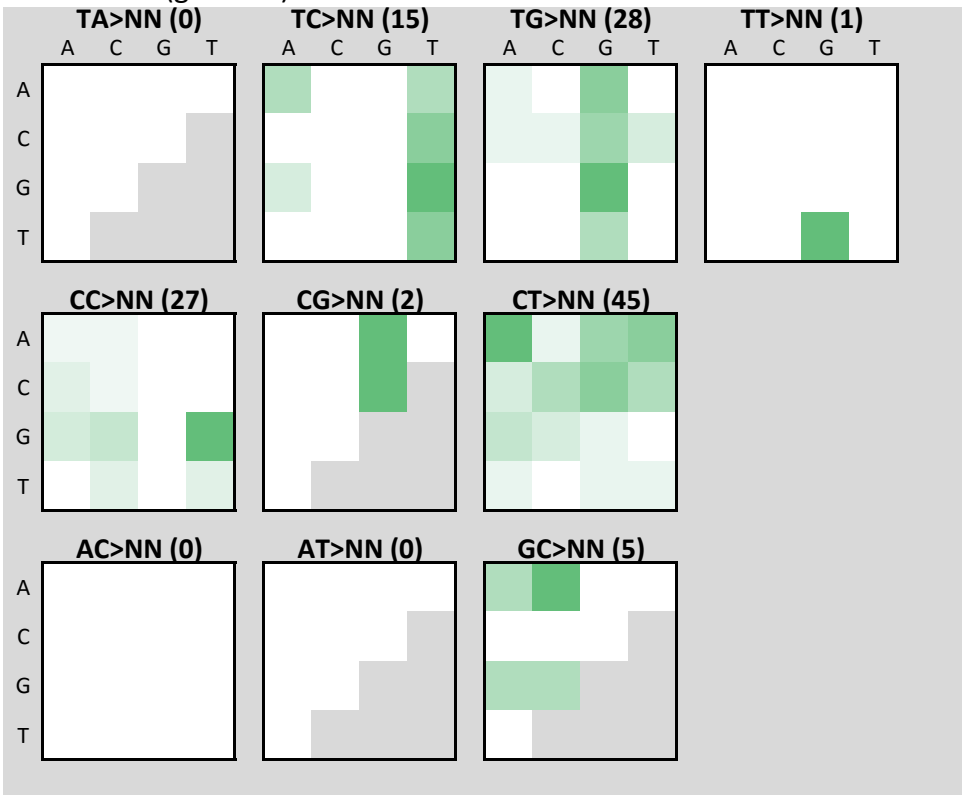

Flat (as if genome opportunity was equal for all tetranucleotides)

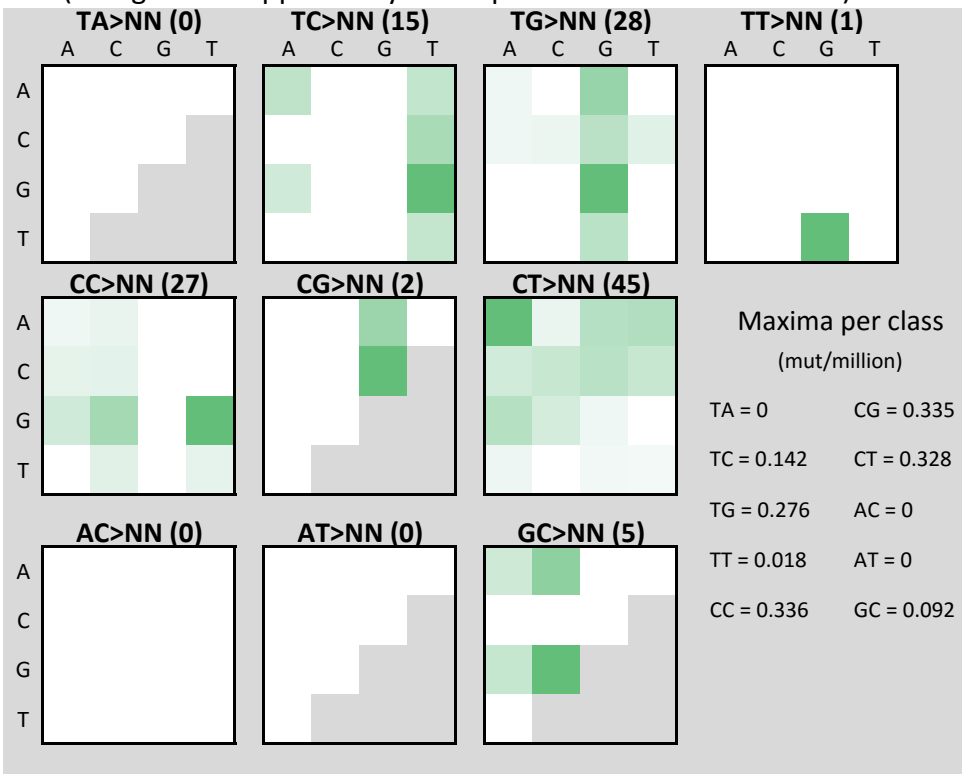

# MCF-10A\_Cis\_5

Raw counts (genome)

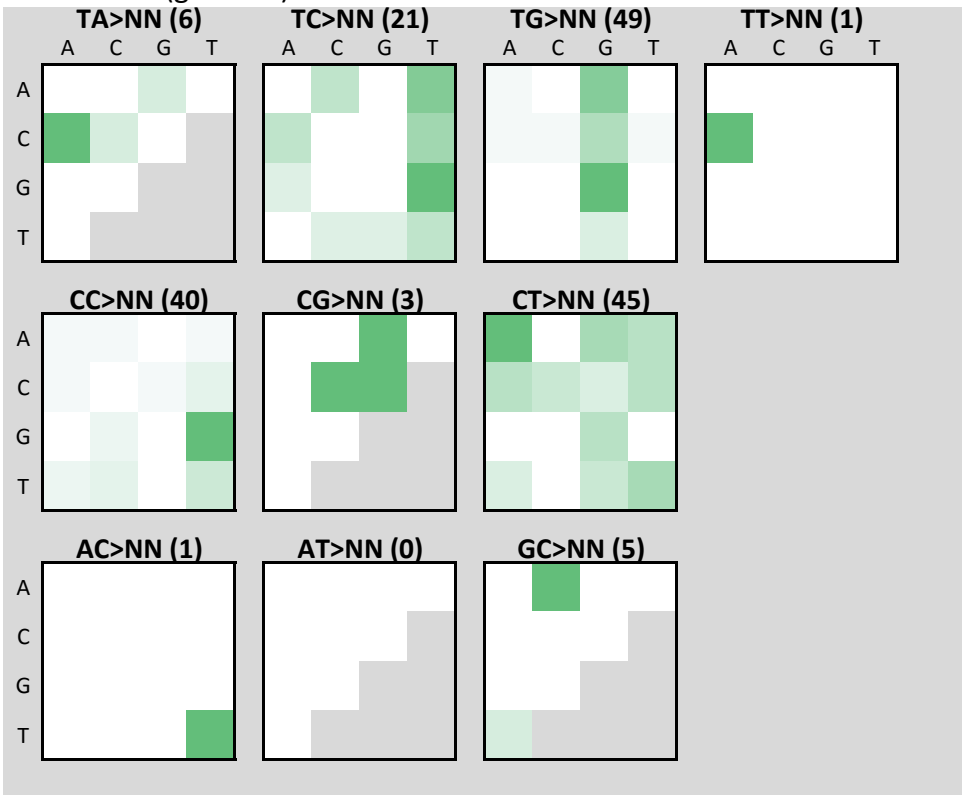

Flat (as if genome opportunity was equal for all tetranucleotides)

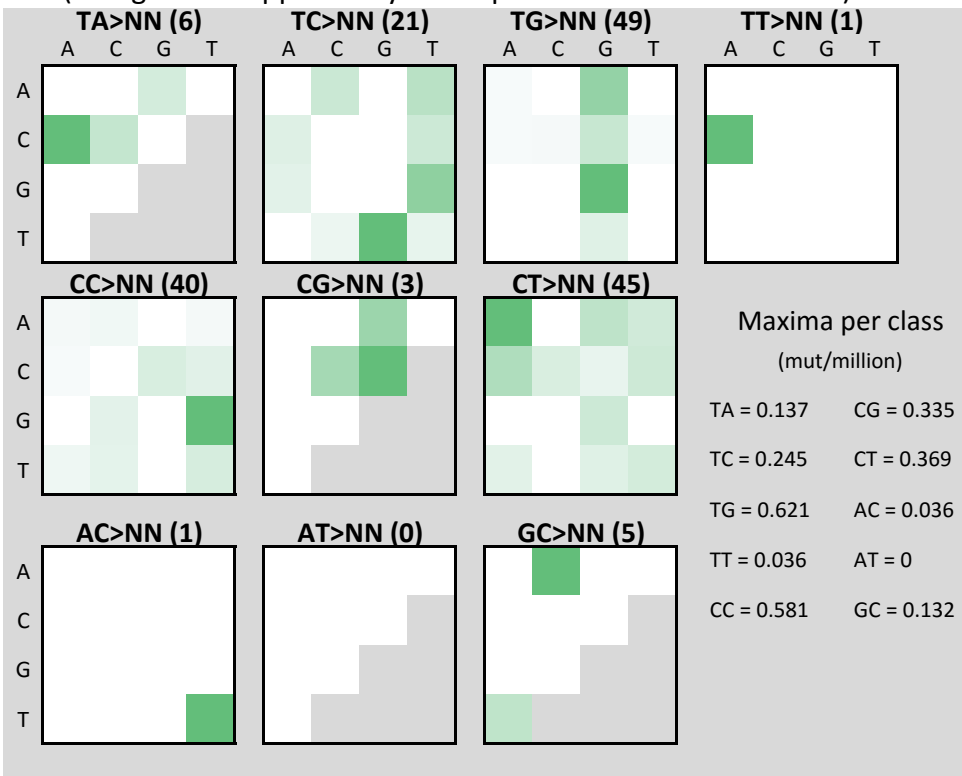



# MCF-10A\_Cis\_6

Raw counts (genome)

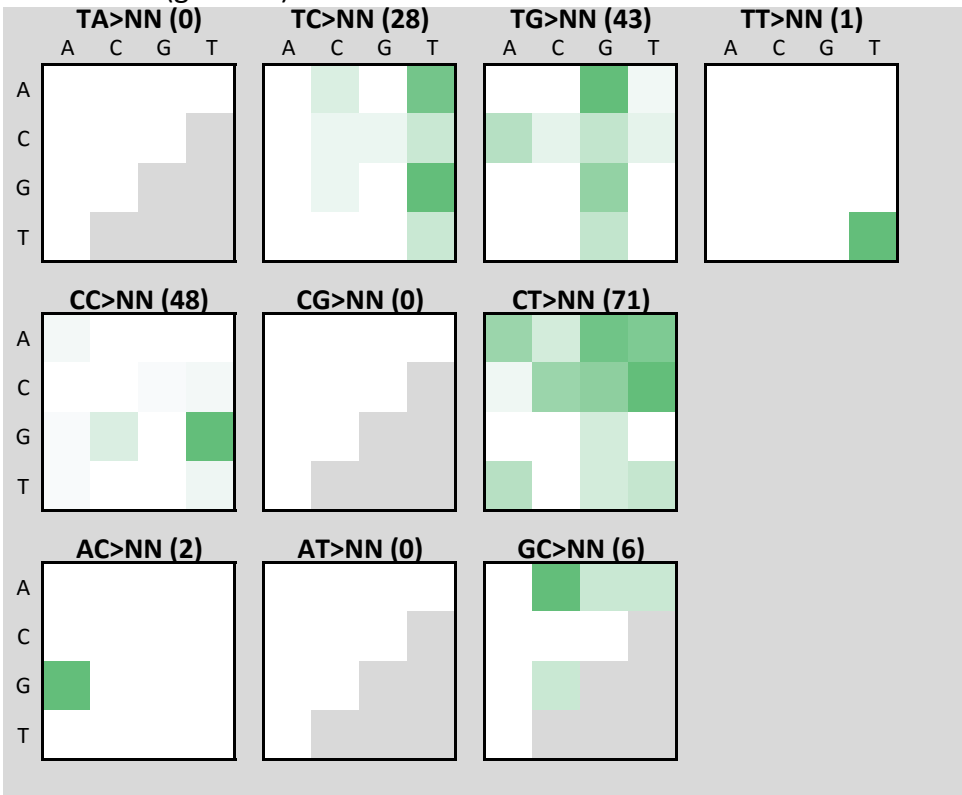

Flat (as if genome opportunity was equal for all tetranucleotides)

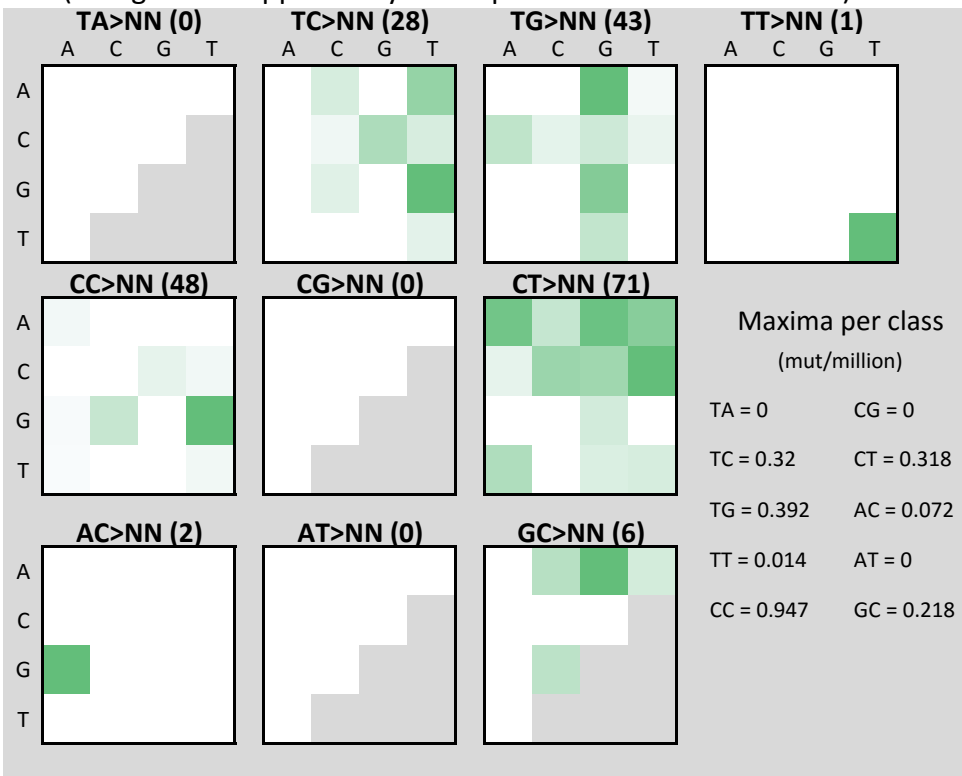

# HepG2\_Cis\_1

Raw counts (genome)

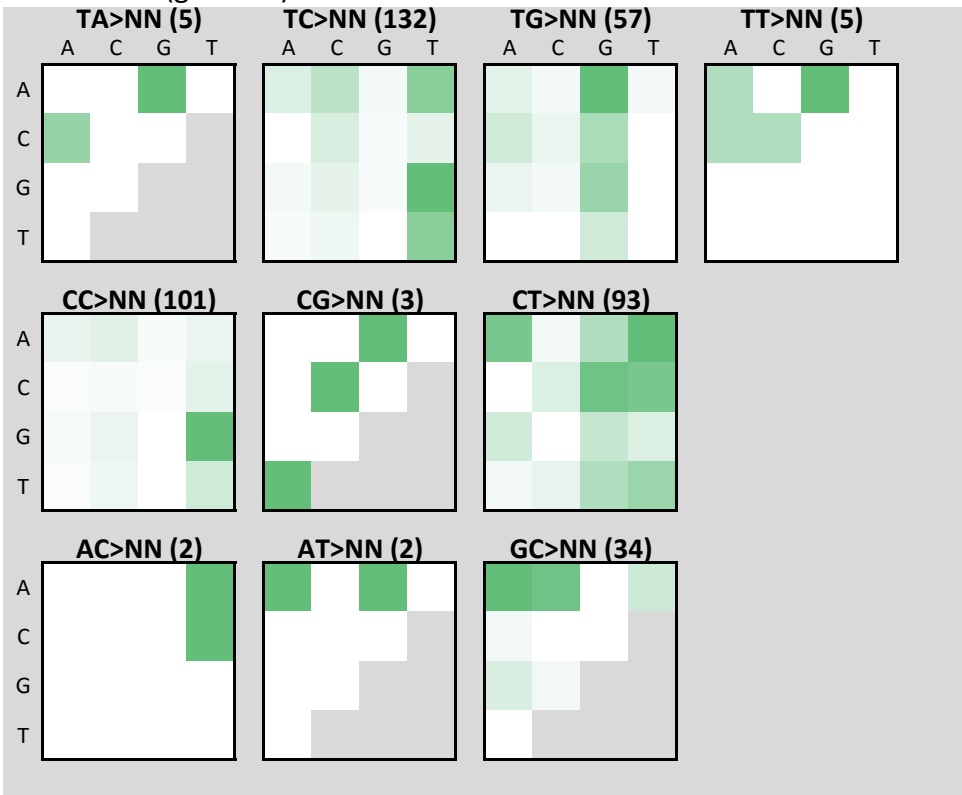

Flat (as if genome opportunity was equal for all tetranucleotides)

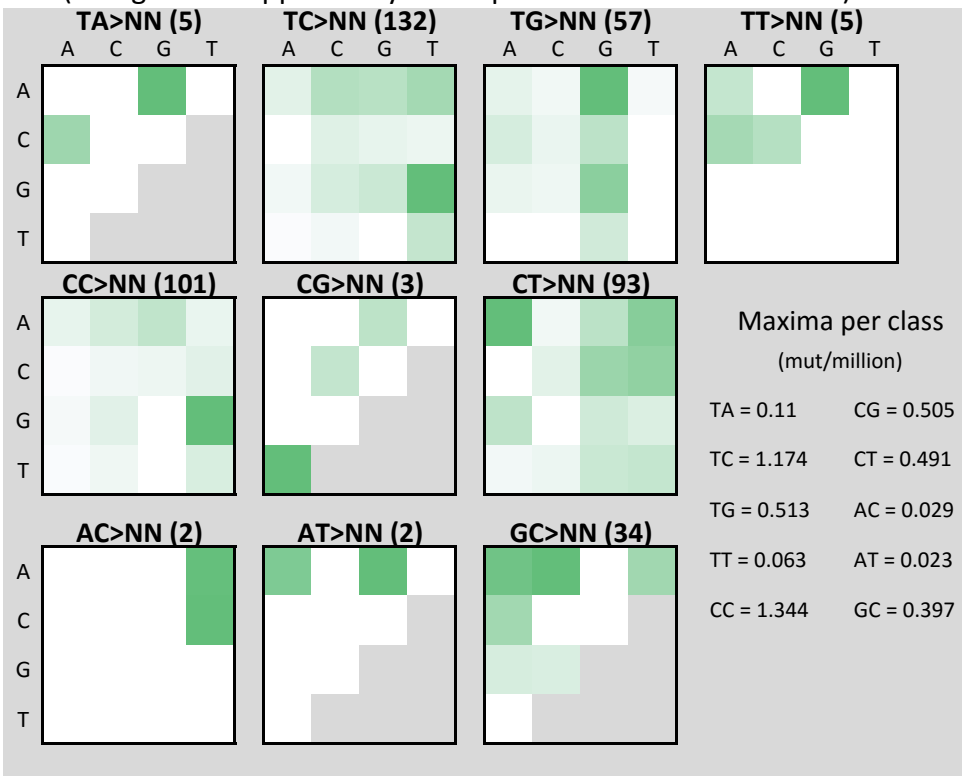

# HepG2\_Cis\_2

Raw counts (genome)

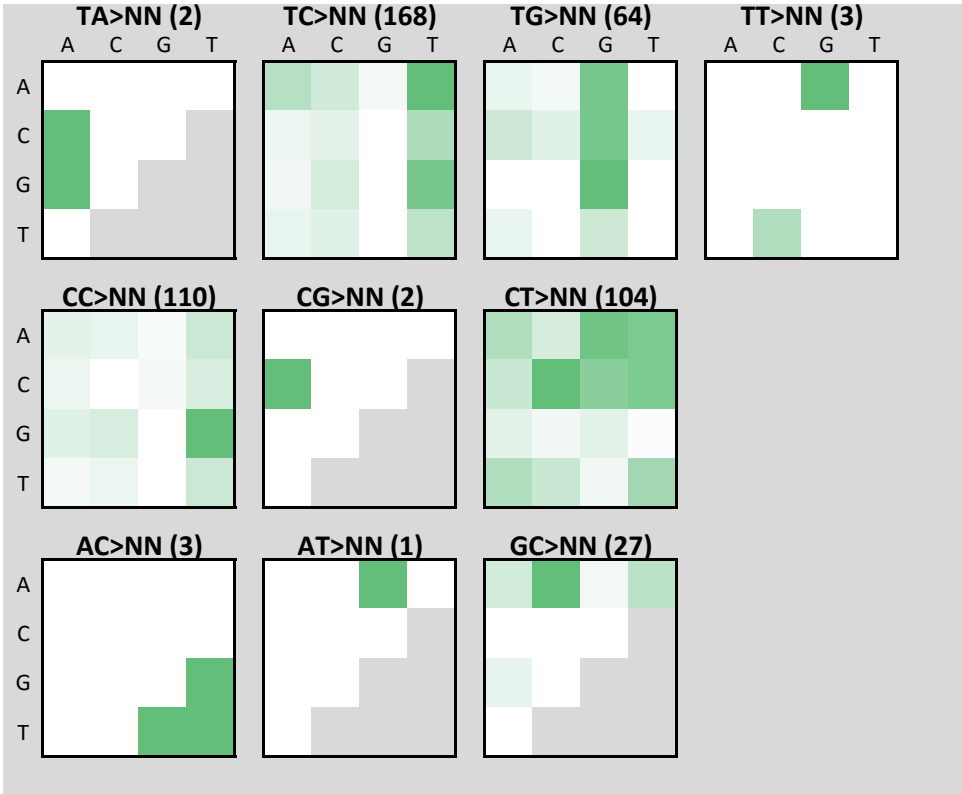

Flat (as if genome opportunity was equal for all tetranucleotides)

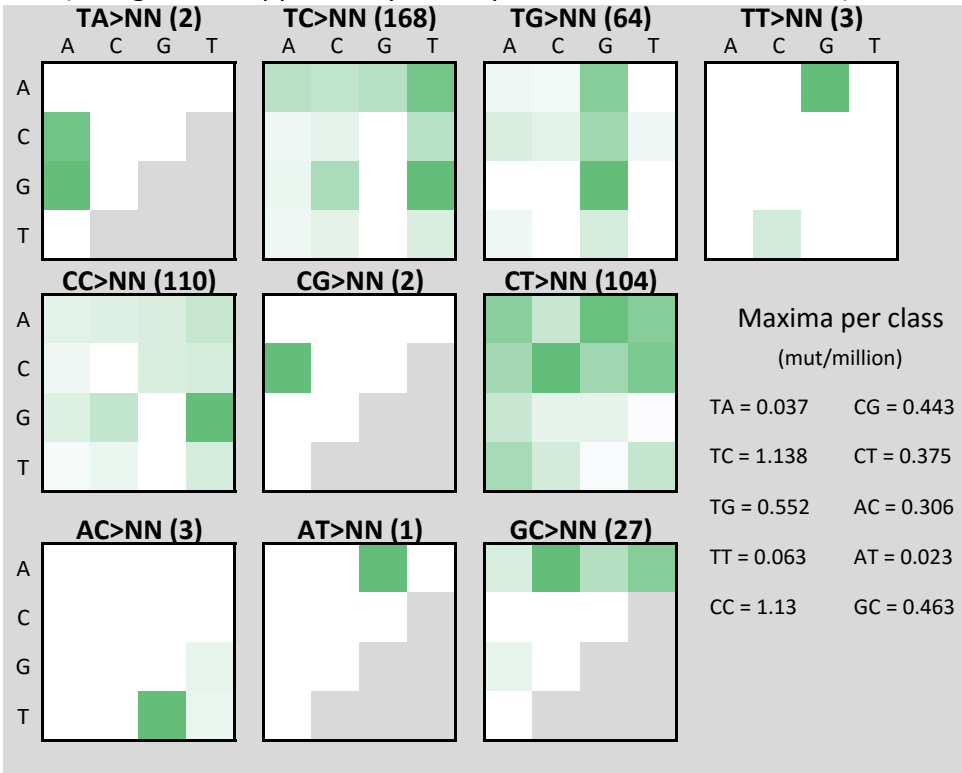

# HepG2\_Cis\_3

Raw counts (genome)

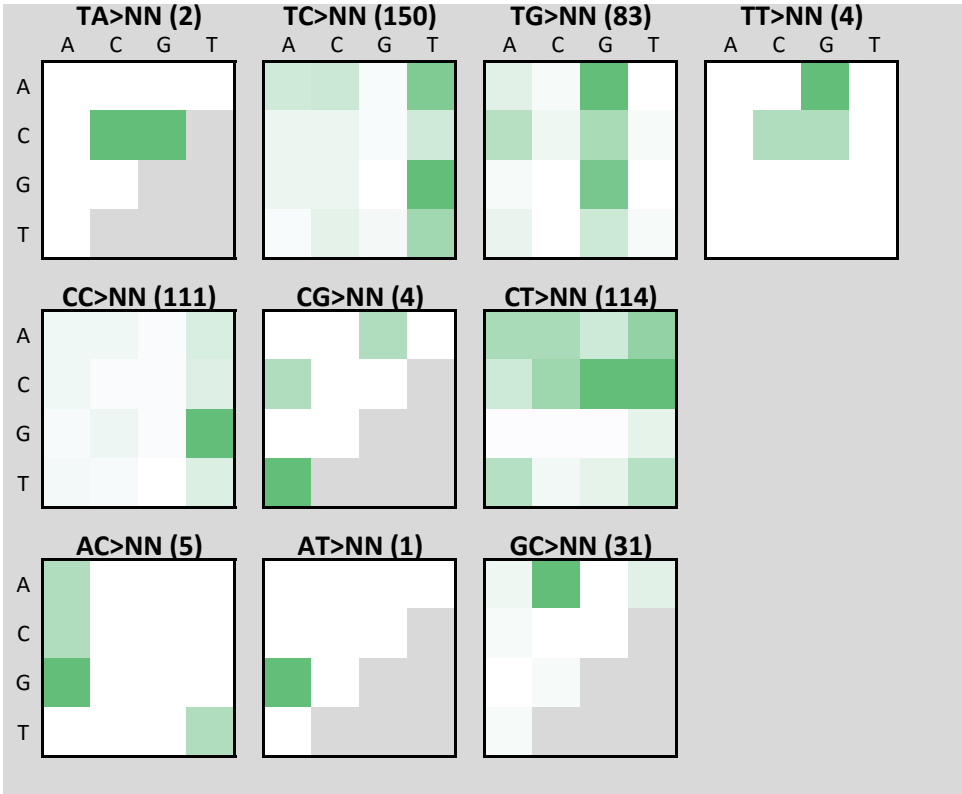

Flat (as if genome opportunity was equal for all tetranucleotides)

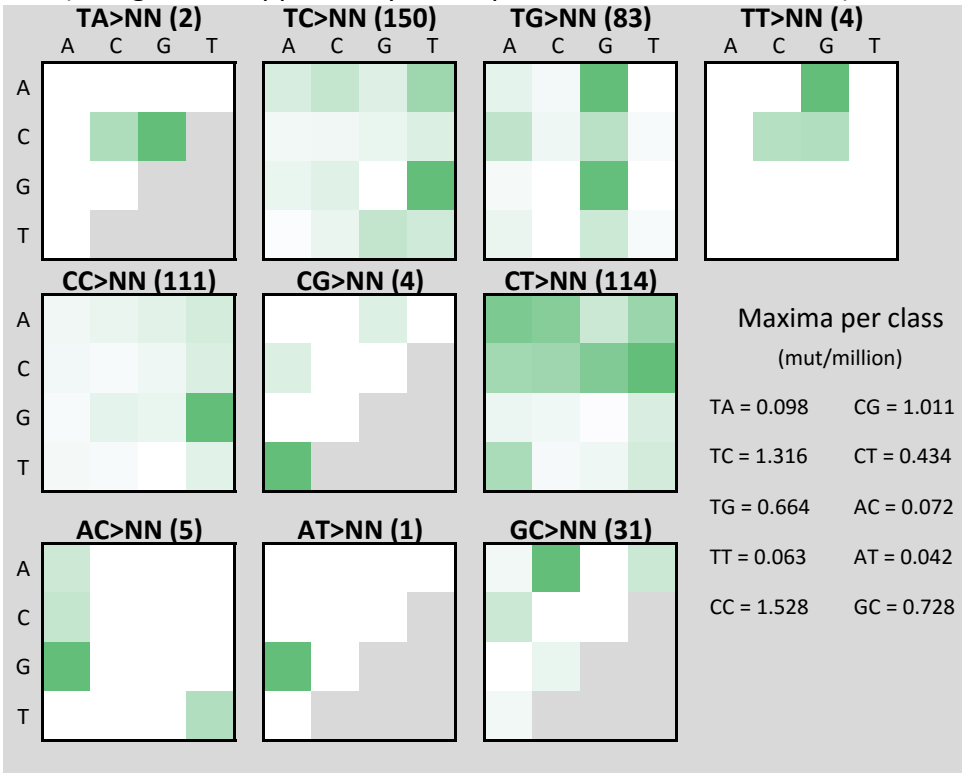

# HepG2\_Cis\_4

Raw counts (genome)

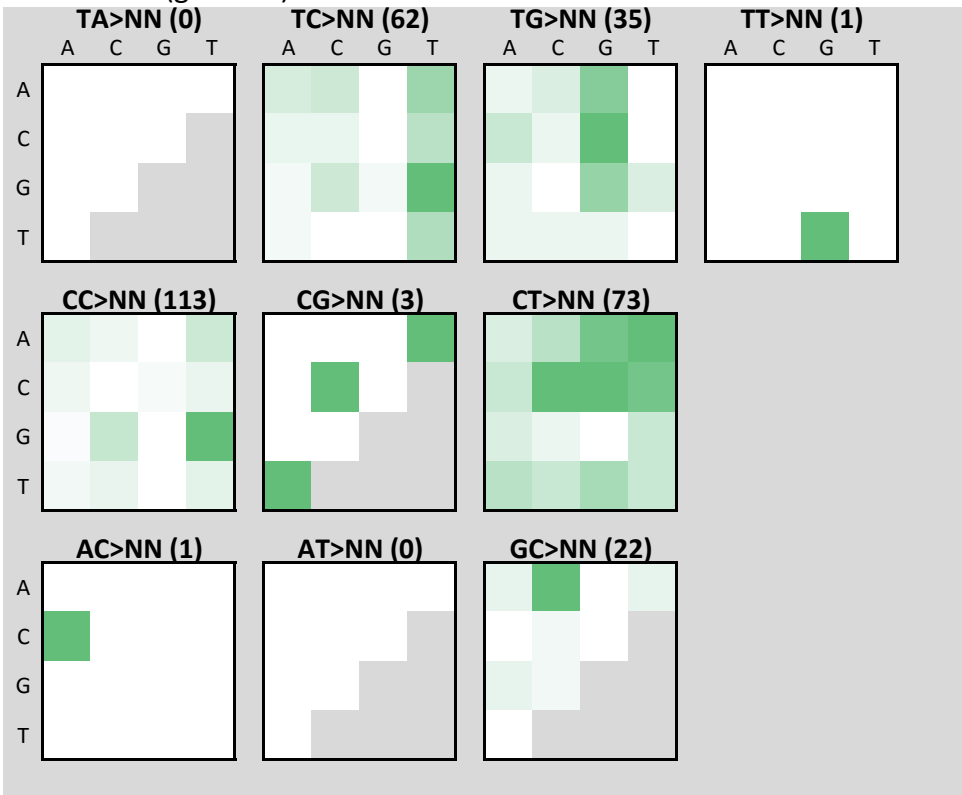

Flat (as if genome opportunity was equal for all tetranucleotides)

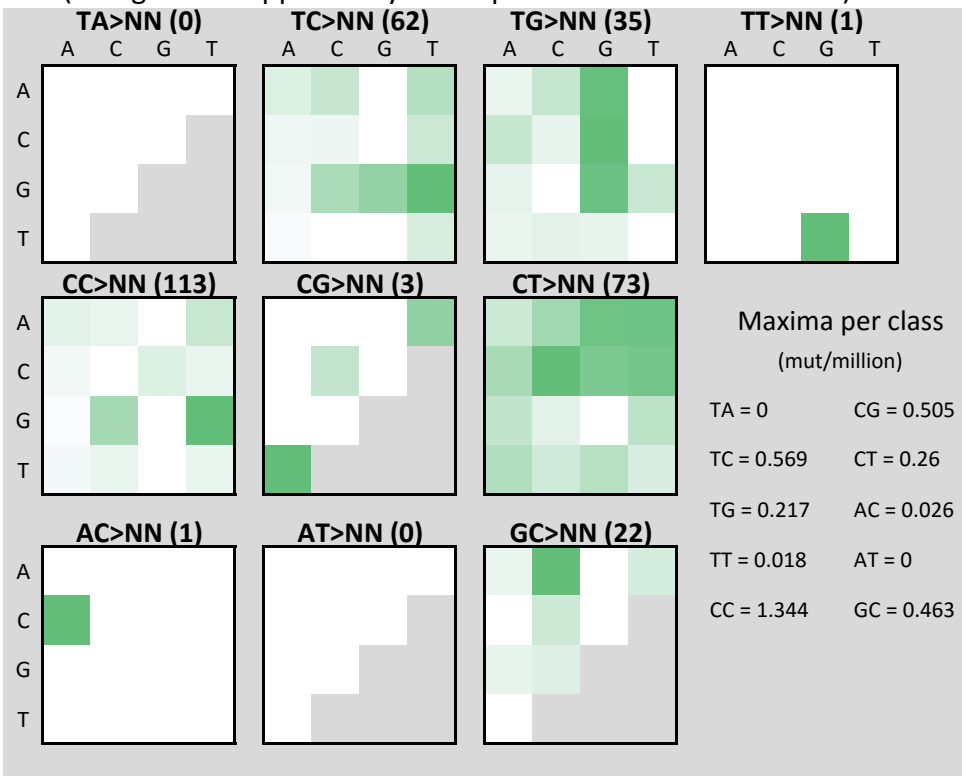

Supplemental Fig. S11: Graphical display of statistically significant enrichments and depletions of DNSs in tetranucleotide contexts for all MCF-10A (A) and HepG2 (B) clones combined. Binomial tests were performed as described in Materials and Methods. Results were summarized as either enriched for mutations (blue) or depleted for mutations (red) or no difference from expected (white). Dark green and red indicate sequence contexts that were significant after Bonferroni multiple testing correction (i.e.  $p < 0.05/136$ ). Light blue and pink indicate sequence contexts that were not significant after correction for multiple testing (i.e.  $0.05 > p > 0.05/136$ ).

### A: MCF-10A

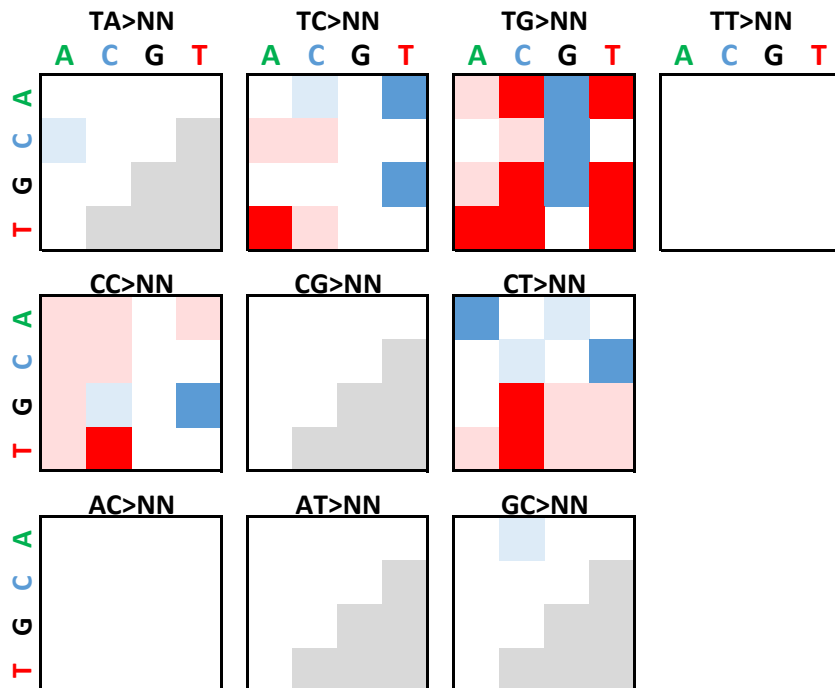

### B: HepG2

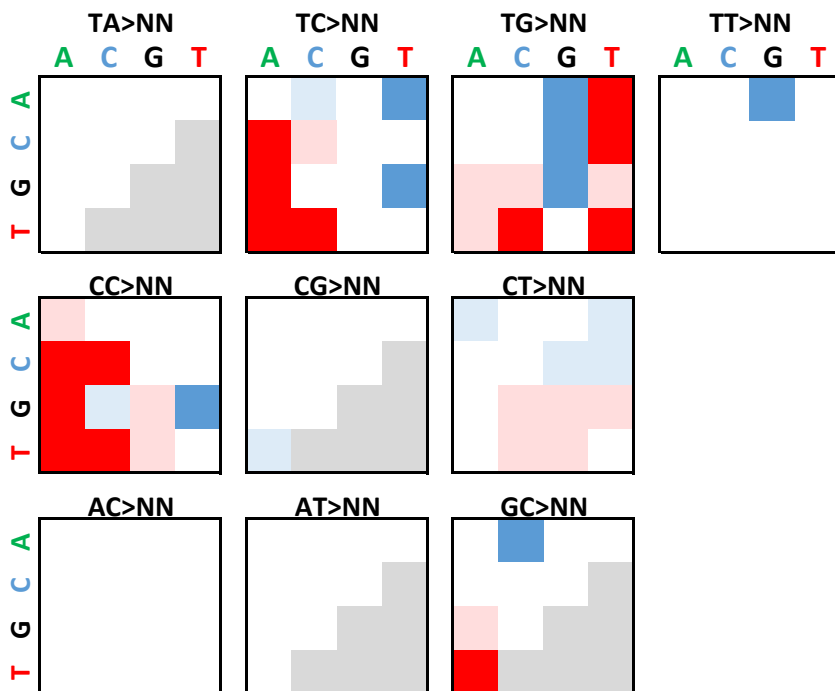

| Legend:                     |  |
|-----------------------------|--|
| Significant depletion       |  |
| Depletion, not significant  |  |
| No difference               |  |
| Enrichment, not significant |  |
| Significant enrichment      |  |
| see reverse complement      |  |

Supplemental Fig. S12: Example plots of DNS sequence context preference in 3 lung adenocarcinomas and 3 melanomas. The lung adenocarcinomas did not display very strong preference sequence context of DNSs. Conversely, in the melanomas most dinucleotides showed sequence context preference. For example, 52.8% of all CC mutations occurred TCCN context. Similarly, TT mutations preferentially occur in NTTA context (52.1%), and CT mutations showed extremely strong preference for a T either preceding or following the mutated dinucleotide (79.5%). The strongest tetranucleotide context preference was observed for TA mutations, which prefer ATAA context (46.9%), and CG mainly occur in TCGA context (50.4%).  
 Figure 10: Dinucleotide substitution sequence context for lung adenocarcinomas and melanomas

## LUAD-E00934

Raw counts (genome)

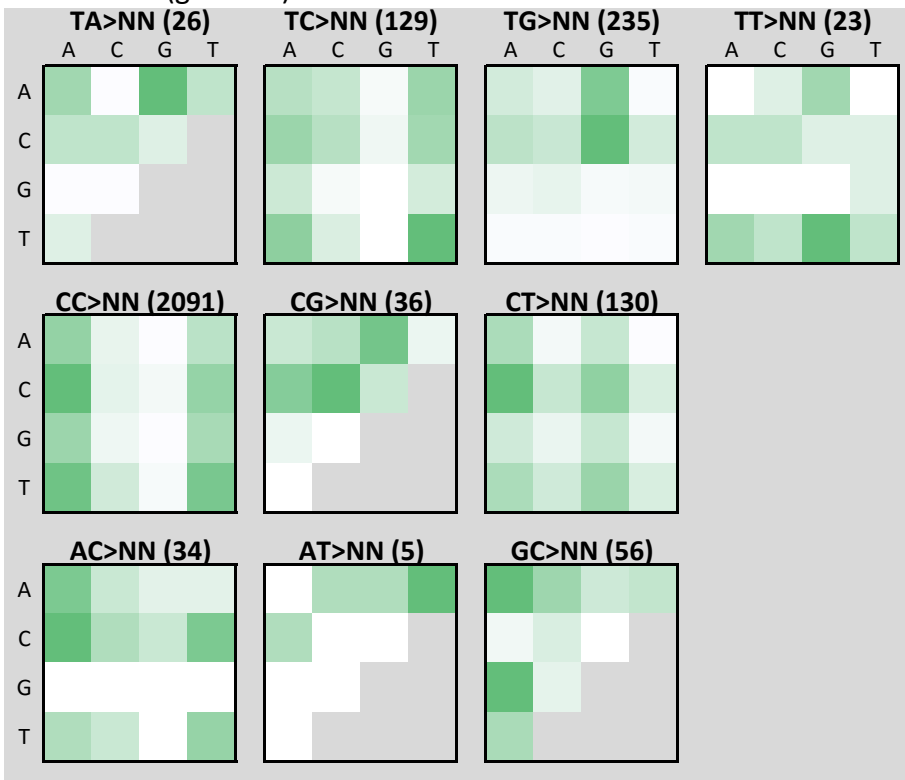

Flat (per million tetranucleotides)

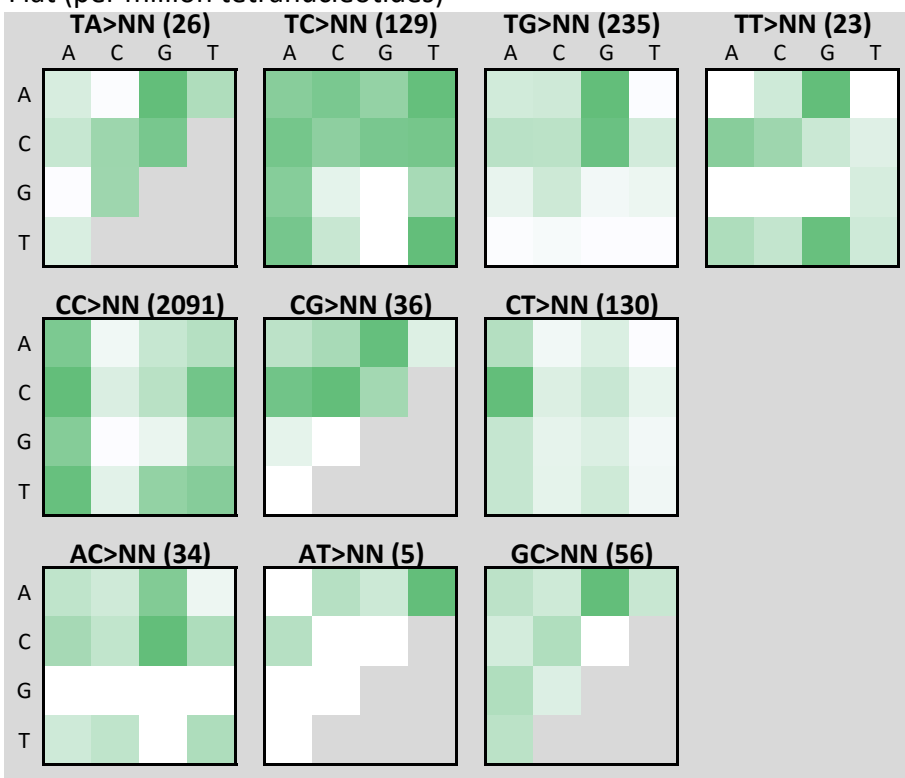

# LUAD-E01317

Raw counts (genome)

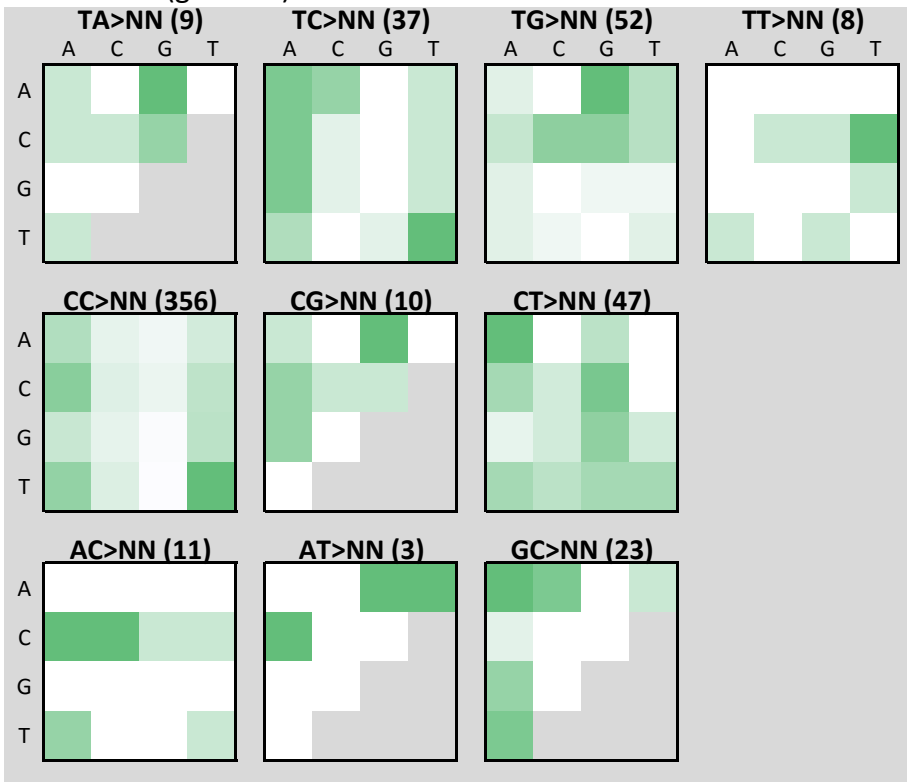

Flat (per million tetranucleotides)

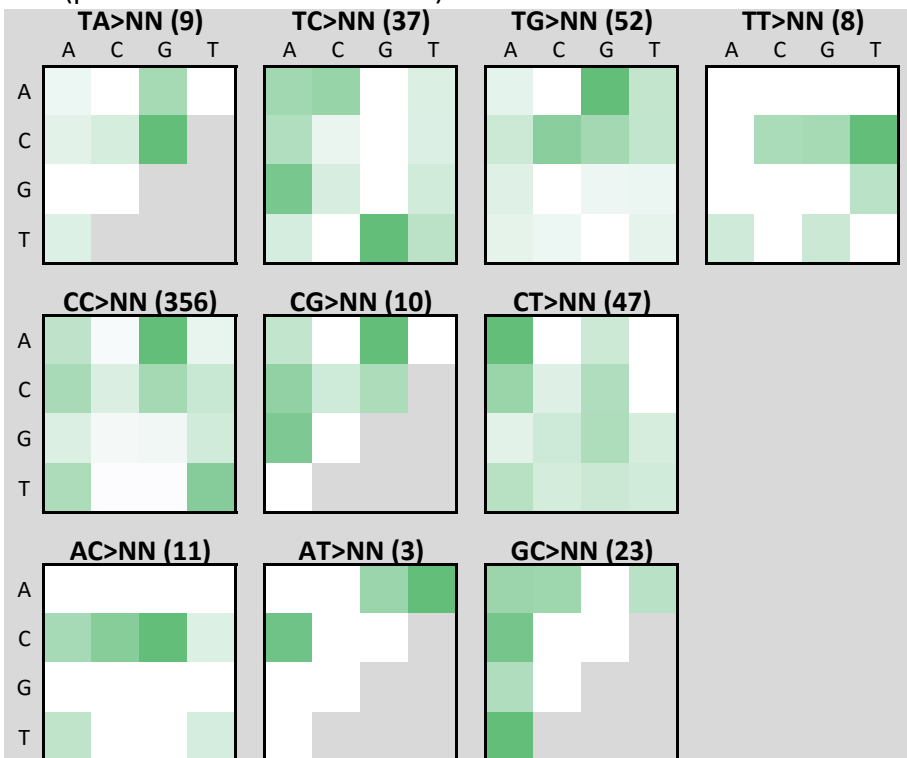





# MELA\_0165

Raw counts (genome)

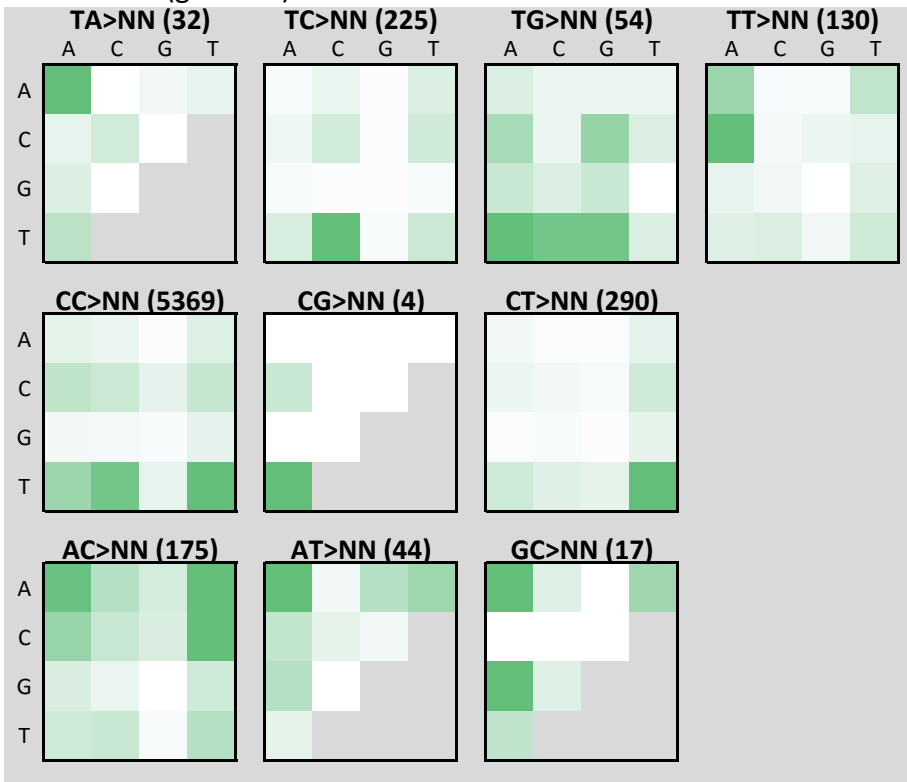

Flat (per million tetranucleotides)

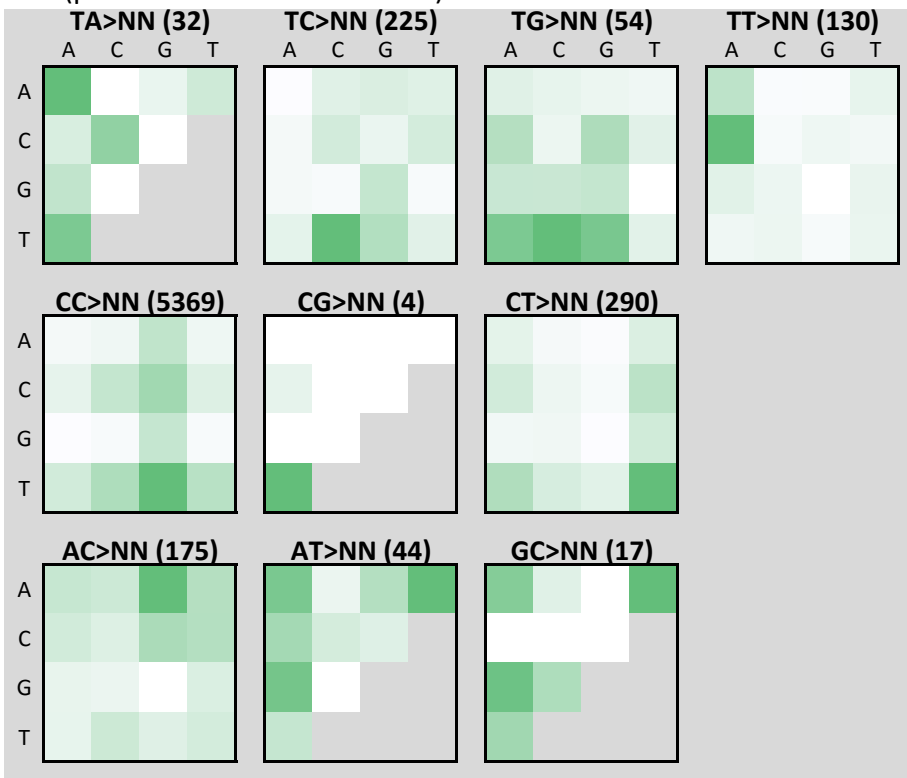

# MELA\_0247

Raw counts (genome)

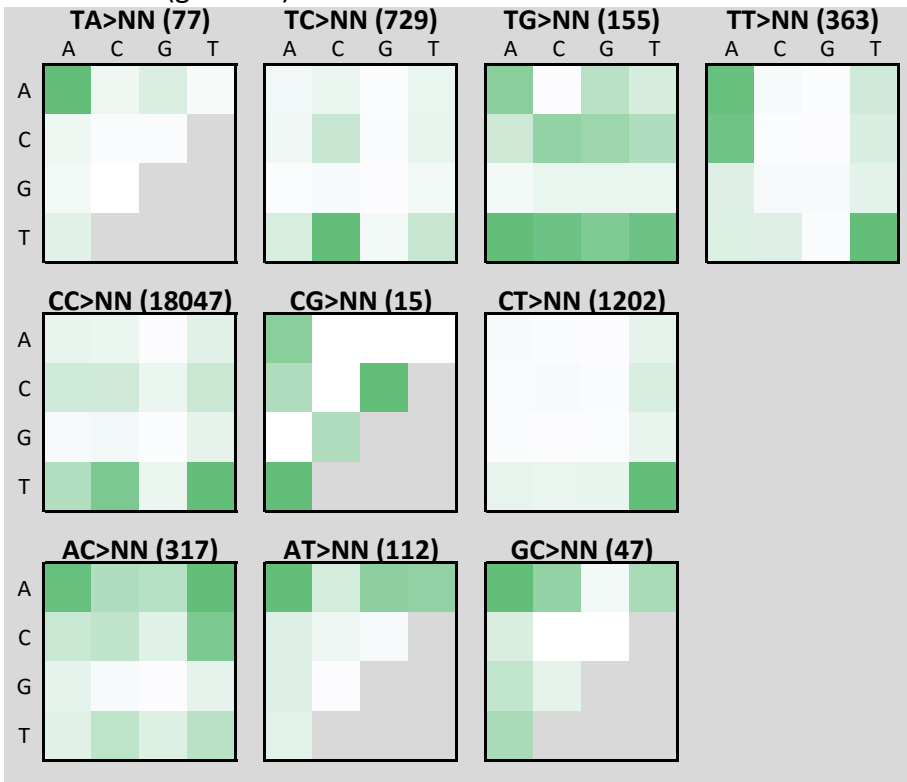

Flat (per million tetranucleotides)

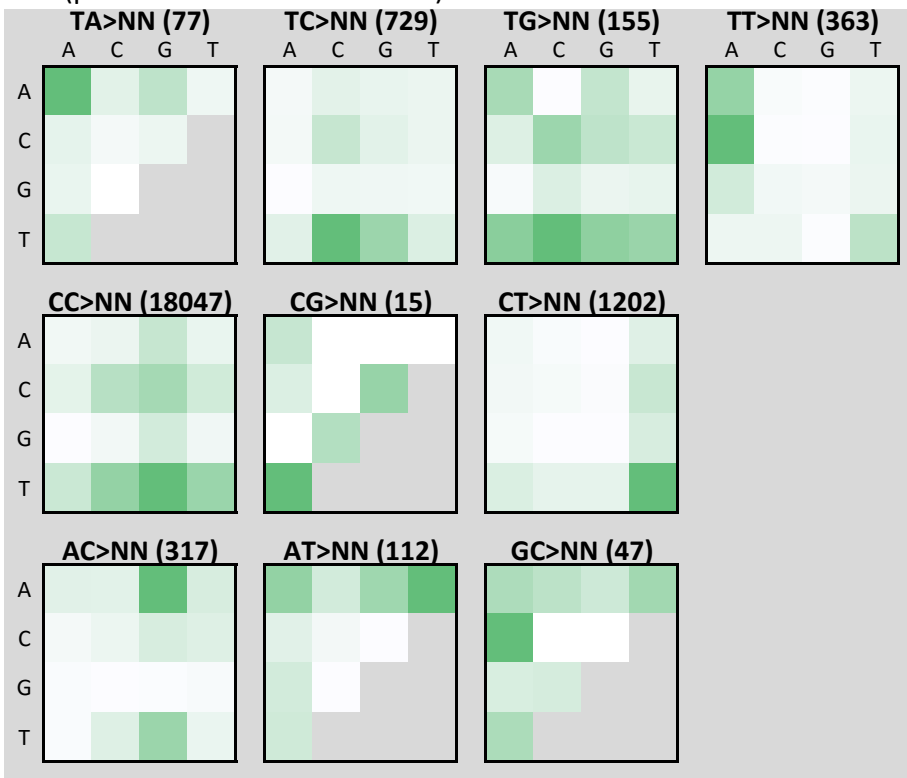

# MELA\_0255

Raw counts (genome)

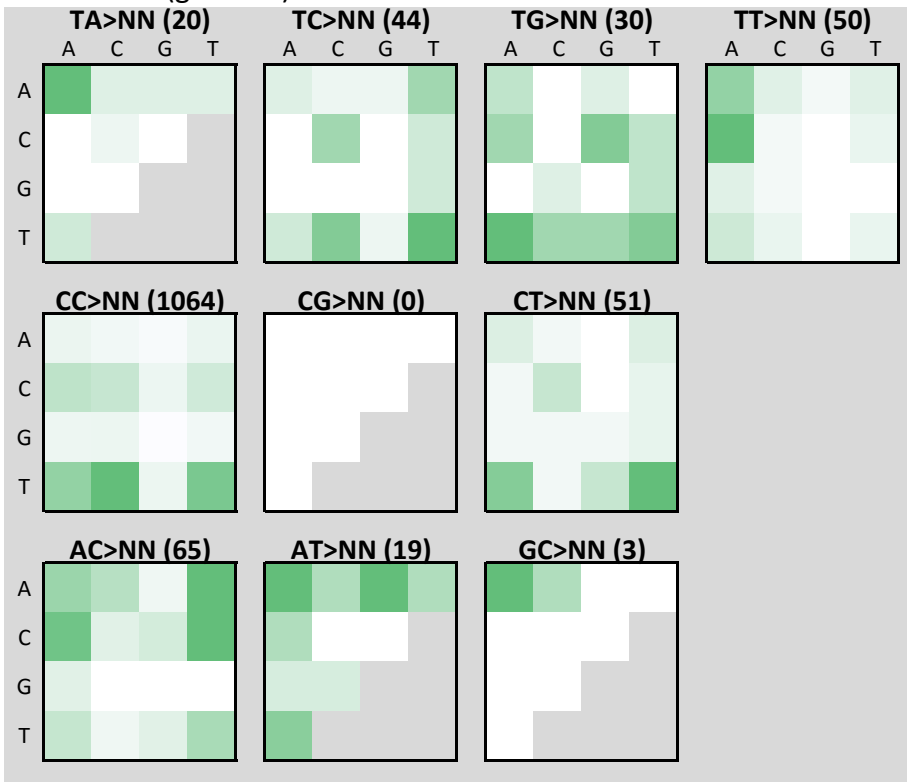

Flat (per million tetranucleotides)

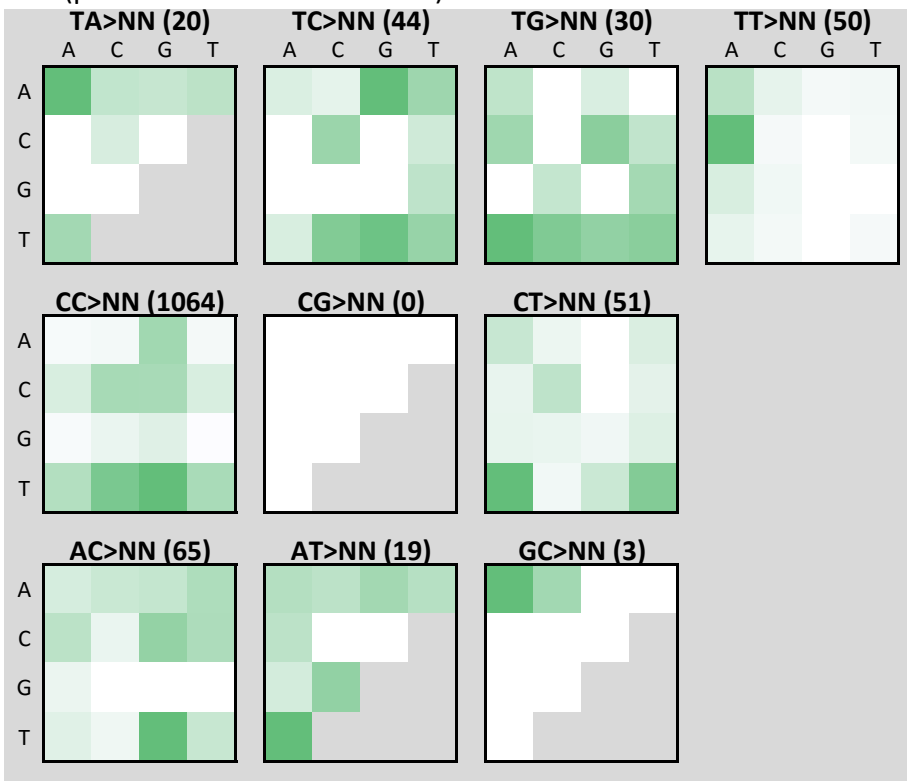

Supplemental Fig. S13: Transcription strand bias of DNSs in cisplatin treated MCF-10A and HepG2 clones. The total number of dinucleotides eligible for transcription strand bias analysis is displayed in parentheses.

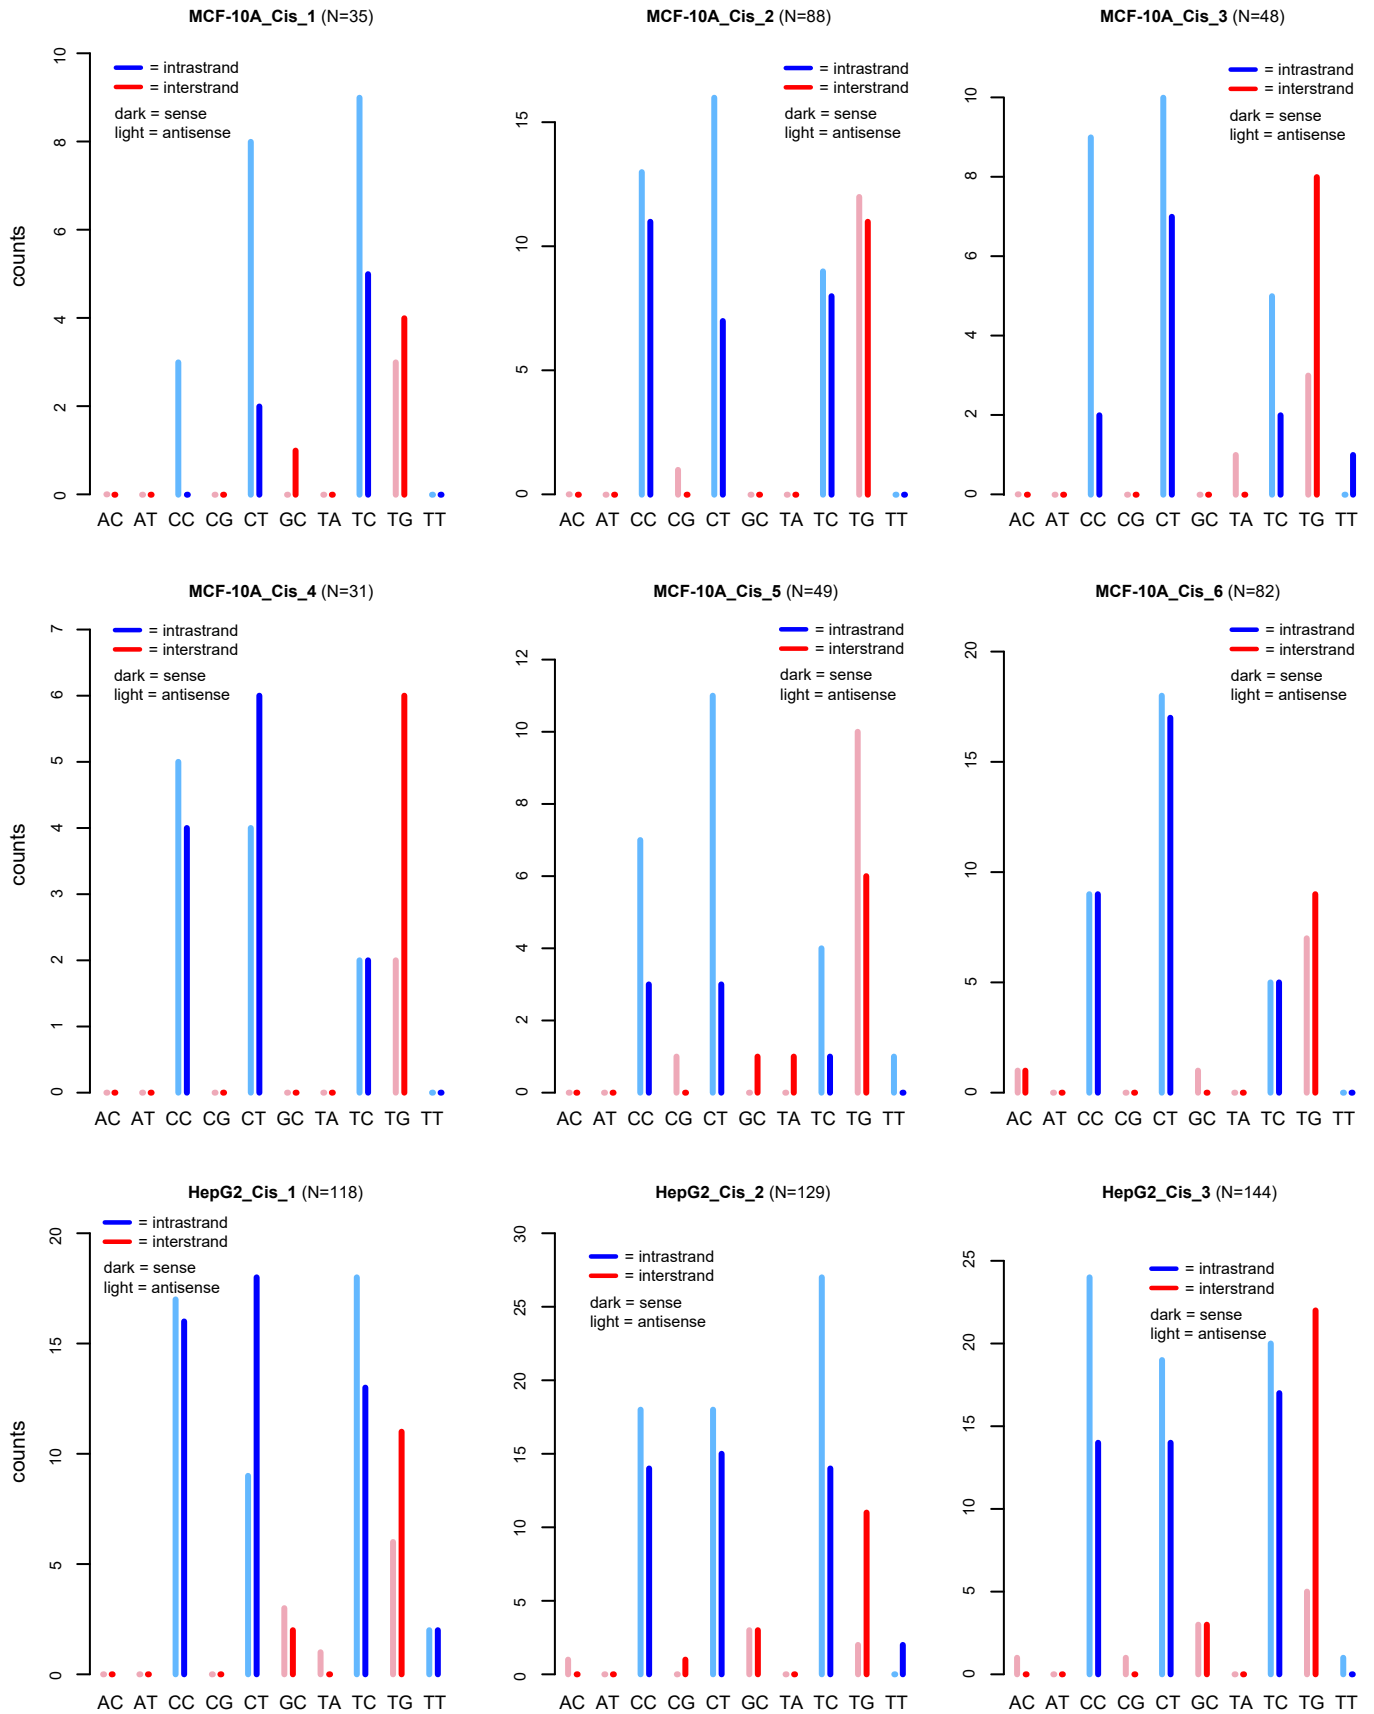

HepG2\_Cis\_4 (N=96)

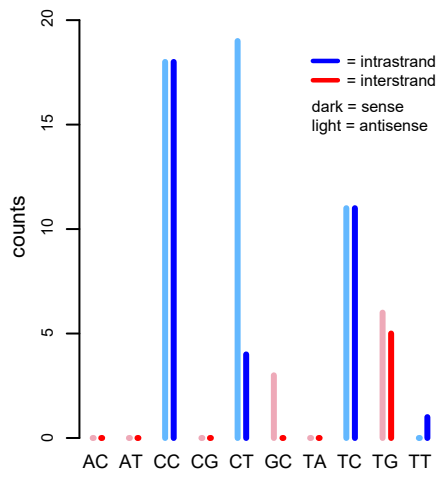

Supplemental Fig. S14: Transcription strand bias of DNSs in 3 lung adenocarcinomas and 3 melanomas. Contrary to the cisplatin DNSs, both the smoking and UV associated DNSs displayed transcription strand bias. The UV associated dinucleotides showed a decrease of CC>TT mutations on the transcribed strand, as CC crosslinks induced by UV are repaired by TC-NER. Similarly, smoking associated dinucleotides showed transcription strand bias with a decrease of CC>AA mutations on the untranscribed strand. This fits the prior knowledge that smoking causes GG intrastrand crosslinks, which are repaired by TC-NER if they are located on the transcribed strand. As we display the DNSs as CC>AA, the strand bias is reversed.

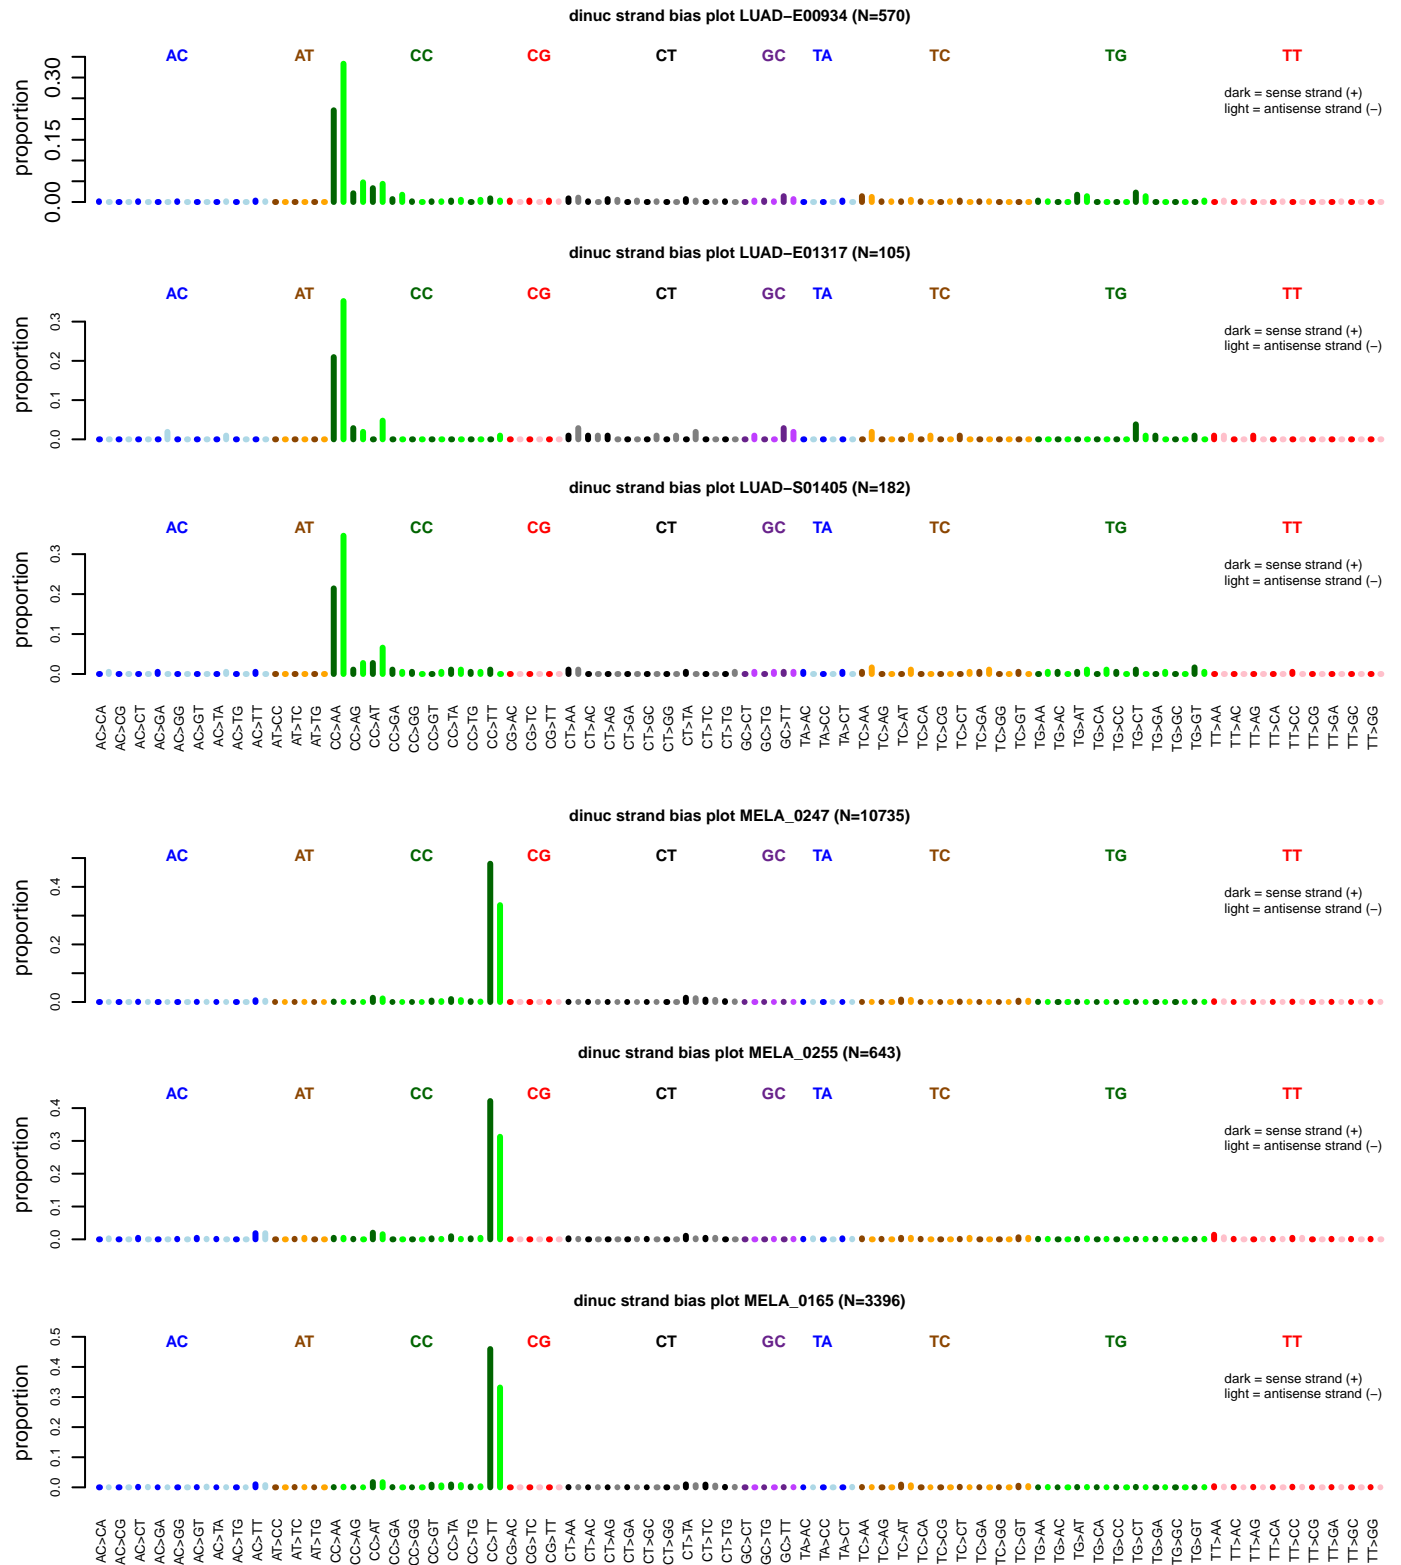

Supplemental Fig. S15: Mutation density in regions with histone modifications, relative to the mutation density of each respective sample (Supplementary Table 1). Plotted is the average for all 10 clones  $\pm$  SEM.

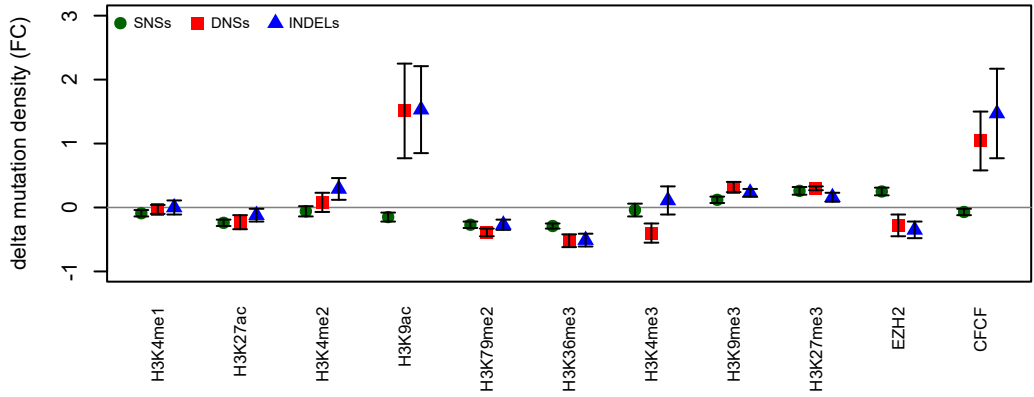



Supplemental Fig. S16: Indel mutation patterns.

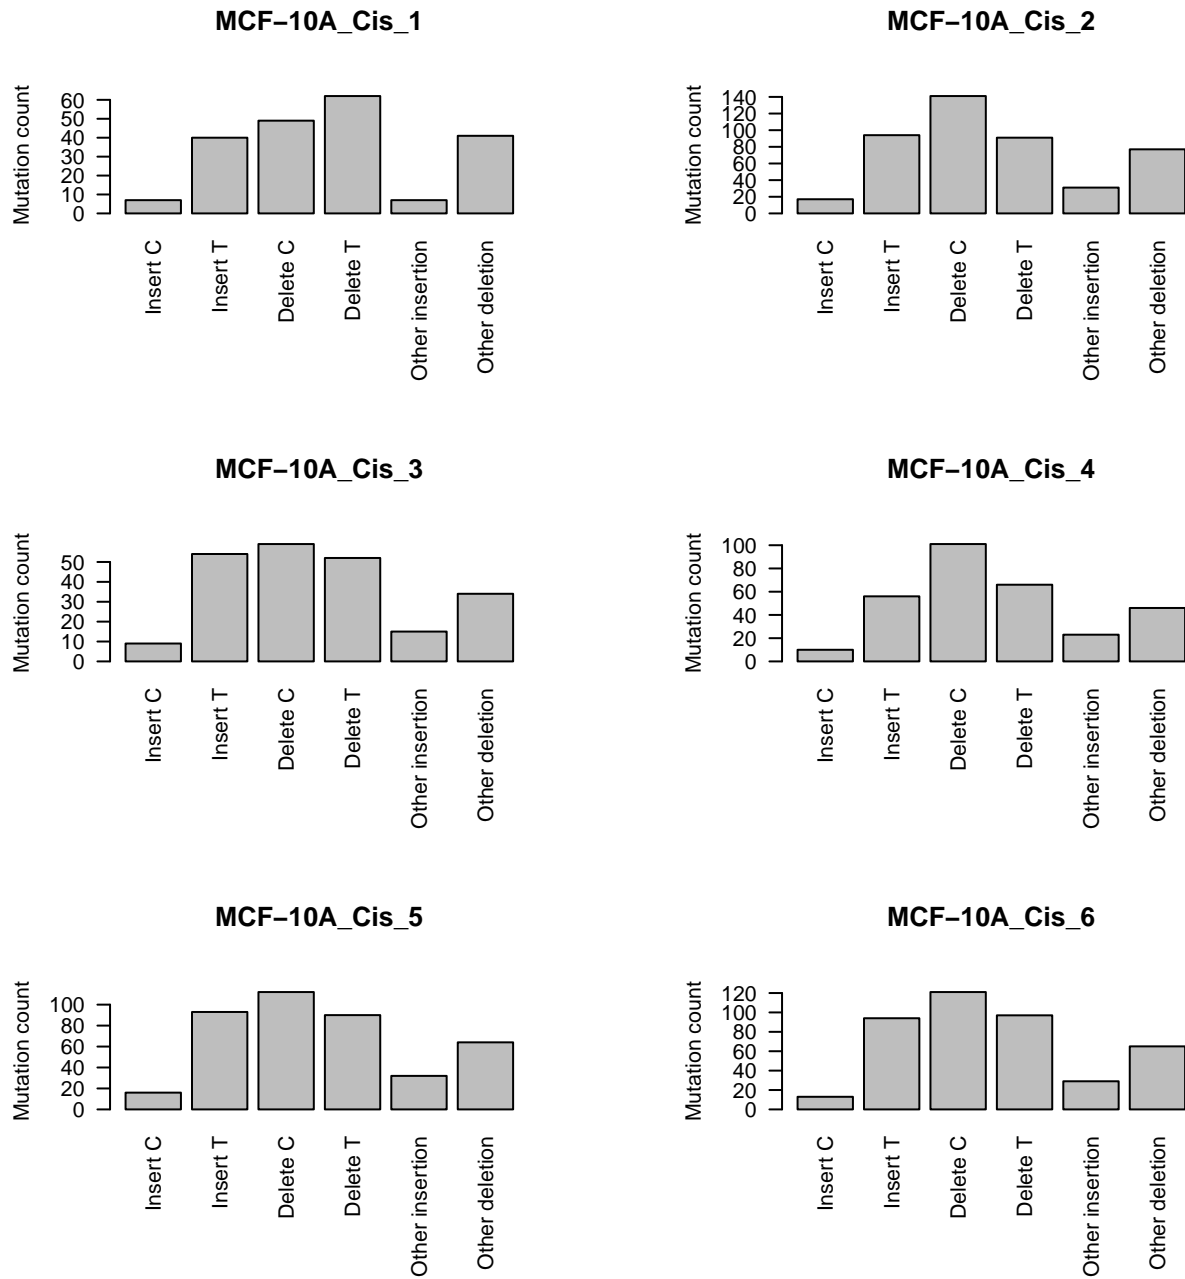

Supplemental Fig. S16: Indel mutation patterns, continued.

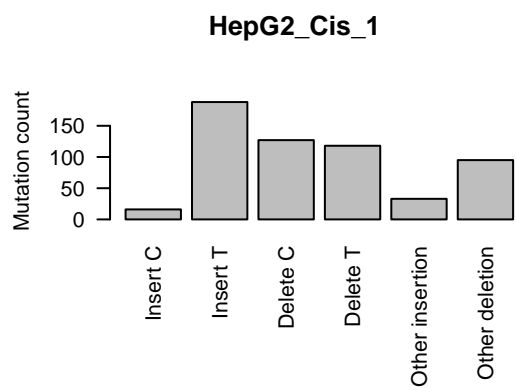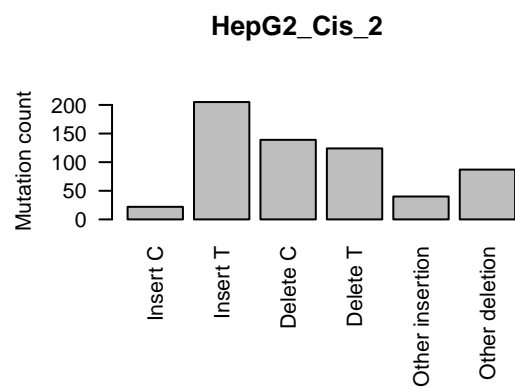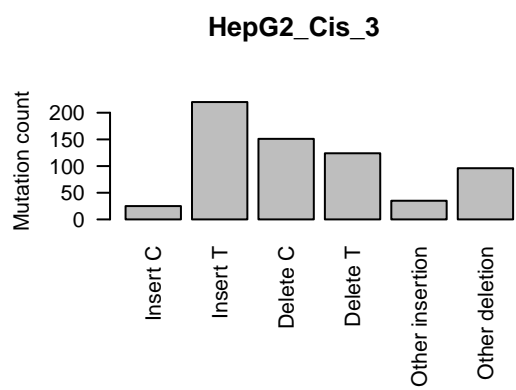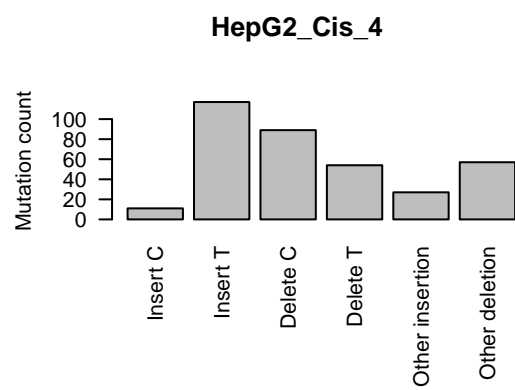

Supplemental Fig. S17: Copy number analysis of cisplatin treated cell line clones. For each cisplatin treated cell line clone and the untreated cell lines, we plotted the copy number (black) and beta-allele frequency (individual datapoints in blue and segmented in red).

**HepG2 untreated**

**MCF-10A untreated**

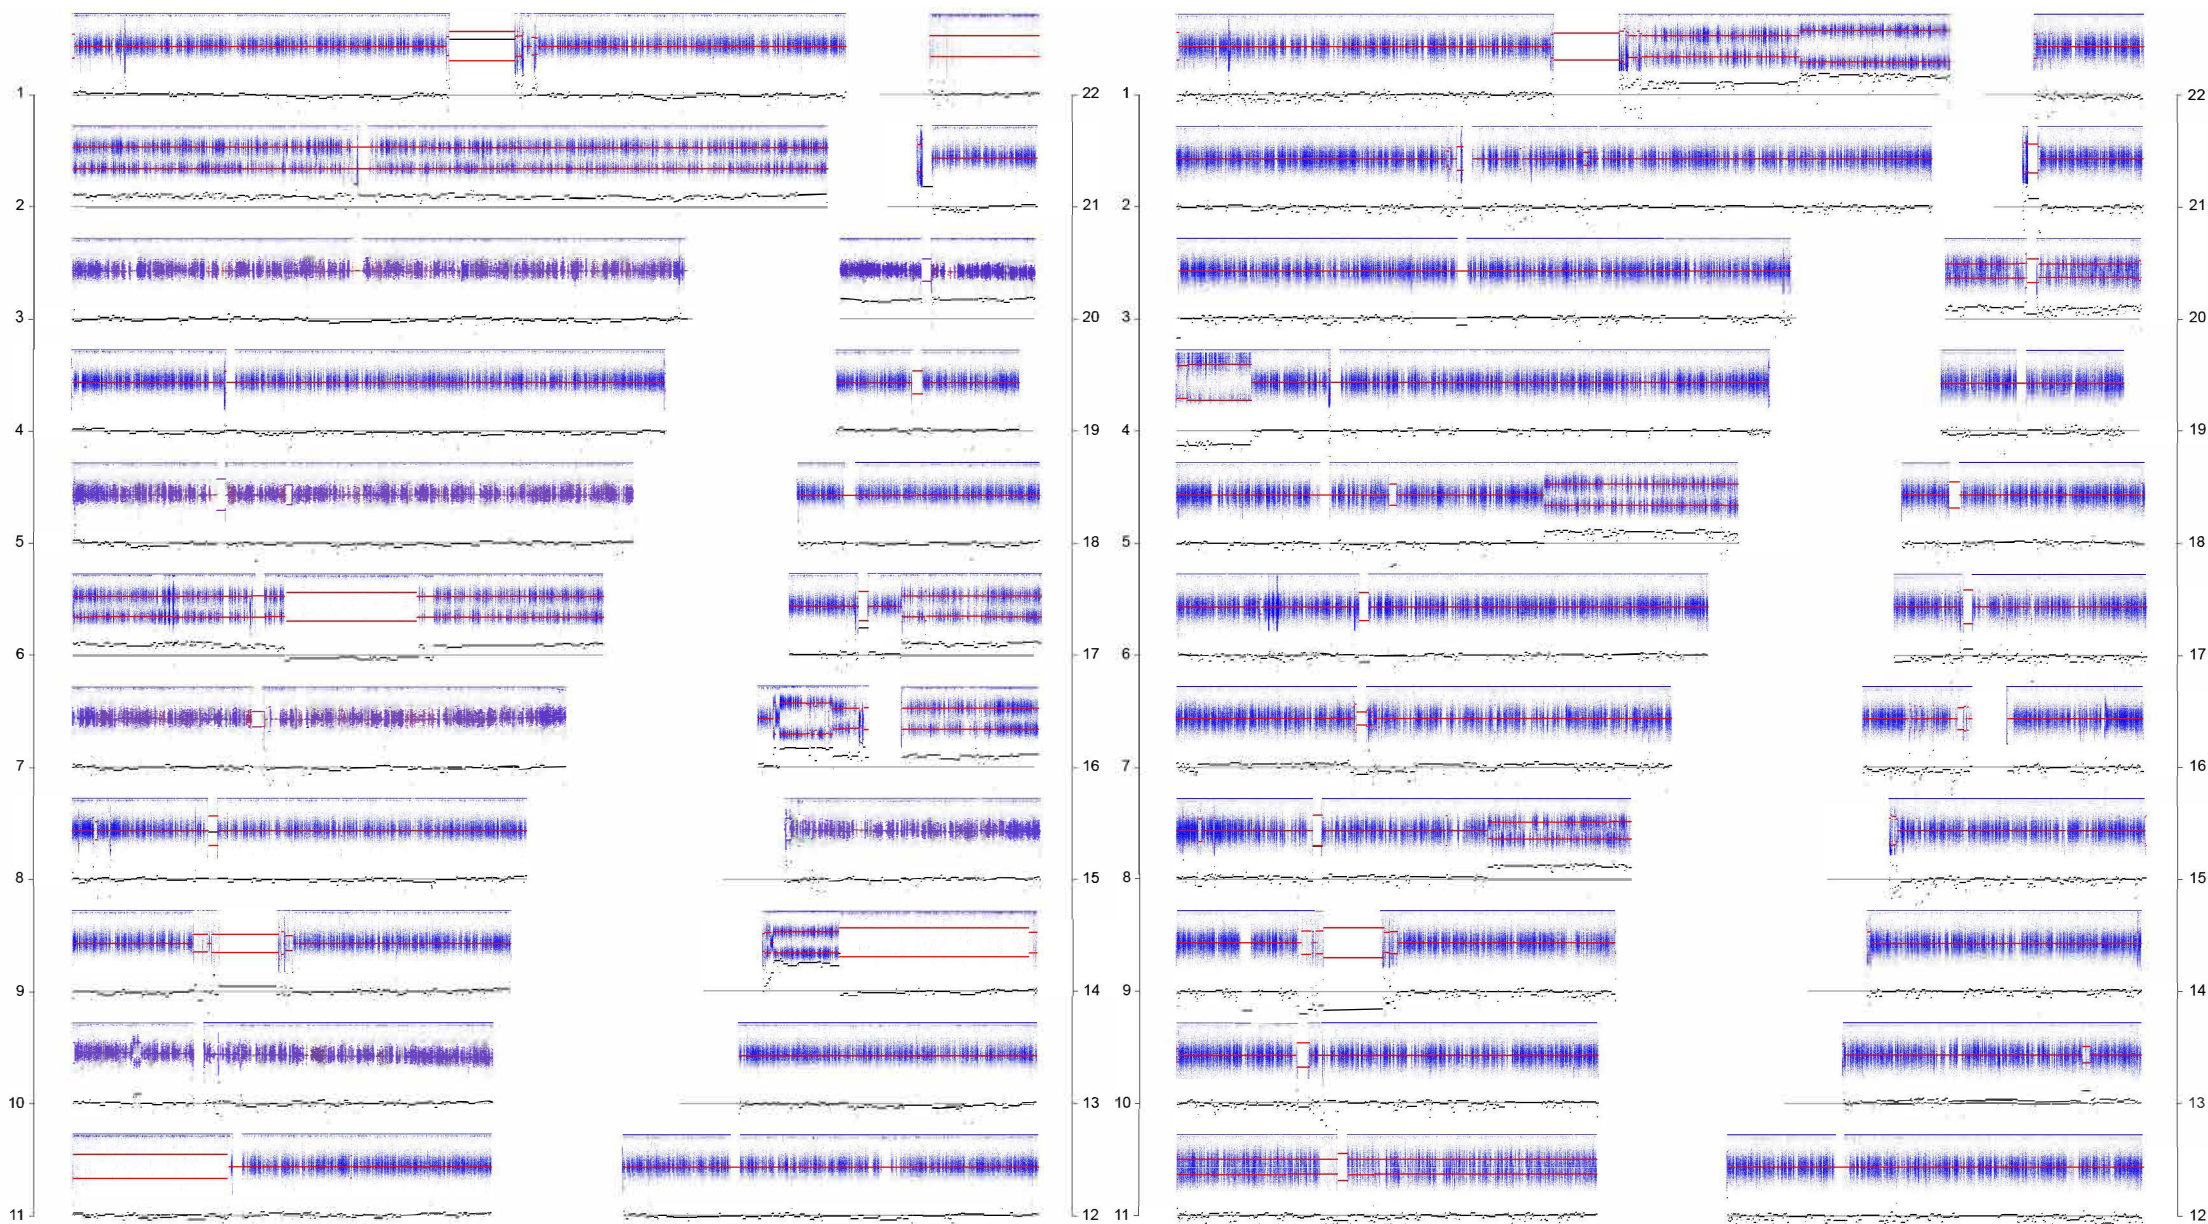

MCF-10A\_Cis\_1

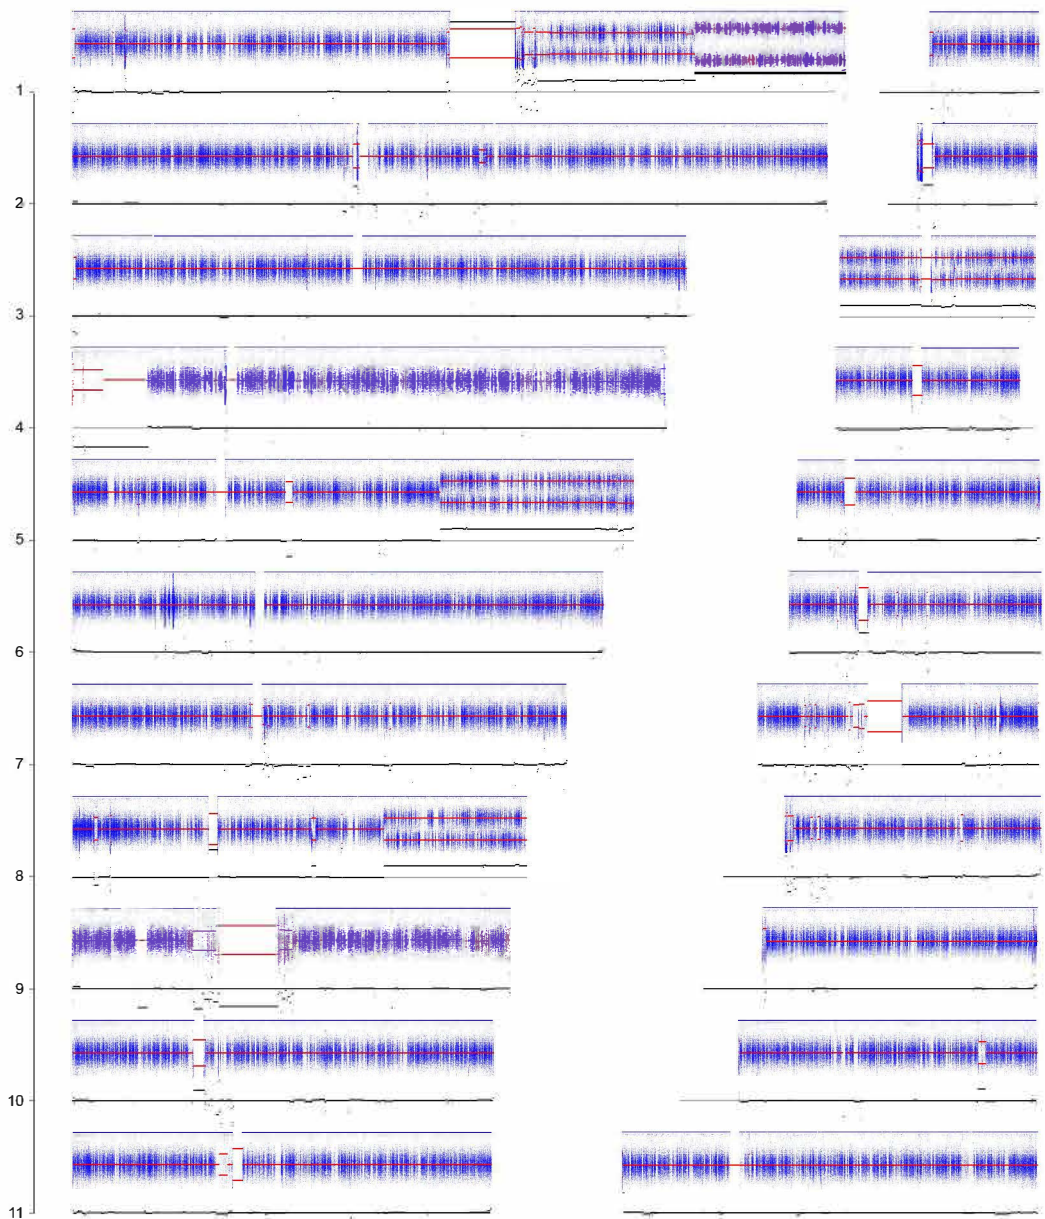

MCF-10A\_Cis\_2

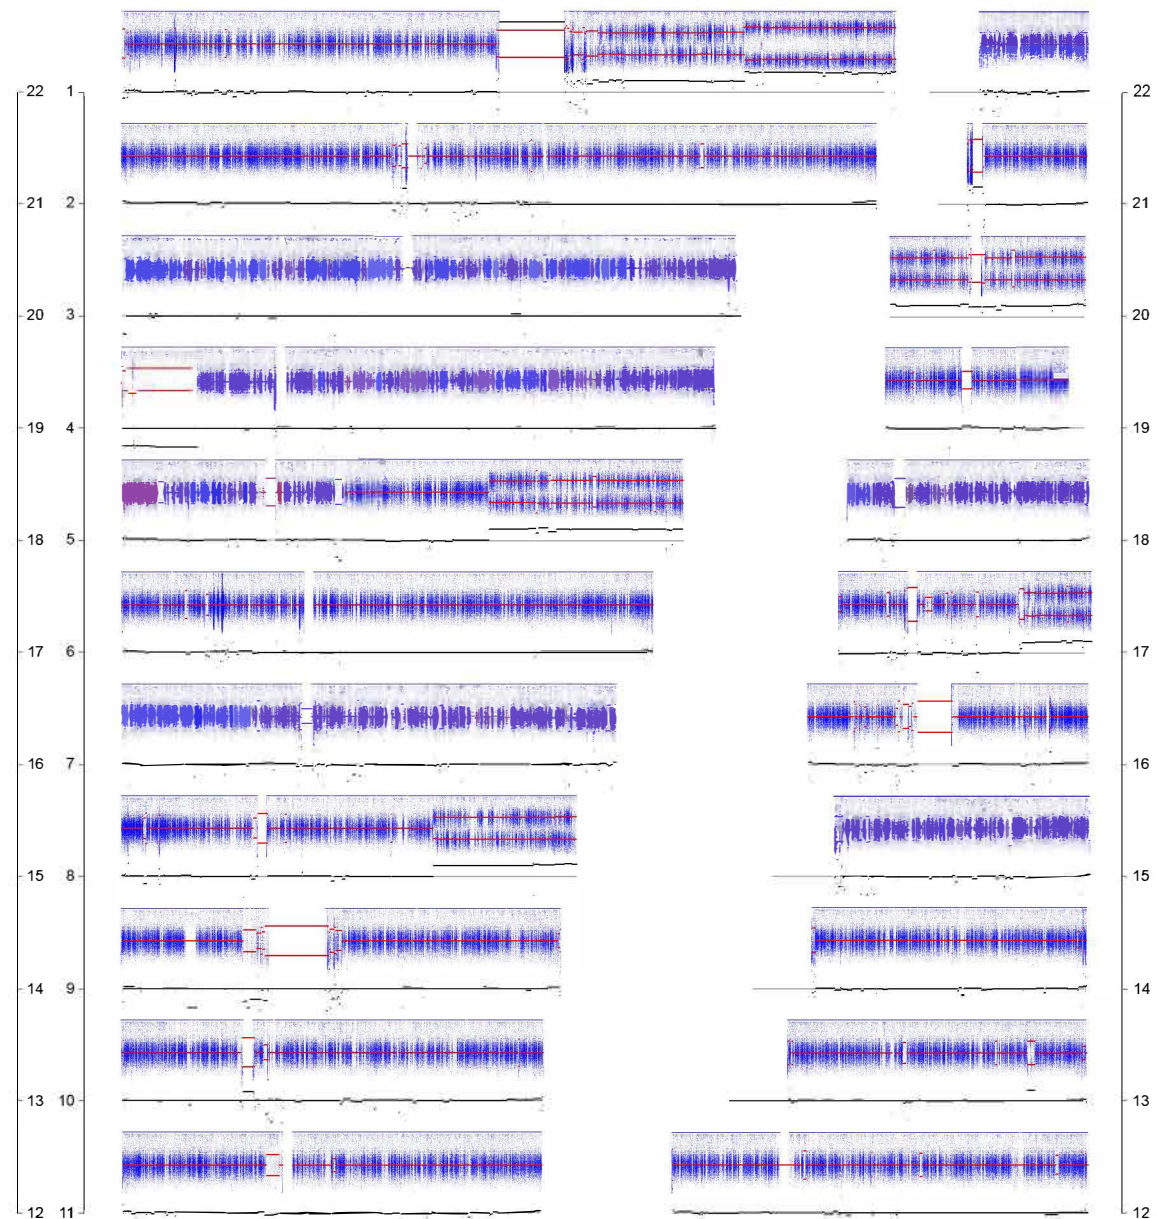

MCF-10A\_Cis\_3

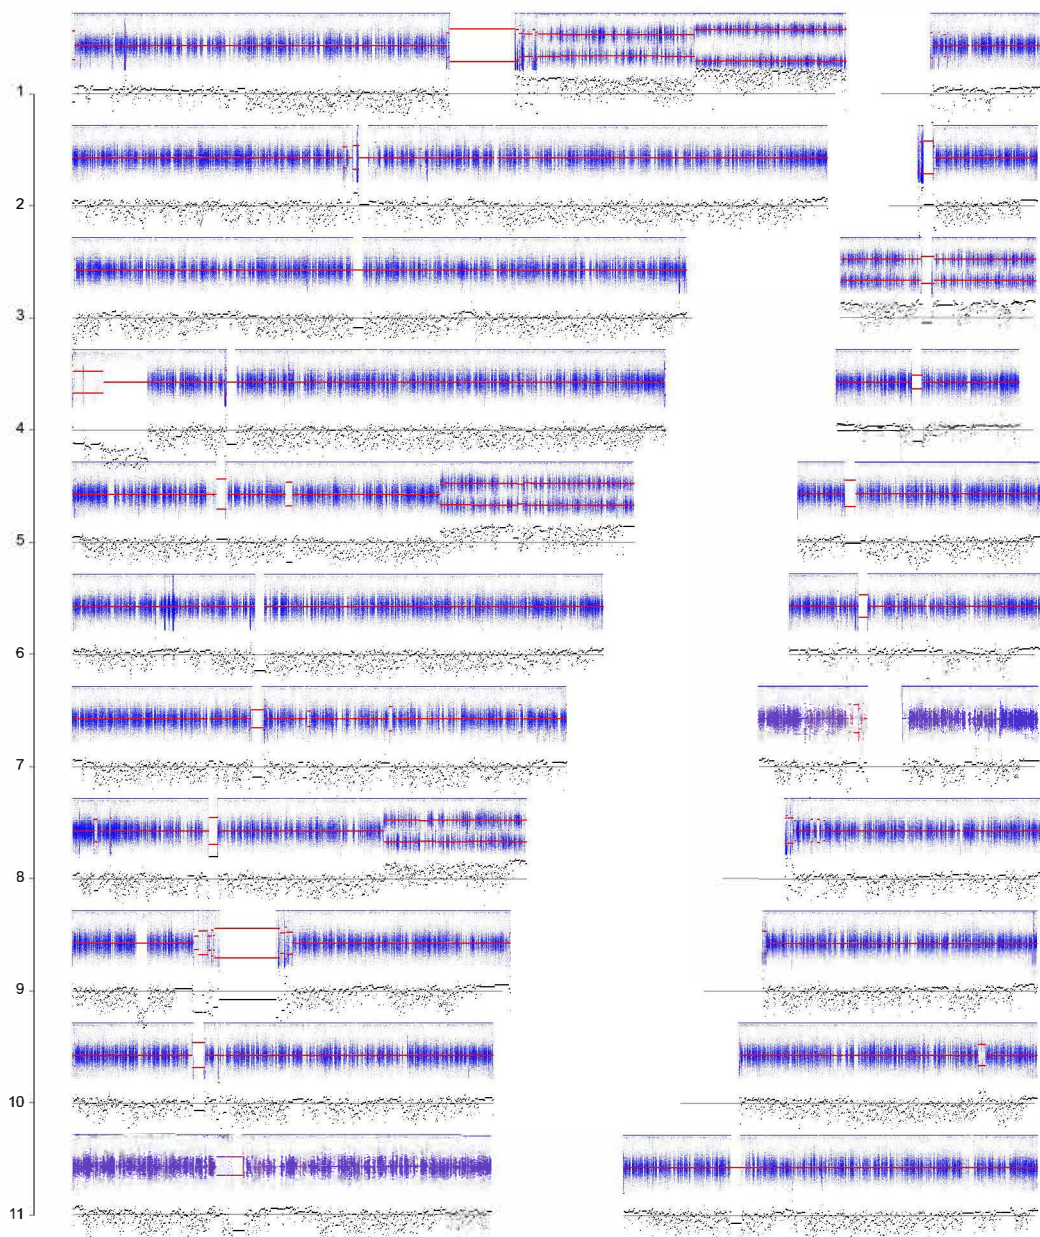

MCF-10A\_Cis\_4

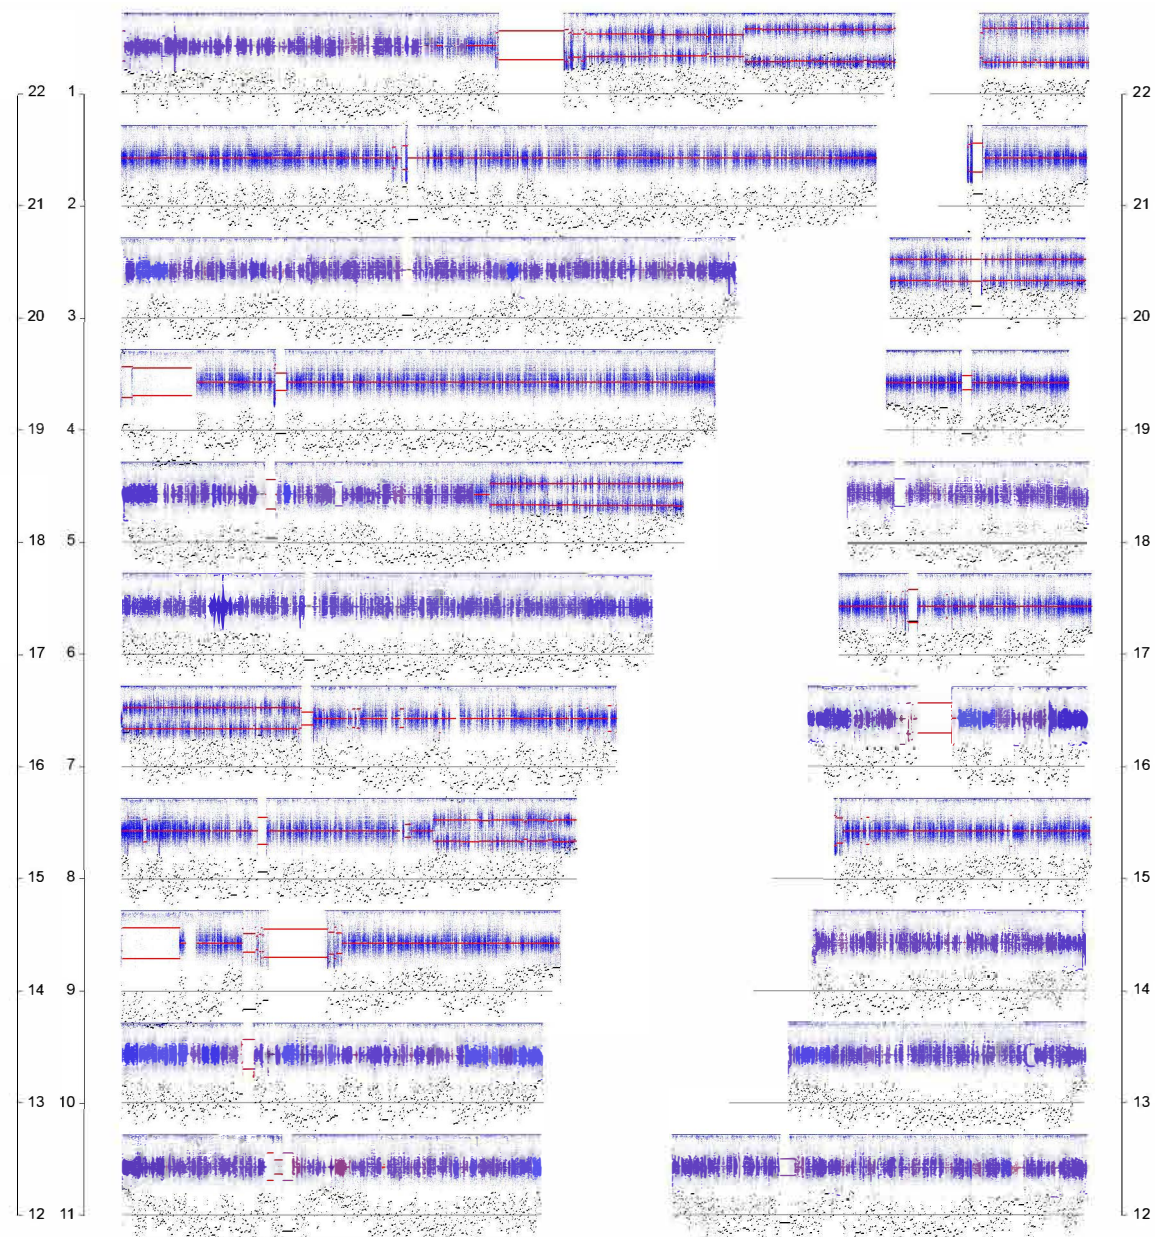

MCF-10A\_Cis\_5

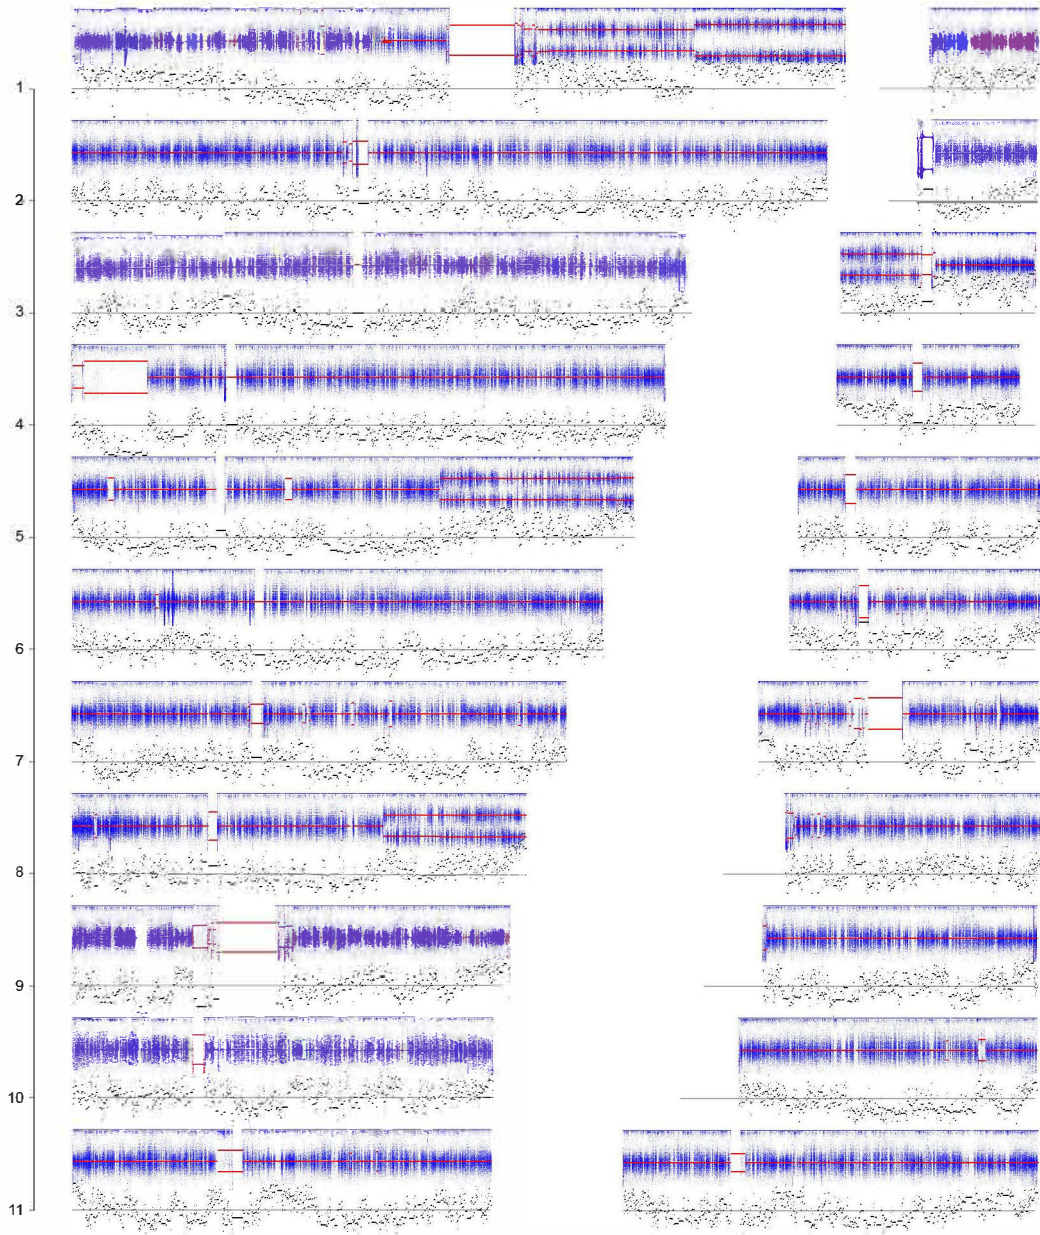

MCF-10A\_Cis\_6

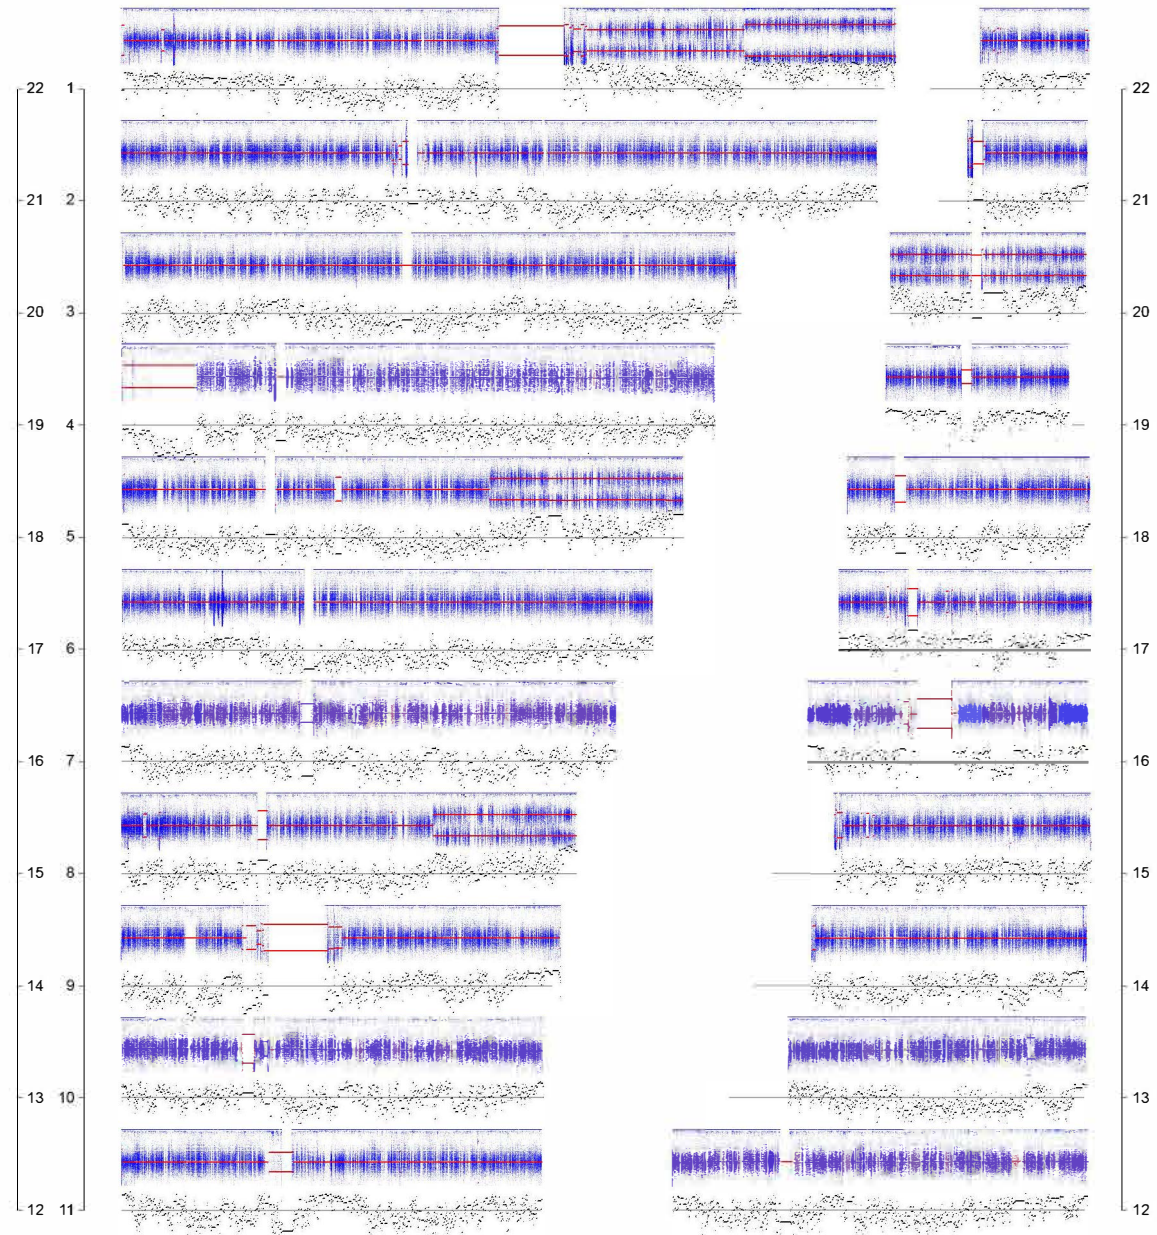

HepG2\_Cis\_1

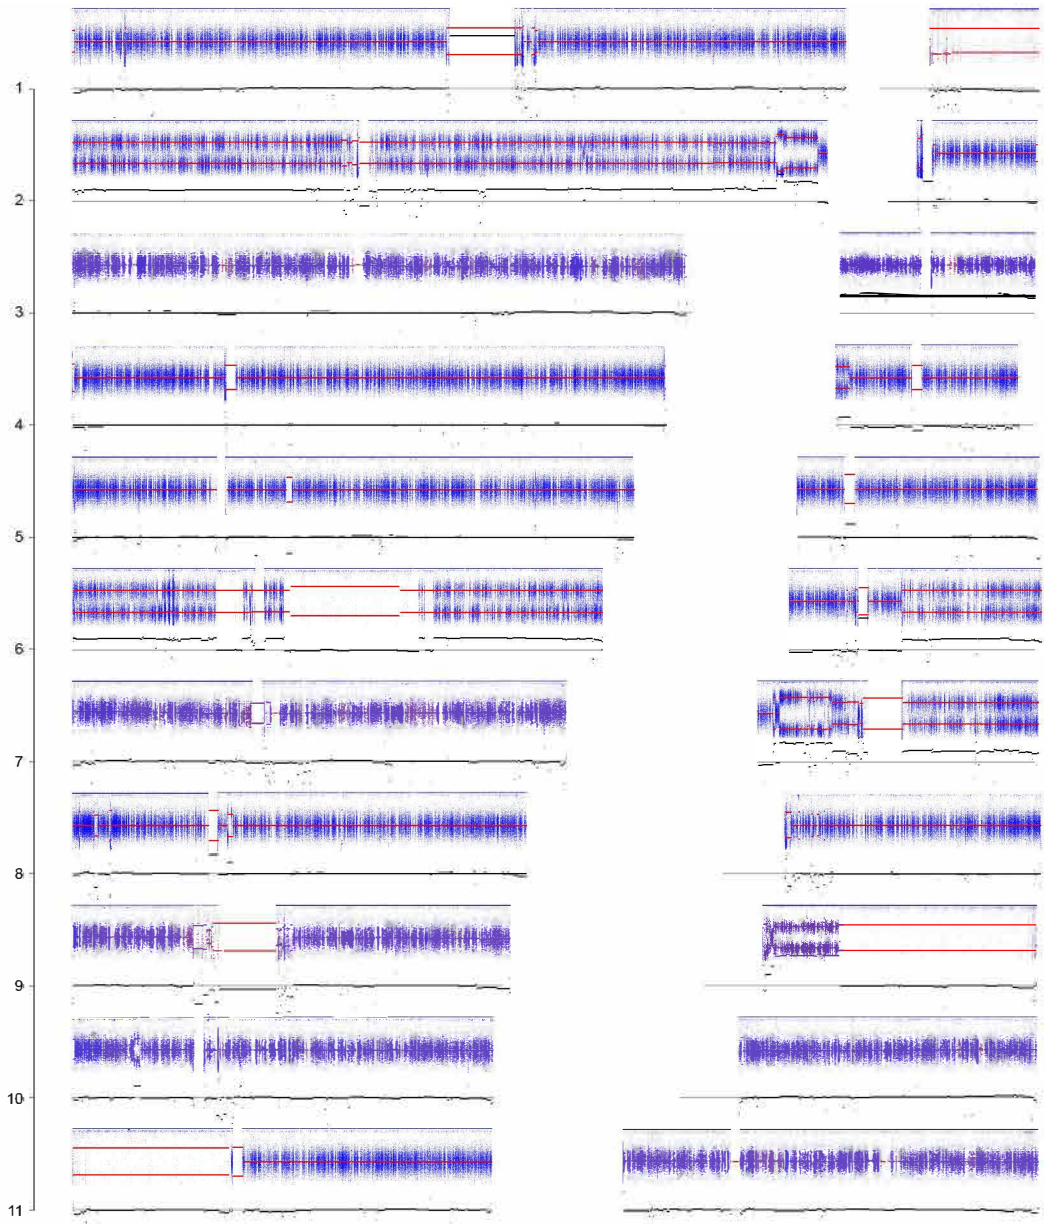

HepG2\_Cis\_2

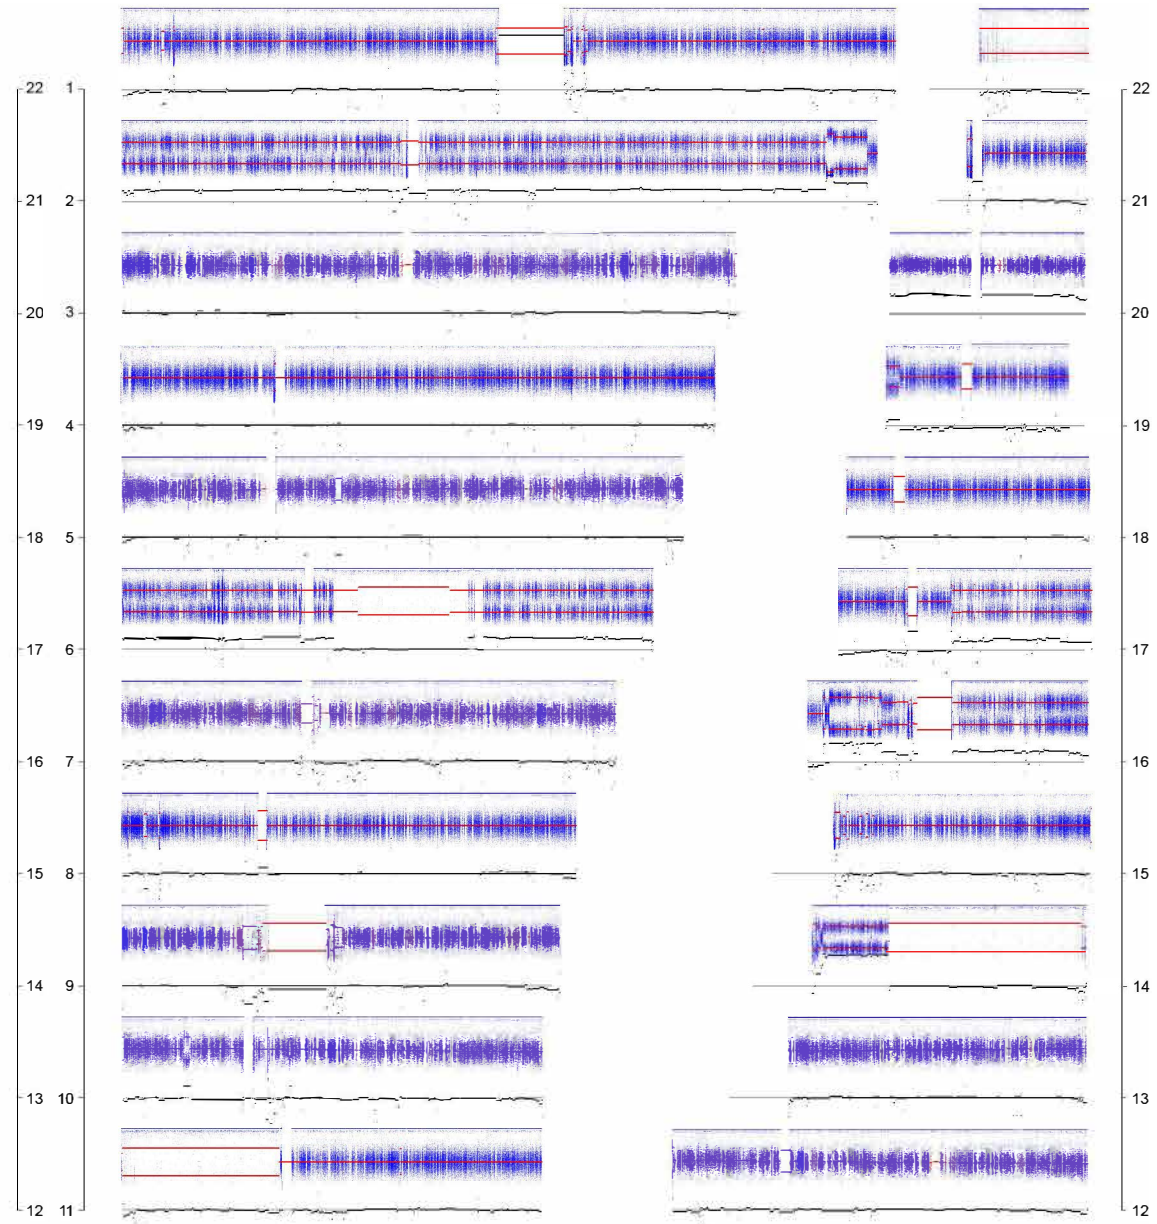

HepG2\_Cis\_3

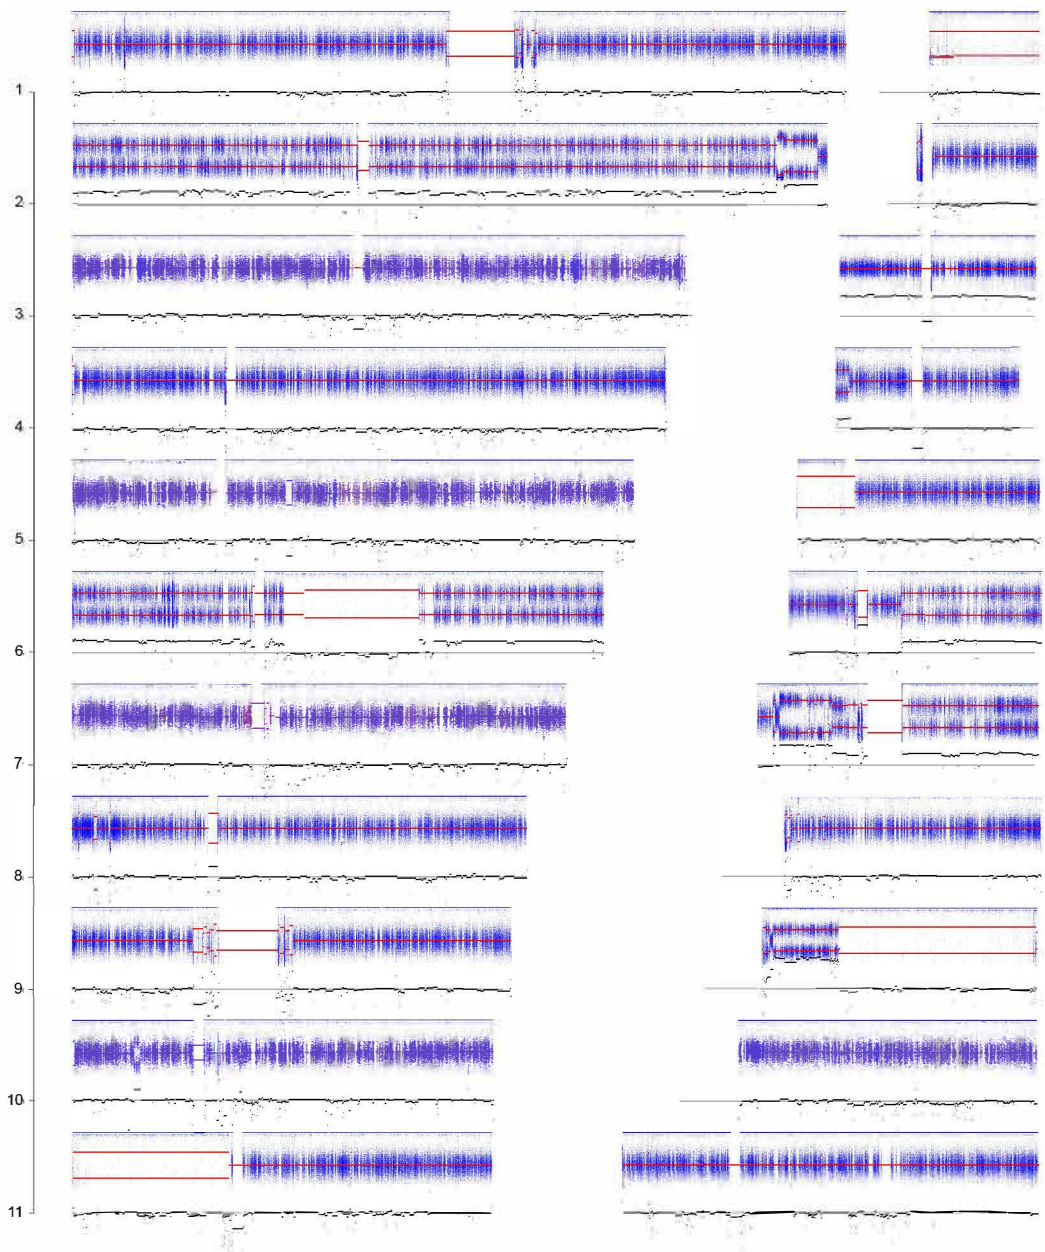

HepG2\_Cis\_4

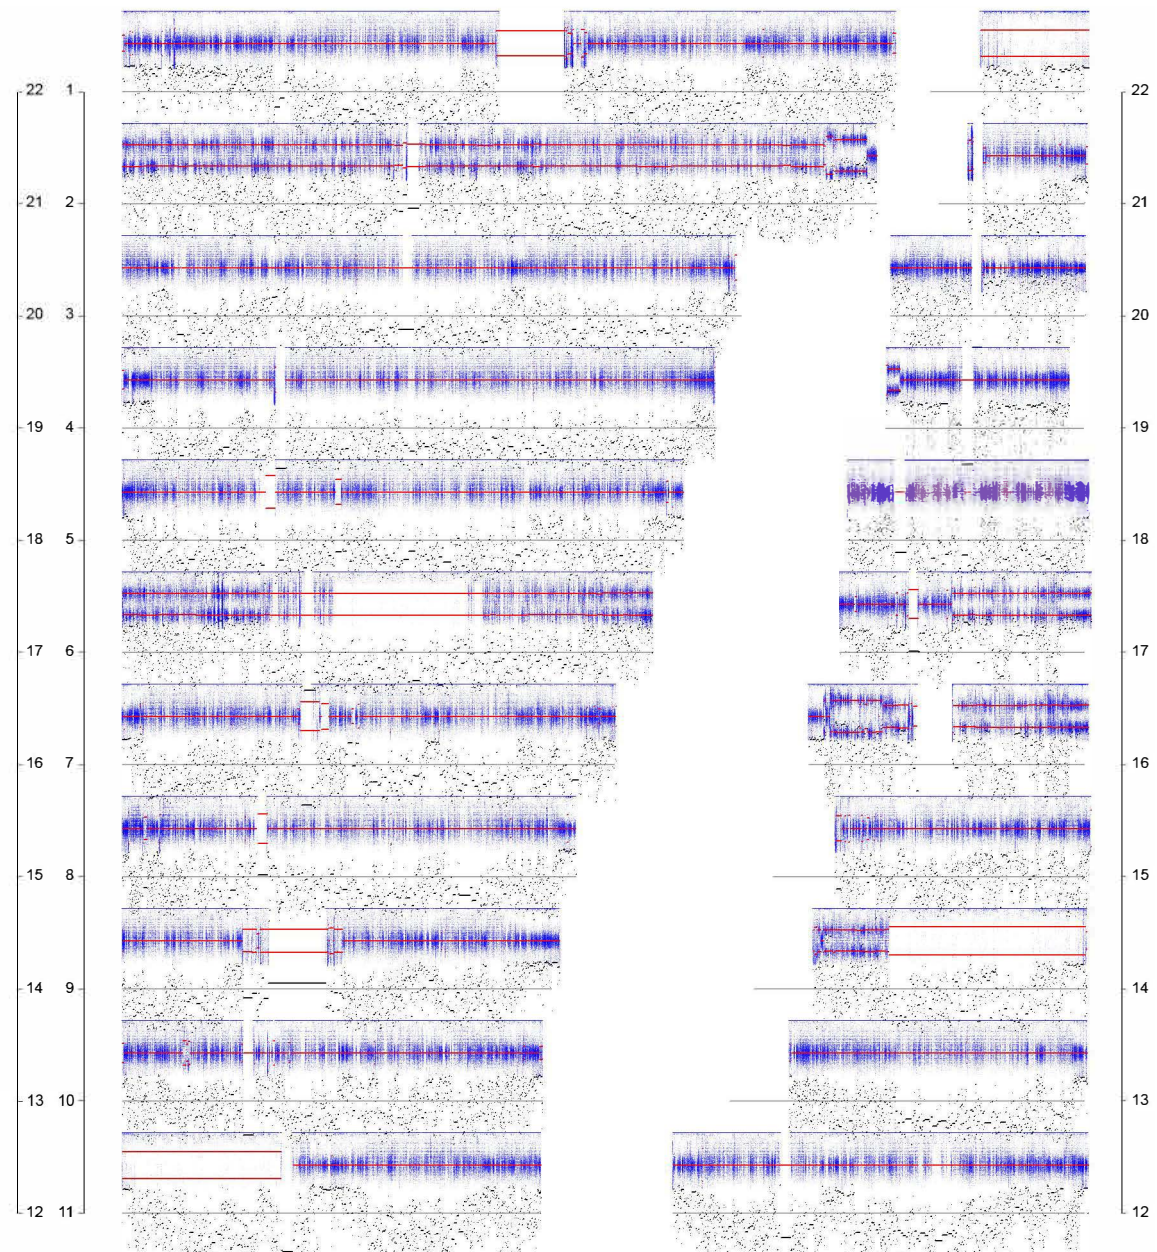



Supplemental Fig. S18: Structural variants detected in cisplatin treated cell line clones. Cell line clones are plotted in separate levels above the chromosomes (in grey). Guide-lines are shown indicating samples 1, 4 and 7 (thin black lines). All interchromosomal translocations were balanced translocations, the details of which are listed in the table below.

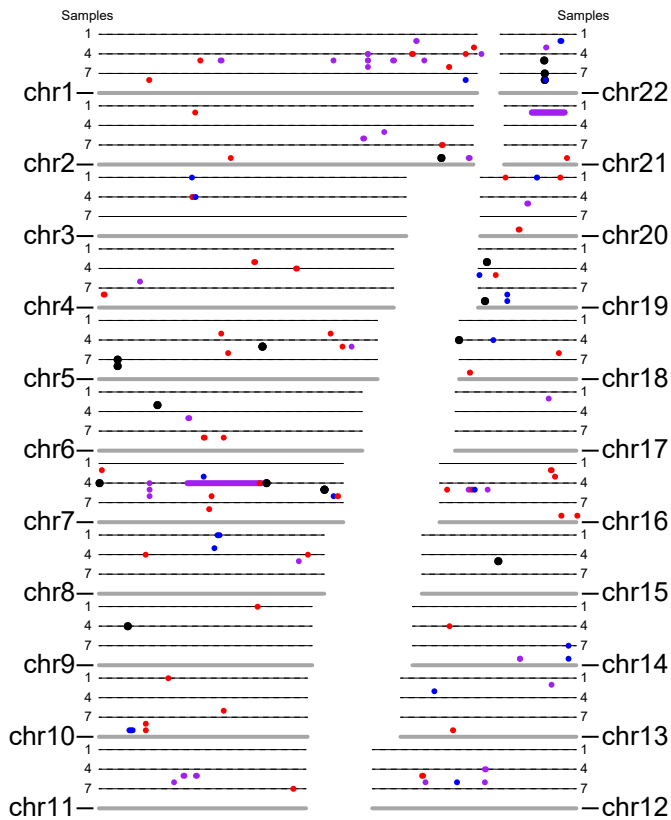

**Samples:**

1: MCF-10A\_Cis\_1 4: MCF-10A\_Cis\_4 7: HepG2\_Cis\_1  
 2: MCF-10A\_Cis\_2 5: MCF-10A\_Cis\_5 8: HepG2\_Cis\_3  
 3: MCF-10A\_Cis\_3 6: MCF-10A\_Cis\_6 9: HepG2\_Cis\_4  
 No structural variants were detected in HepG2\_Cis\_2

**Events:**

— Duplication  
 — Deletion  
 — Inversion  
 — Interchromosomal translocation breakpoint

**Balanced translocations:**

| Sample_ID    | Chrom_start | POS_Start | Chrom_End | POS_End   |
|--------------|-------------|-----------|-----------|-----------|
| MCF10A_Cis_3 | 6           | 38009460  | 19        | 5796141   |
| MCF10A_Cis_3 | 19          | 5796141   | 6         | 38009460  |
| MCF10A_Cis_4 | 7           | 430688    | 9         | 18747165  |
| MCF10A_Cis_4 | 7           | 108813393 | 18        | 11150     |
| MCF10A_Cis_4 | 9           | 18747165  | 7         | 430688    |
| MCF10A_Cis_4 | 18          | 11150     | 7         | 108813393 |
| MCF10A_Cis_5 | 5           | 106162330 | 7         | 146375568 |
| MCF10A_Cis_5 | 5           | 106162582 | 7         | 146375620 |
| MCF10A_Cis_5 | 7           | 146375570 | 5         | 106162328 |
| MCF10A_Cis_5 | 7           | 146375622 | 5         | 106162580 |
| MCF10A_Cis_5 | 15          | 49695419  | 22        | 28720903  |
| MCF10A_Cis_5 | 22          | 28720908  | 15        | 49695414  |
| HepG2_Cis_1  | 5           | 12159881  | 22        | 29065383  |
| HepG2_Cis_1  | 22          | 29065382  | 5         | 12159882  |
| HepG2_Cis_3  | 5           | 12159881  | 22        | 29065383  |
| HepG2_Cis_3  | 22          | 29065382  | 5         | 12159882  |
| HepG2_Cis_4  | 2           | 222260650 | 19        | 4551288   |
| HepG2_Cis_4  | 19          | 4551288   | 2         | 222260650 |

Supplemental Fig. S19: Comparison of signature W6 with experimental cisplatin signature

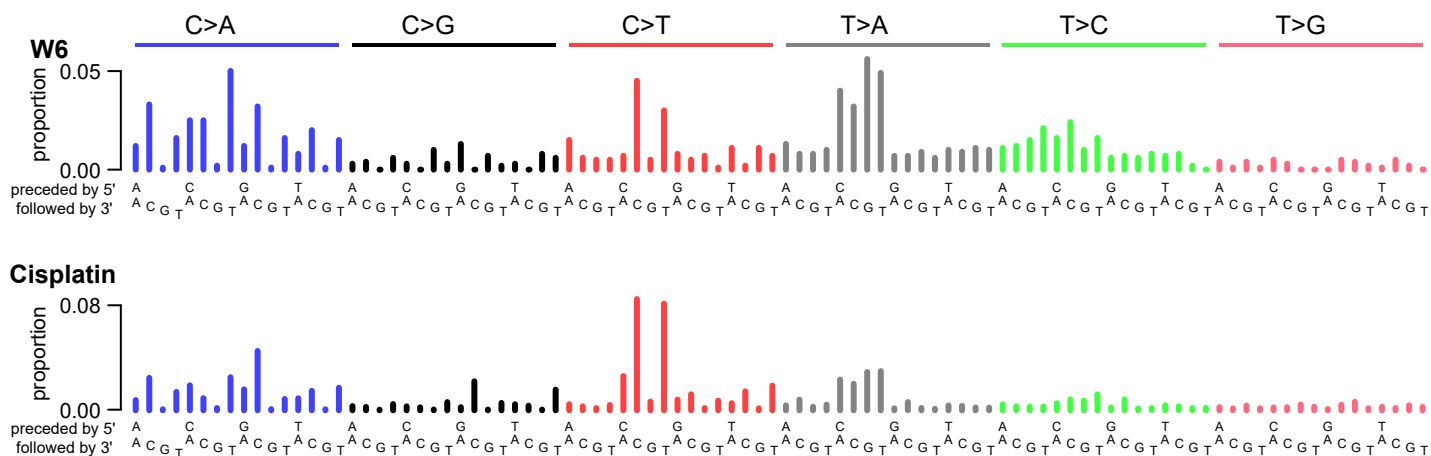

### Cosine similarities between W6 and cisplatin

| Mutation class | Cosine similarity |
|----------------|-------------------|
| Overall        | 0.781             |
| C>A            | 0.915             |
| C>G            | 0.357             |
| C>T            | 0.917             |
| T>A            | 0.981             |
| T>C            | 0.850             |
| T>G            | 0.767             |

Supplemental Fig. S20: SNS spectrum of HCCs positive for cisplatin in the SNS analysis

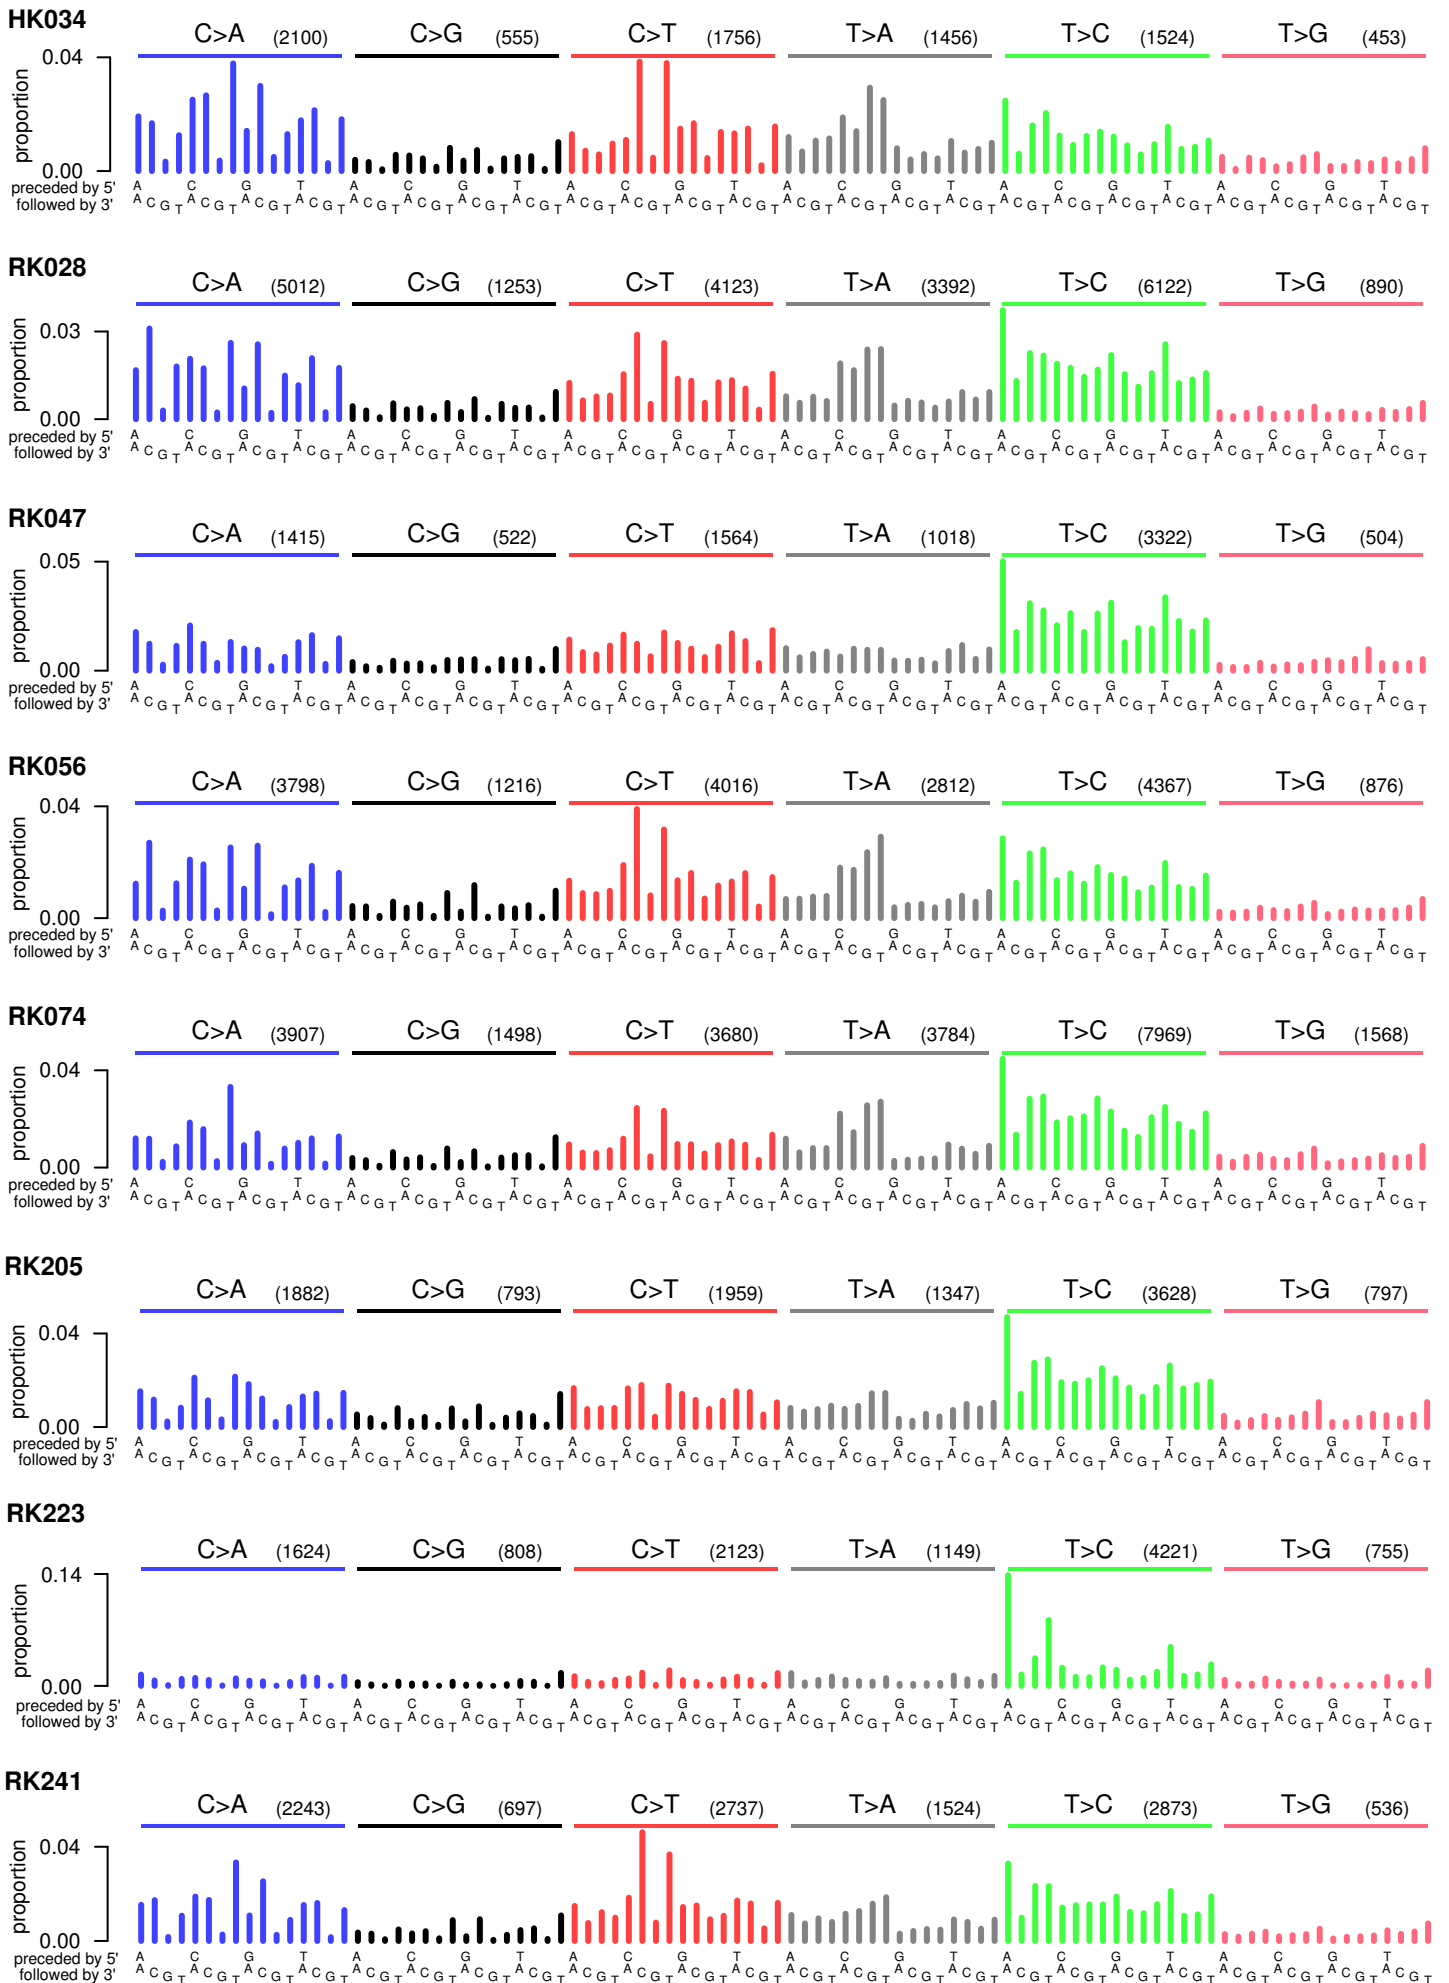



Supplemental Fig. S21: Dinucleotide substitution spectra of HCCs positive for cisplatin in the SNS analysis

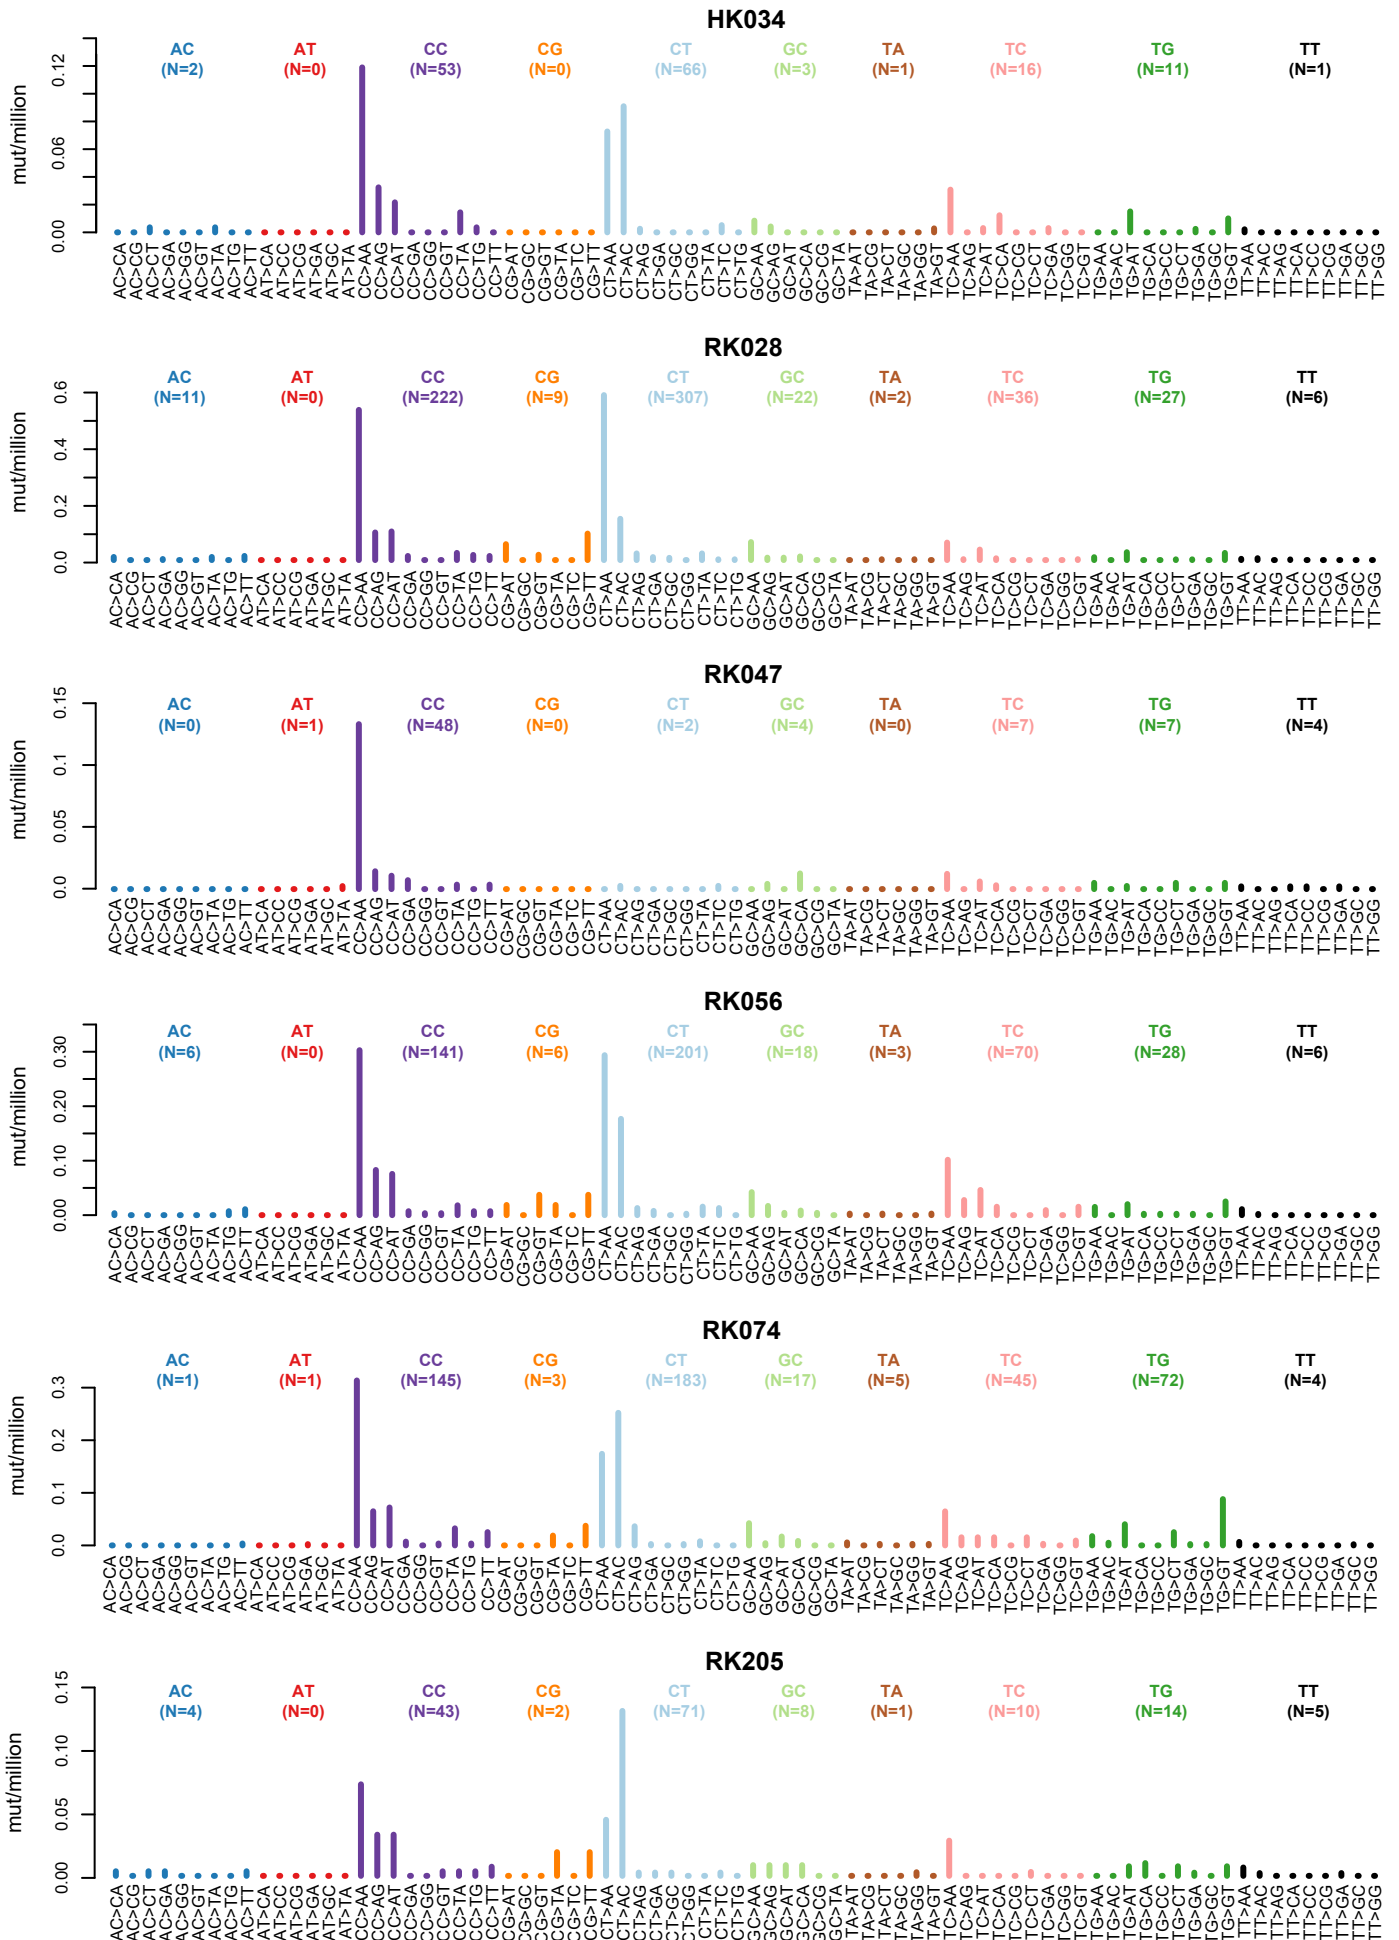

### RK223

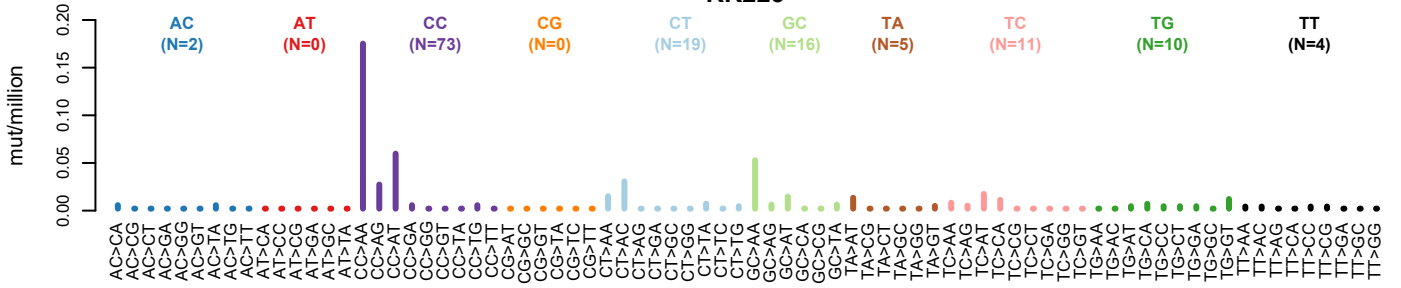

### RK241

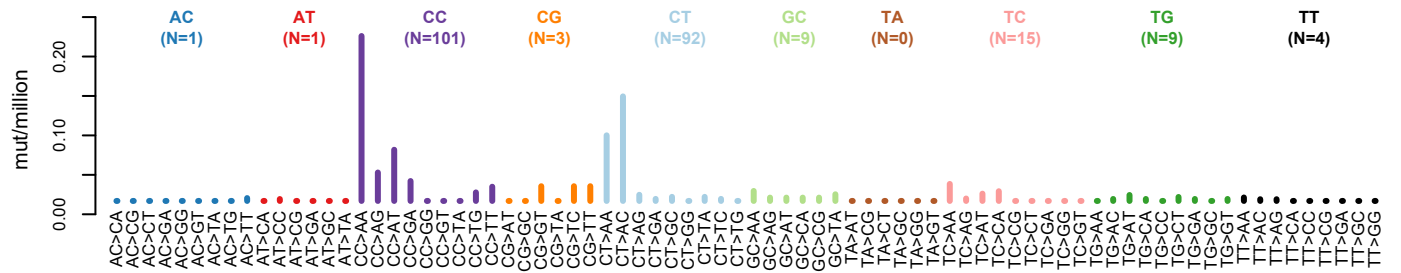

### RK256

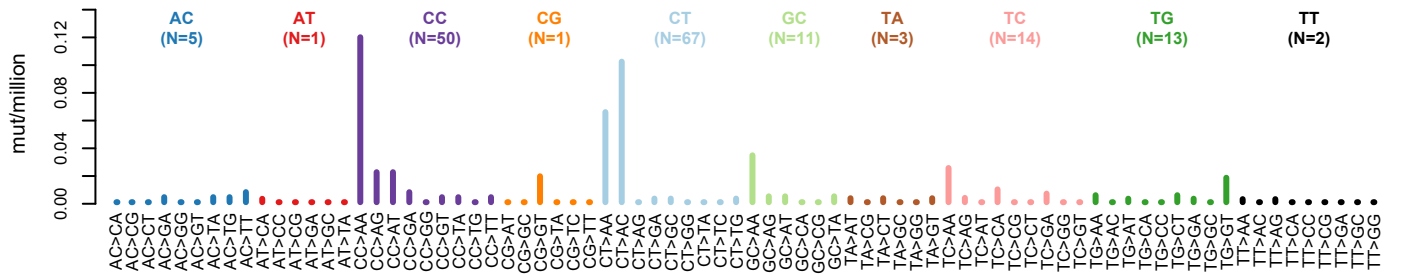

### RK309

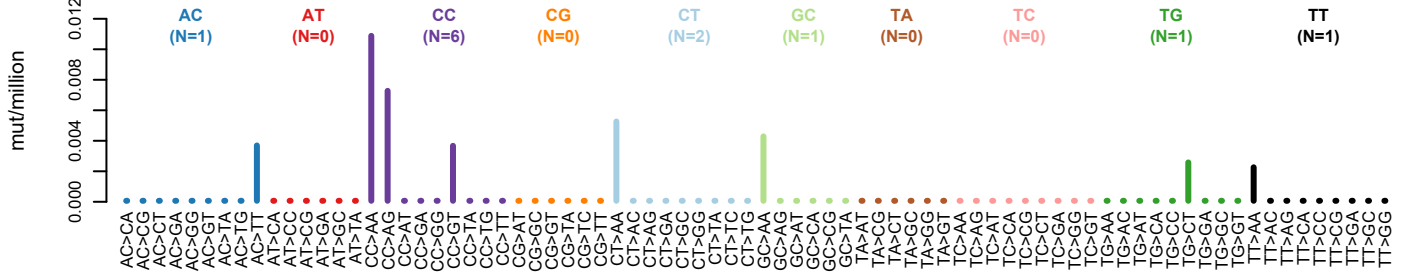

Supplemental Fig. S22: Clustering of patients according to the percentage of SNSs involved in DNSs and the cosine similarity of their DNS spectrum with that of the experimental cisplatin DNS signature. Samples that were identified to be positive for the cisplatin mutational signature in the mSigAct SNS analysis are displayed in red. A: HCCs, B: ESADs. For the ESADs, samples with known prior exposure to platinum-based chemotherapeutics are shown as circles; samples without prior platinum-based treatment are shown as crosses.

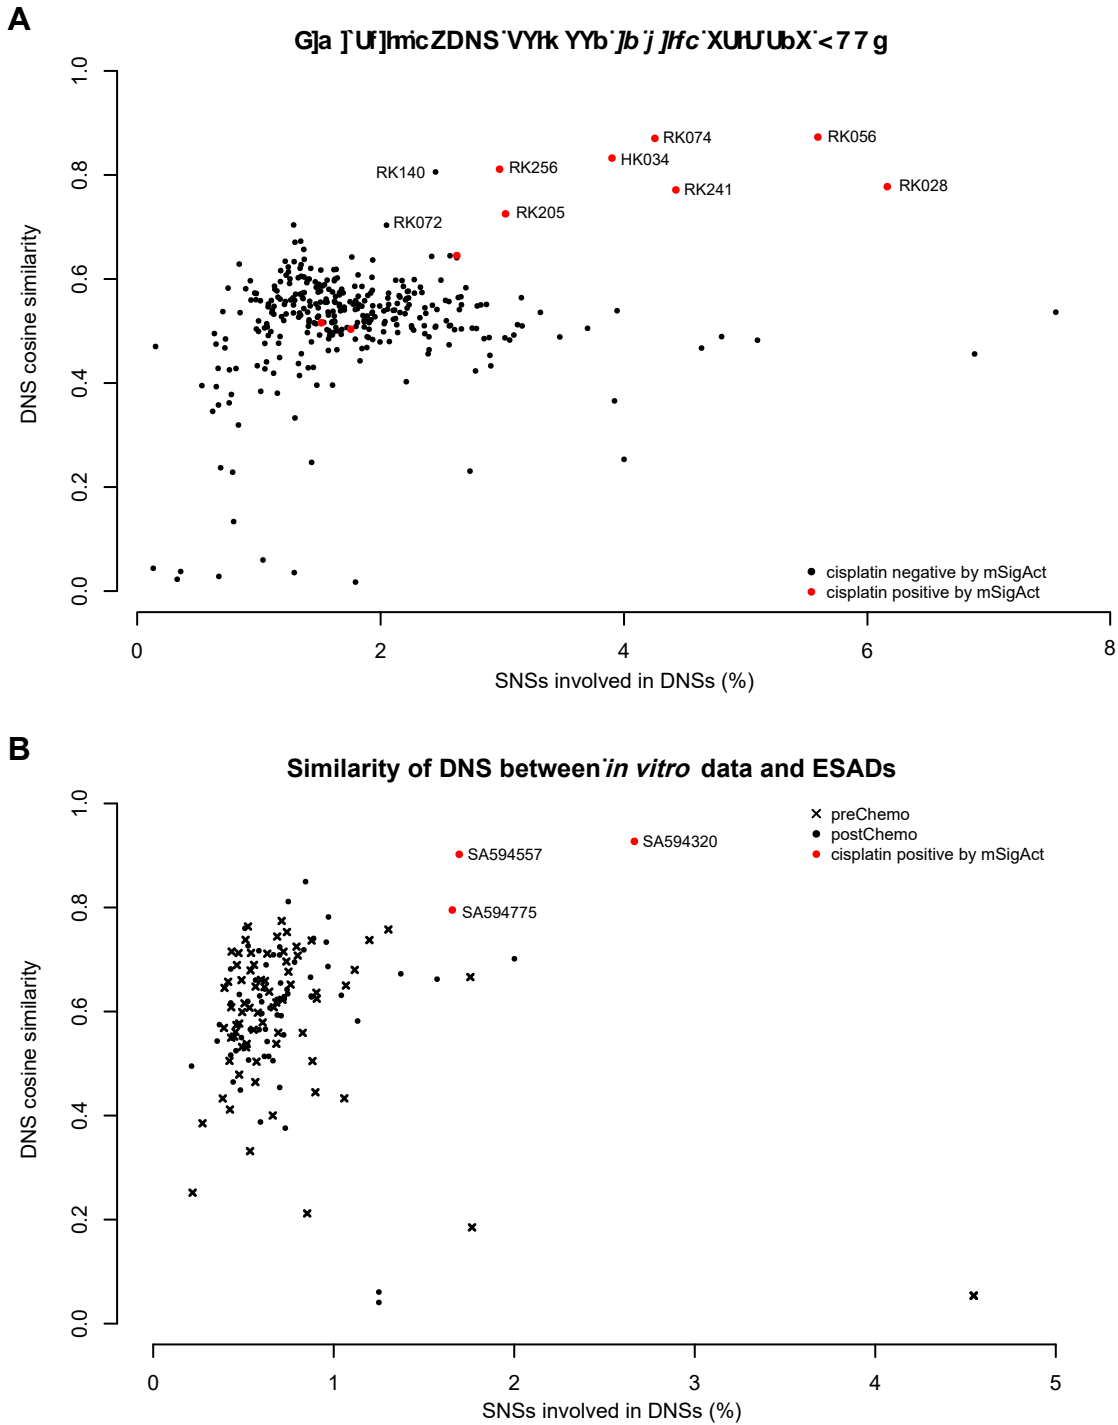

Supplemental Fig. S23: SNS spectrum of esophageal adenocarcinomas positive for cisplatin in the SNS analysis.

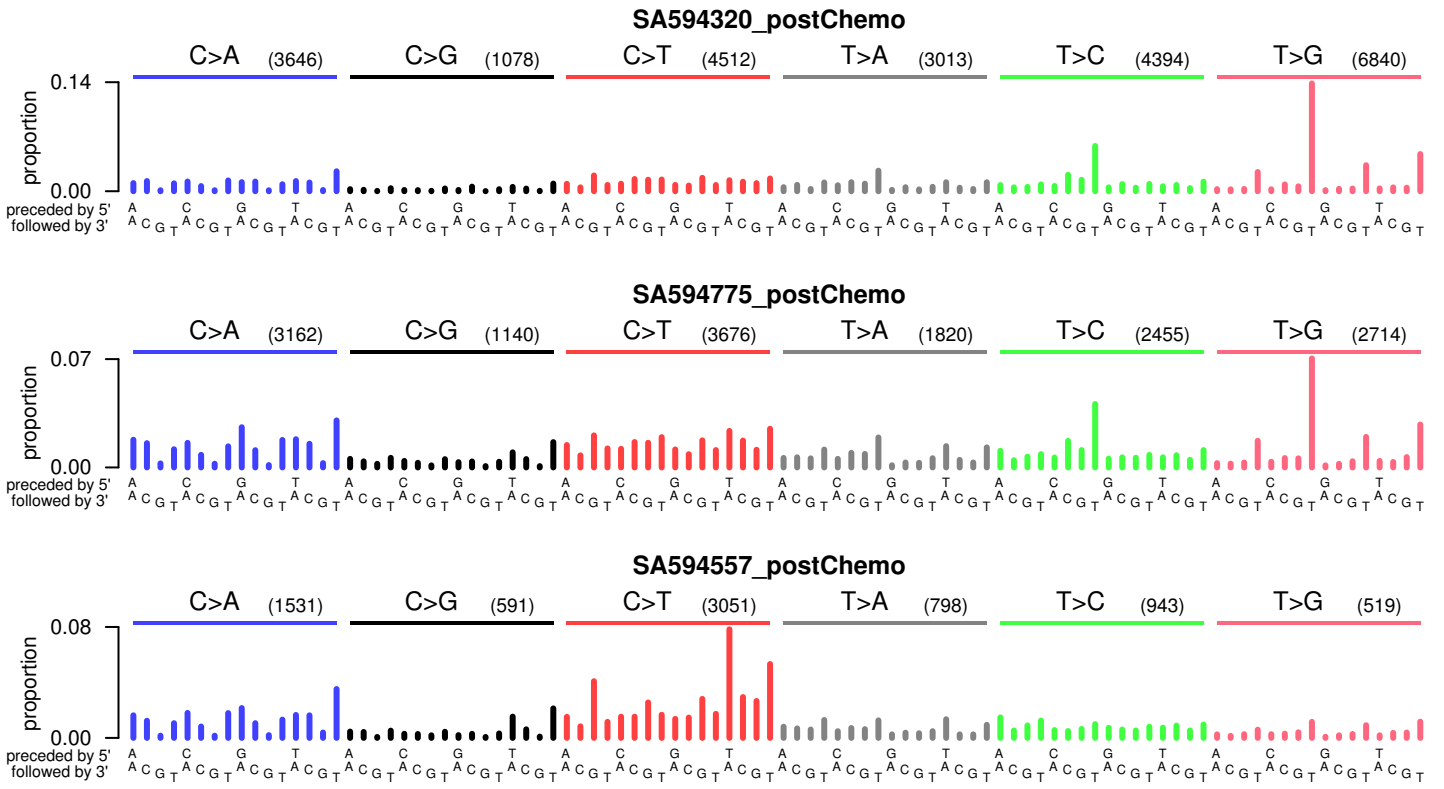



Supplemental Fig. S24: Dinucleotide substitution spectra of esophageal adenocarcinomas positive for cisplatin in the SNS analysis.

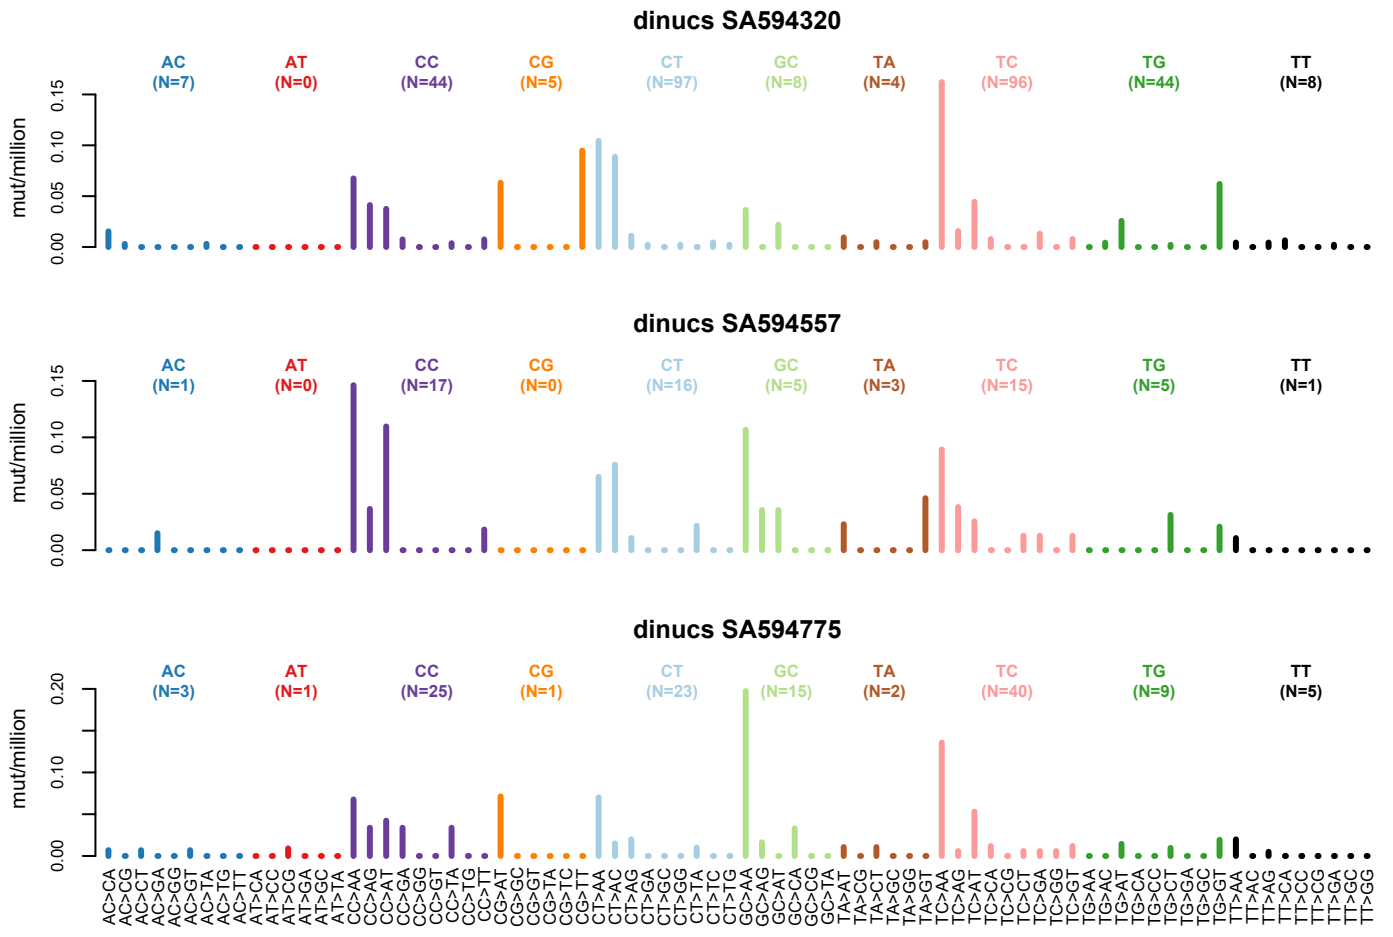



B: DNS signature exposures in HCCs

DNS exposures HCCs

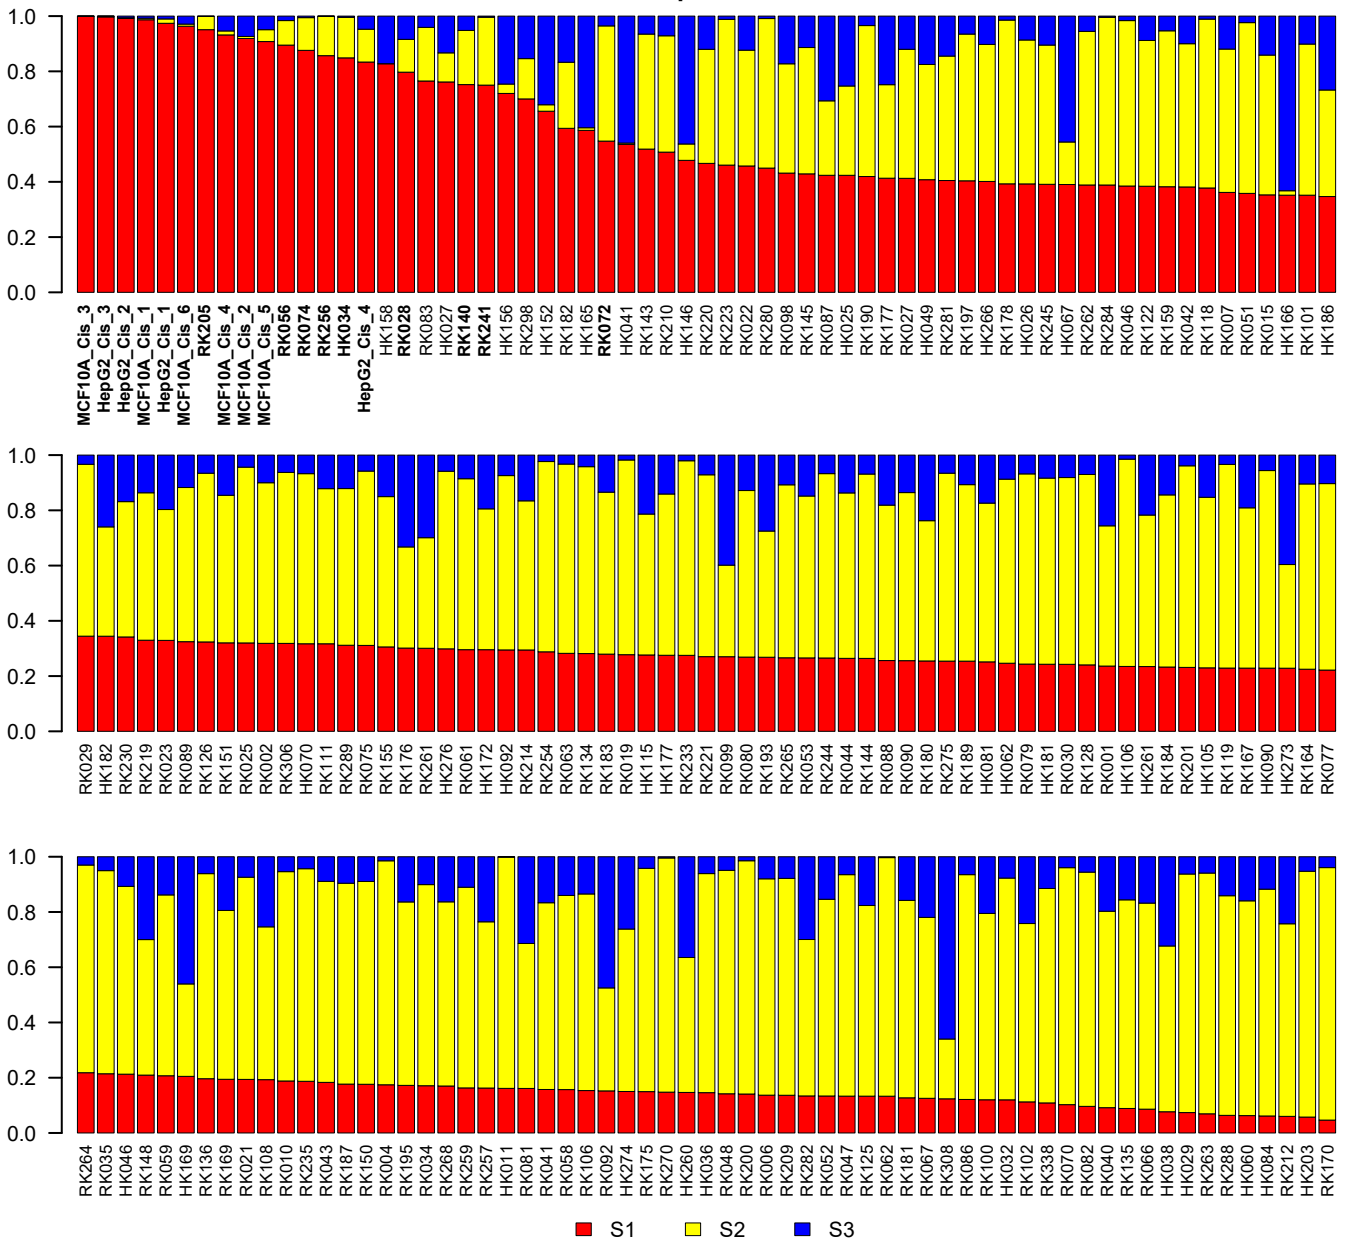

Supplemental Fig. S26: ssNMF result on DNS spectra of all ESADs with at least 25

DNSs. A: DNS signatures extracted by NMF

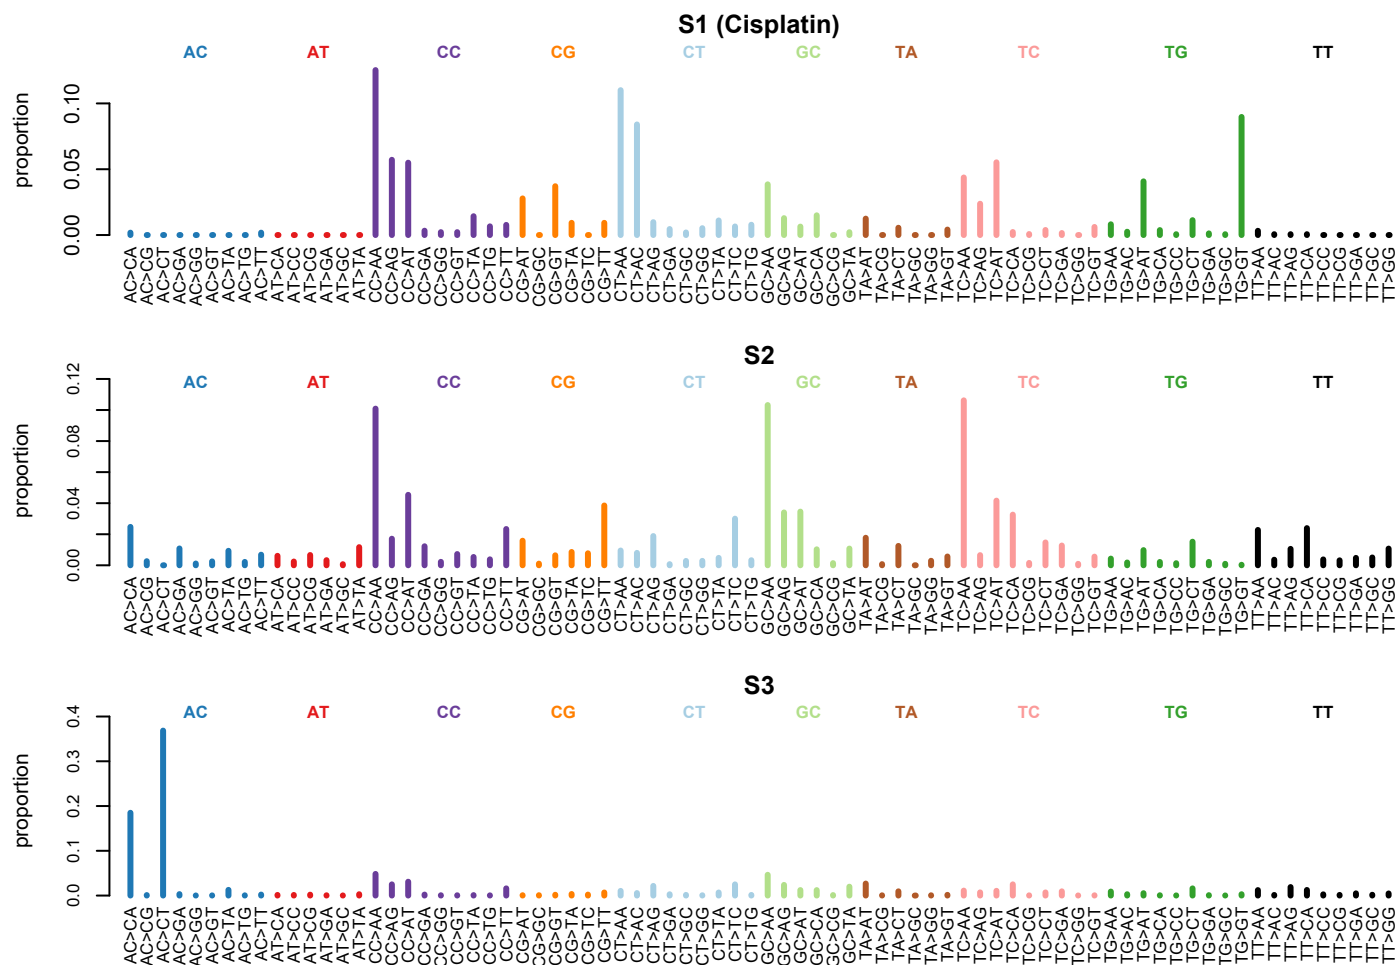

B: DNS signature exposures in ESADs

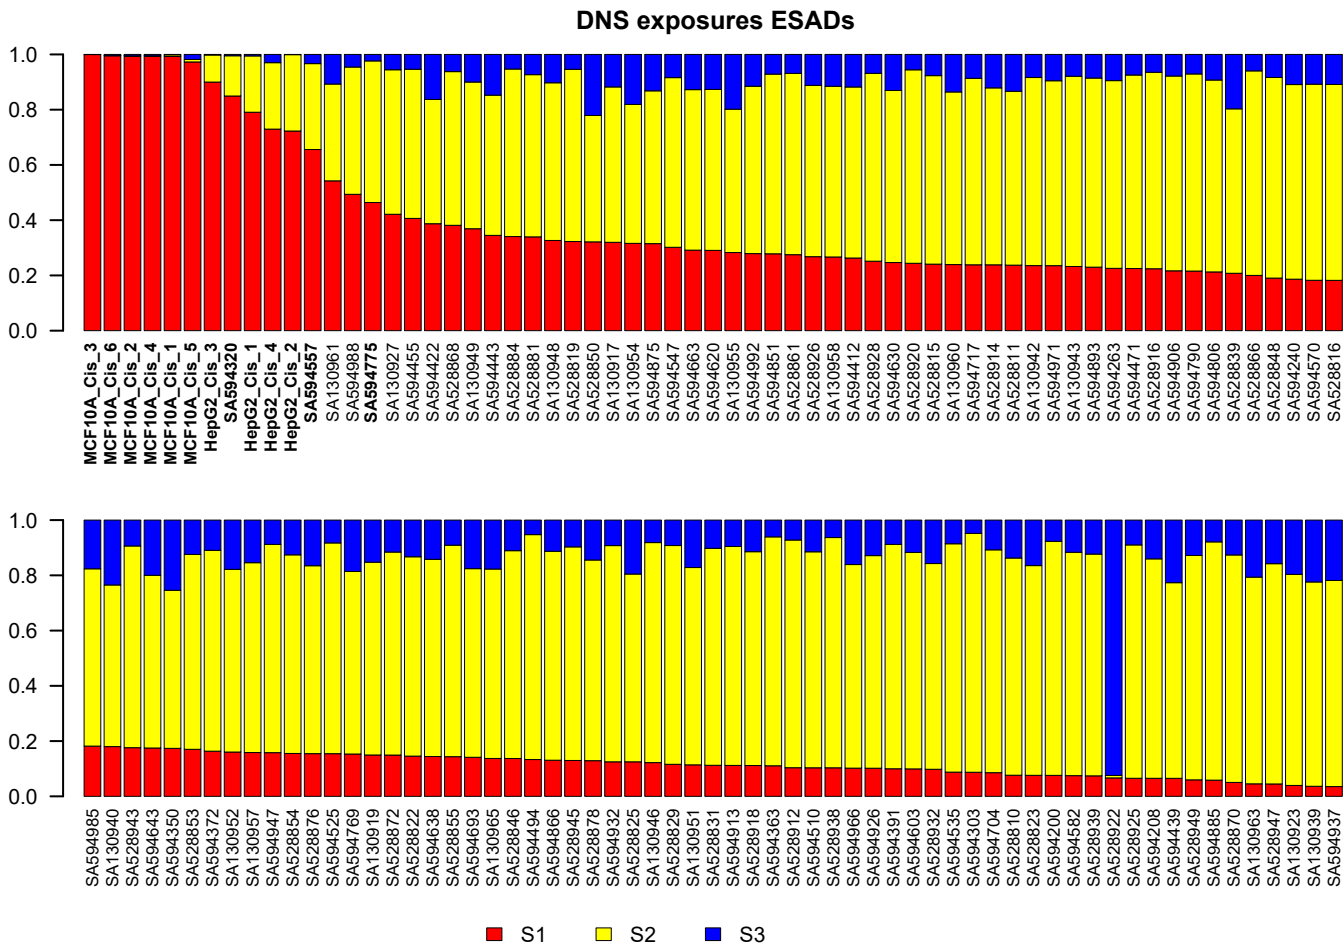

Supplemental Fig. S27: DNS transcription strand bias for tumors positive for cisplatin mutagenesis. The total number of DNSs eligible for transcription strand bias analysis is displayed in parentheses.

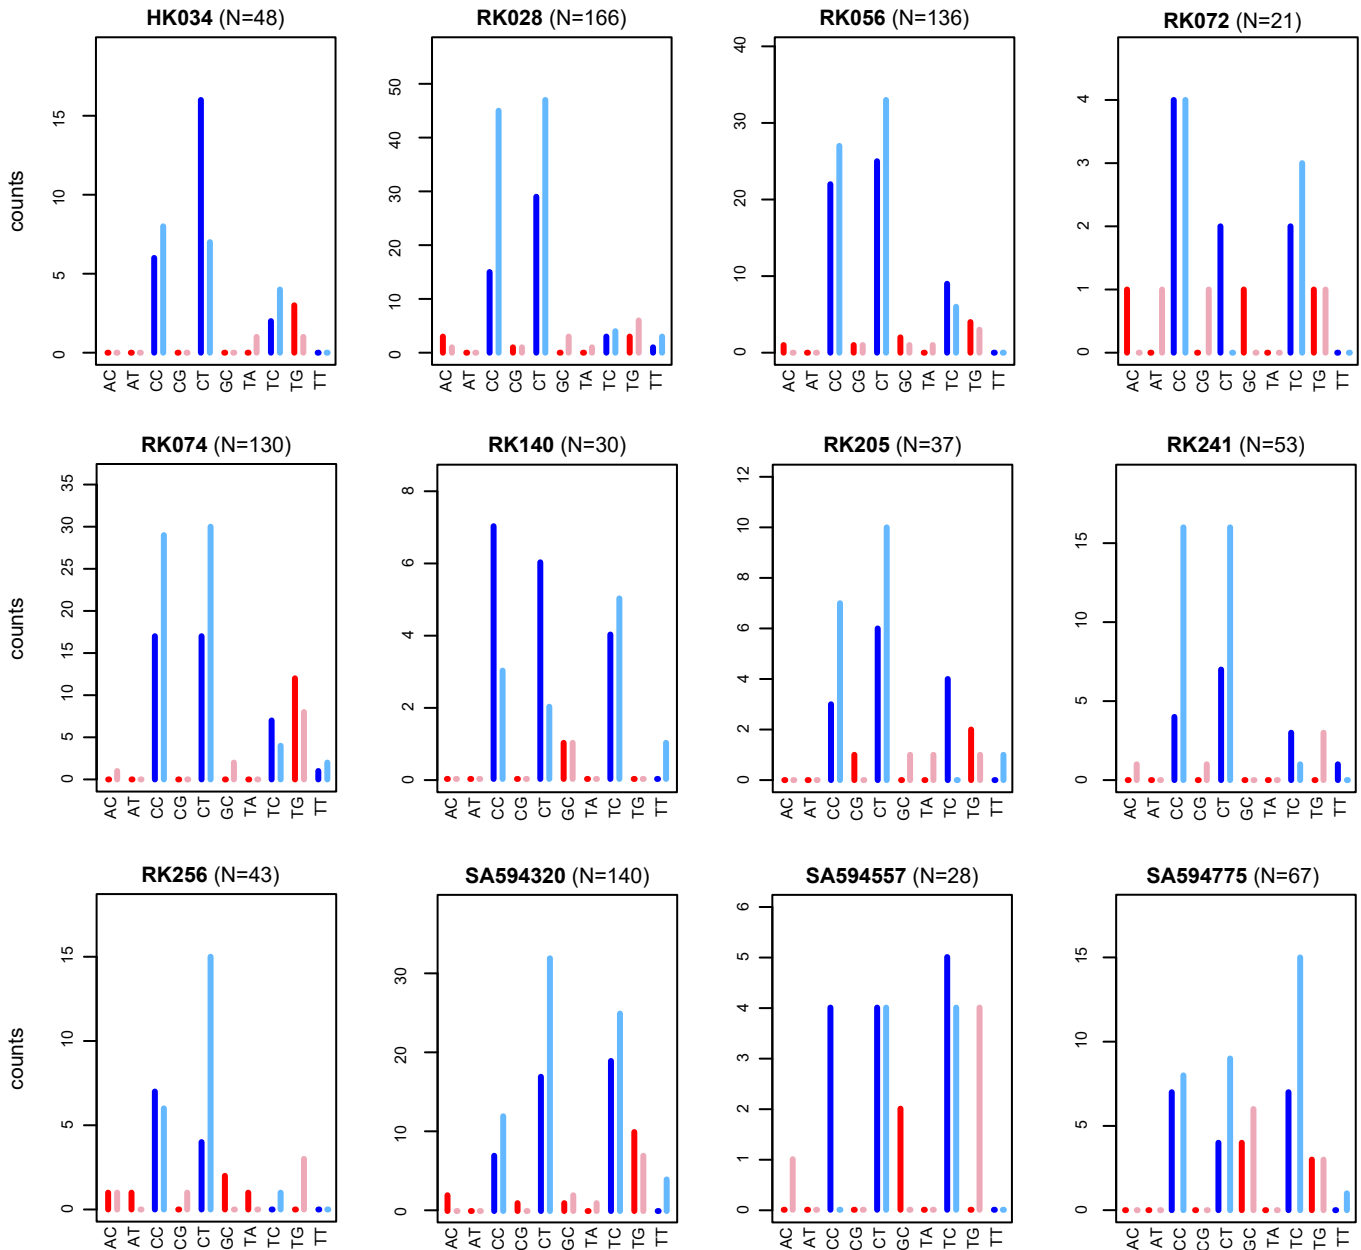

**Transcriptional strand bias of dinucleotides in HCCs and ESADs\***

| Sample   | Intrastrand | Interstrand |
|----------|-------------|-------------|
| HK034    | NS          | NS          |
| RK056    | 2.1E-01     | NS          |
| RK072    | NS          | NS          |
| RK074    | 1.6E-02     | NS          |
| RK140    | NS          | NS          |
| RK205    | NS          | NS          |
| RK241    | 6.6E-03     | NS          |
| RK256    | 4.0E-02     | NS          |
| RK028    | 1.6E-05     | NS          |
| SA594320 | 3.4E-03     | NS          |
| SA594557 | NS          | NS          |
| SA594775 | 2.4E-02     | NS          |

\*: NS = not significant

Blue = Intrastrand  
Red = Interstrand  
Light = sense  
Dark = antisense

Supplemental Fig. S28: Comparison of cisplatin SNS (A) and DNS (B) mutational signature with previously published cisplatin signatures. *C. elegans* (all worms combined) is the combined mutation spectrum of all mutations of worms treated with cisplatin, regardless of DNA repair deficiency (total 681 SNSs and 53 DNSs). *C. elegans* (N2-worms only) is the mutation spectrum of the mutations of N2 (DNA repair proficient) worms treated with cisplatin (total 51 SNSs, there is no DNS plot, as there was only a single TC>CA DNS). *G. gallus* (DT40) is the mutation spectrum of the 3 DT40 clones sequenced (total 2,436 SNSs and 183 DNSs). *H. sapiens* (MCF-10A and HepG2) is the consensus mutation spectrum of all MCF-10A and HepG2 clones combined (70,313 SNSs and 2,839 DNSs).

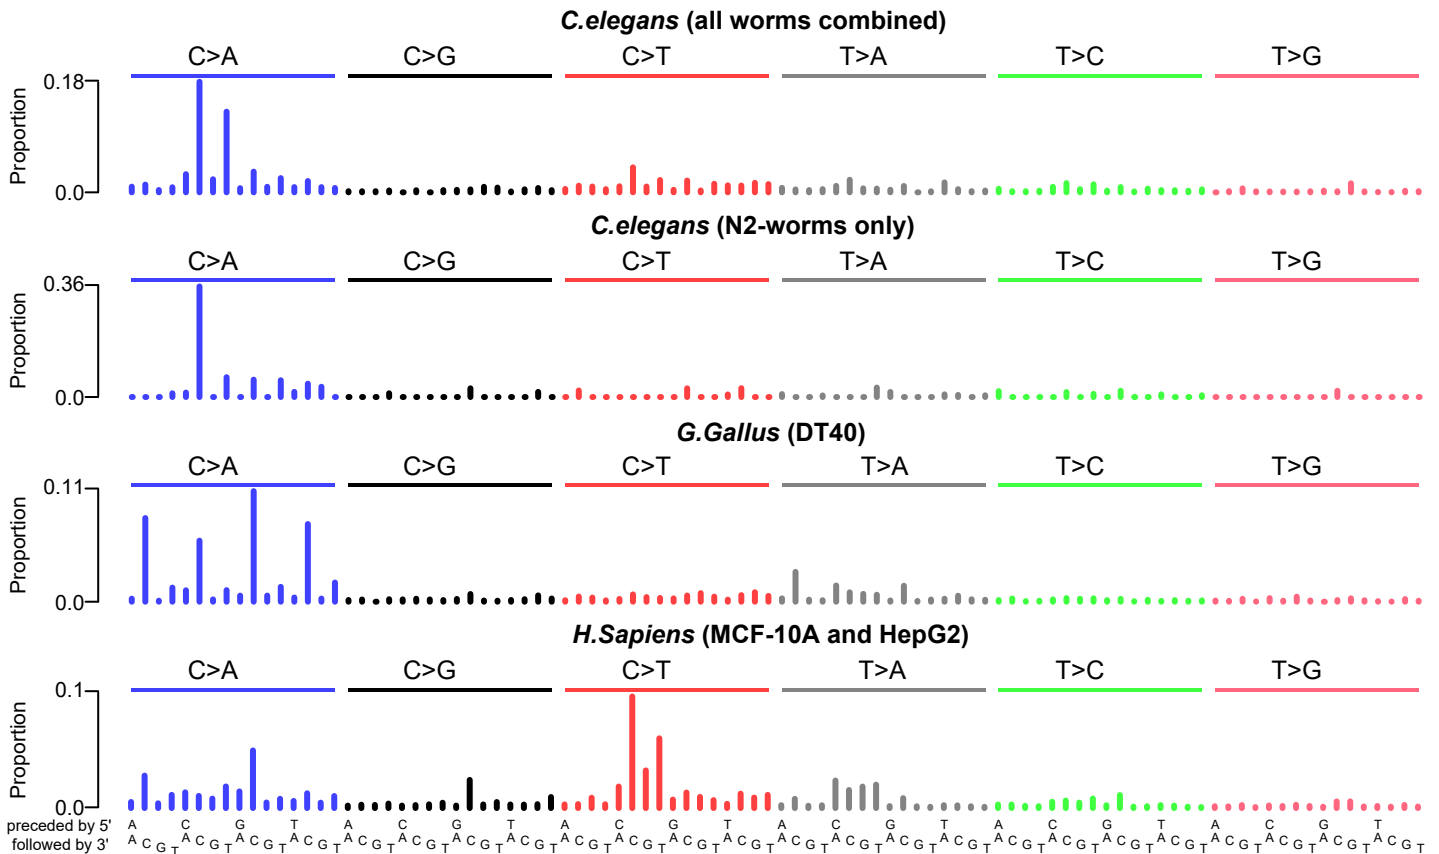

B: DNS cisplatin signature comparison

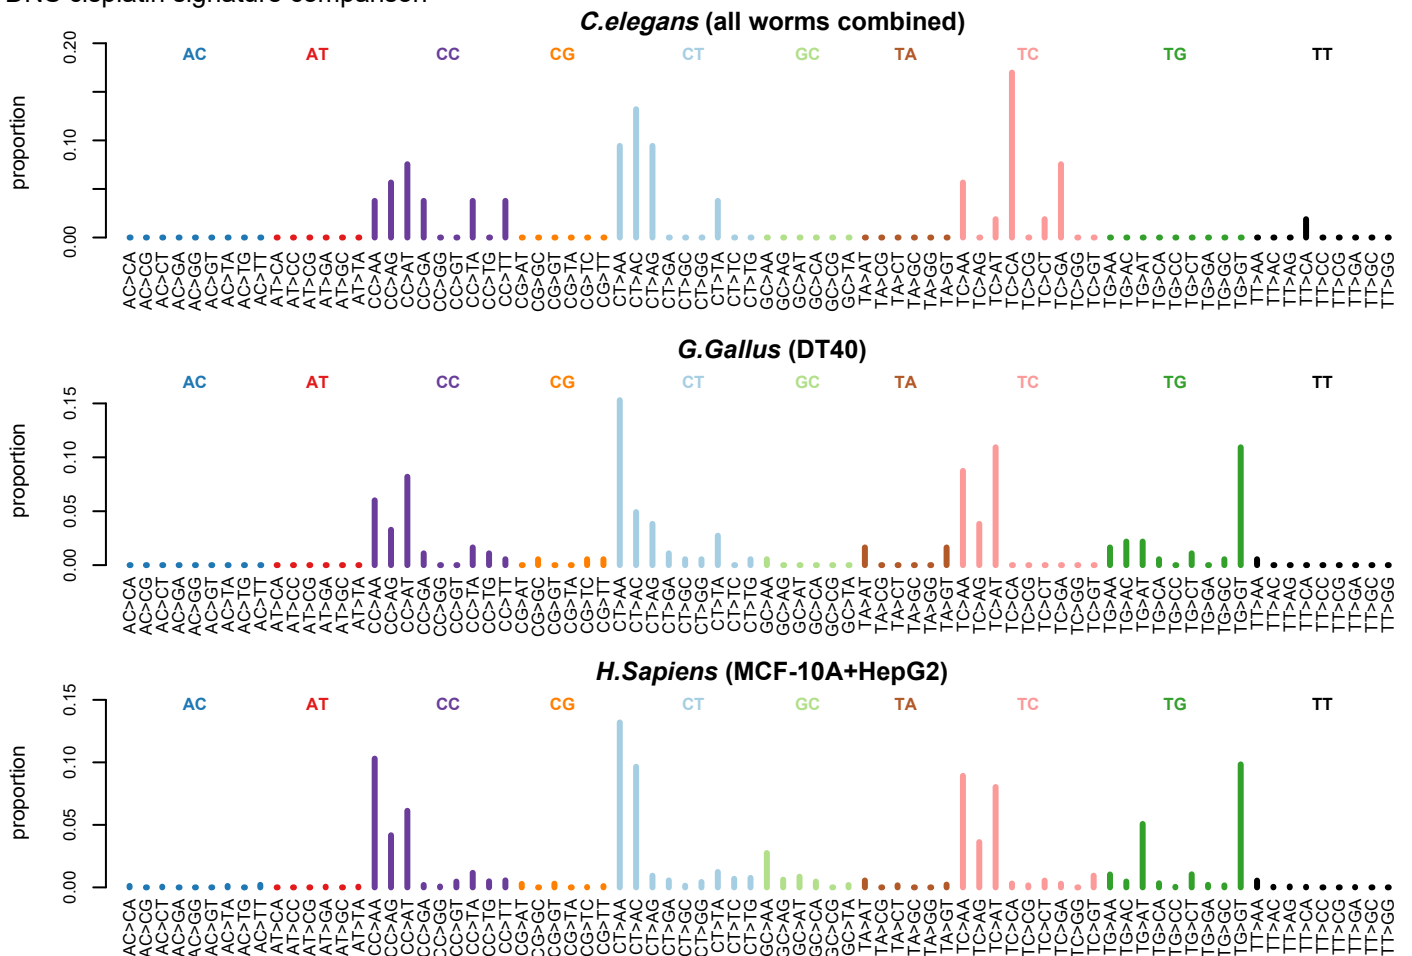





Supplemental Fig. S30: Bias of translesion synthesis towards misincorporation across the 5' or 3' adducted-base in the 4 types of intrastrand adducts induced by cisplatin. (note the log scale of the Y-axis)

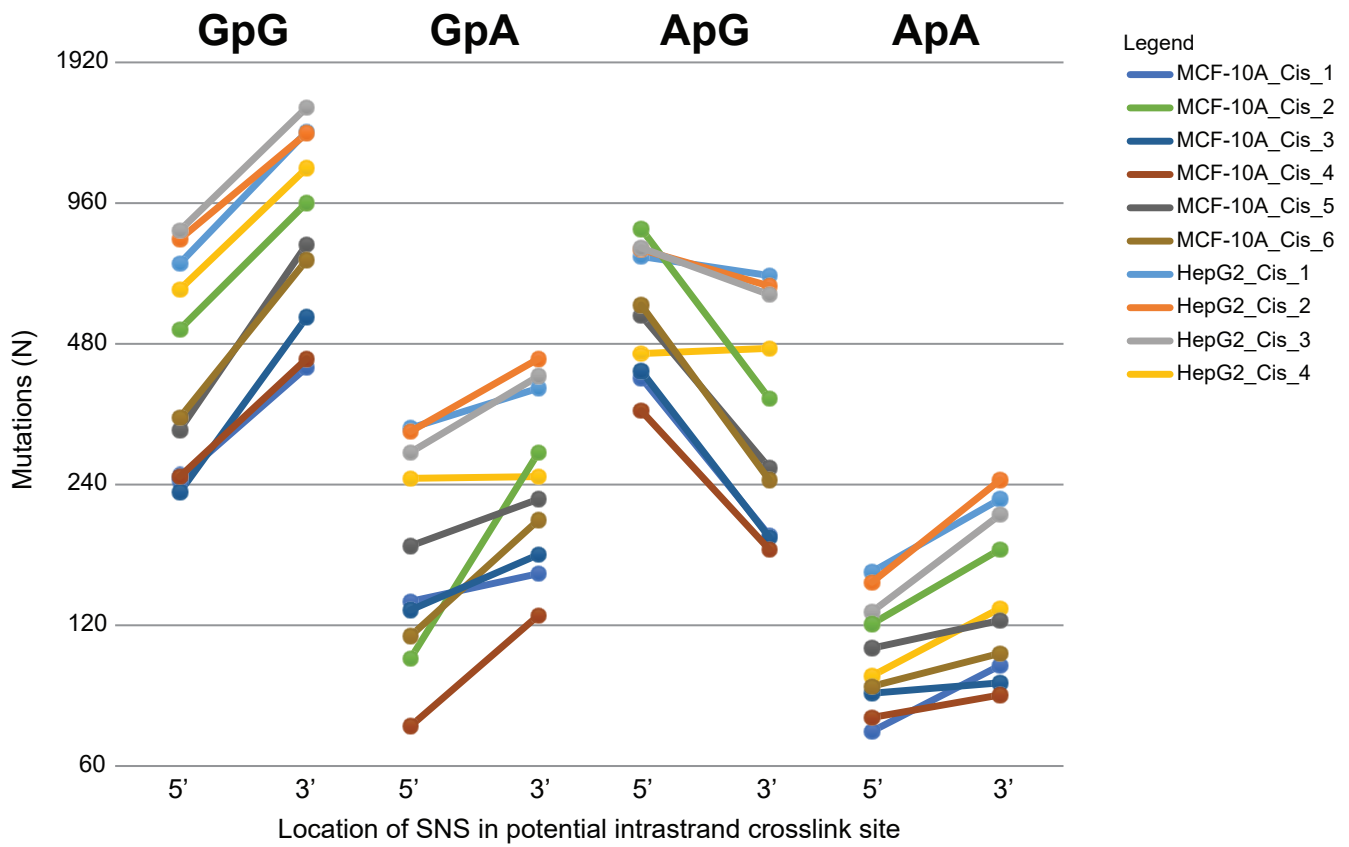

Supplemental Fig. S31: MCF-10A proliferation rate during cisplatin exposure

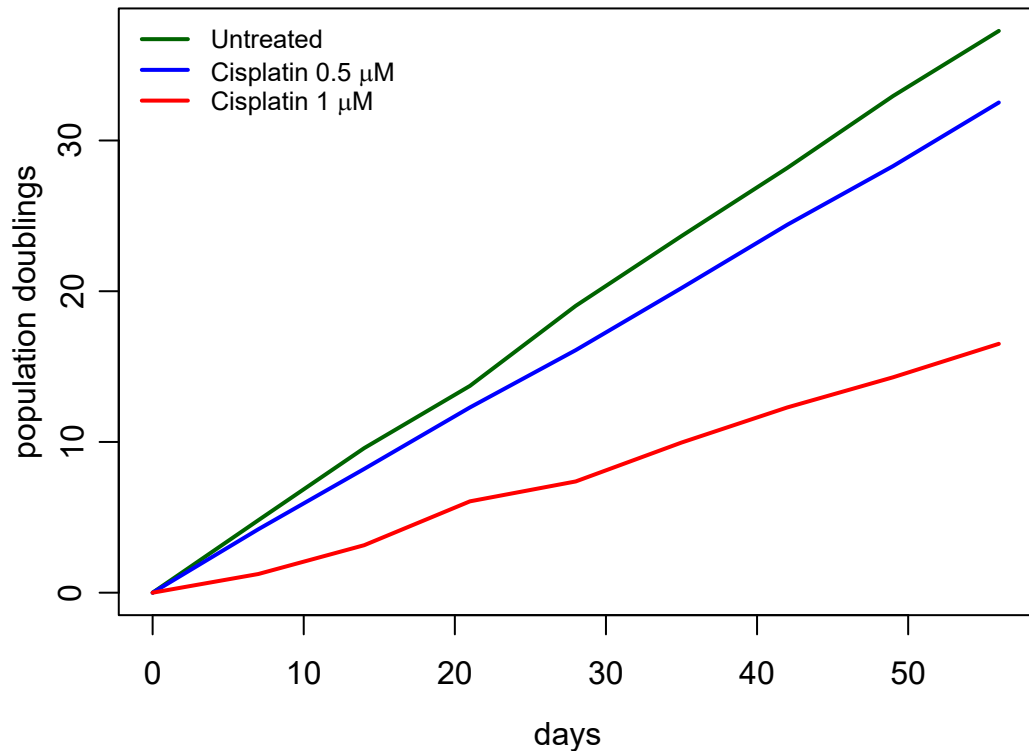

Supplemental Fig. S32: Variant allele frequency distribution of the cisplatin mutations. The tail towards the lower end of the histogram represents variants inside regions of the MCF-10A genome displaying aneuploidy.

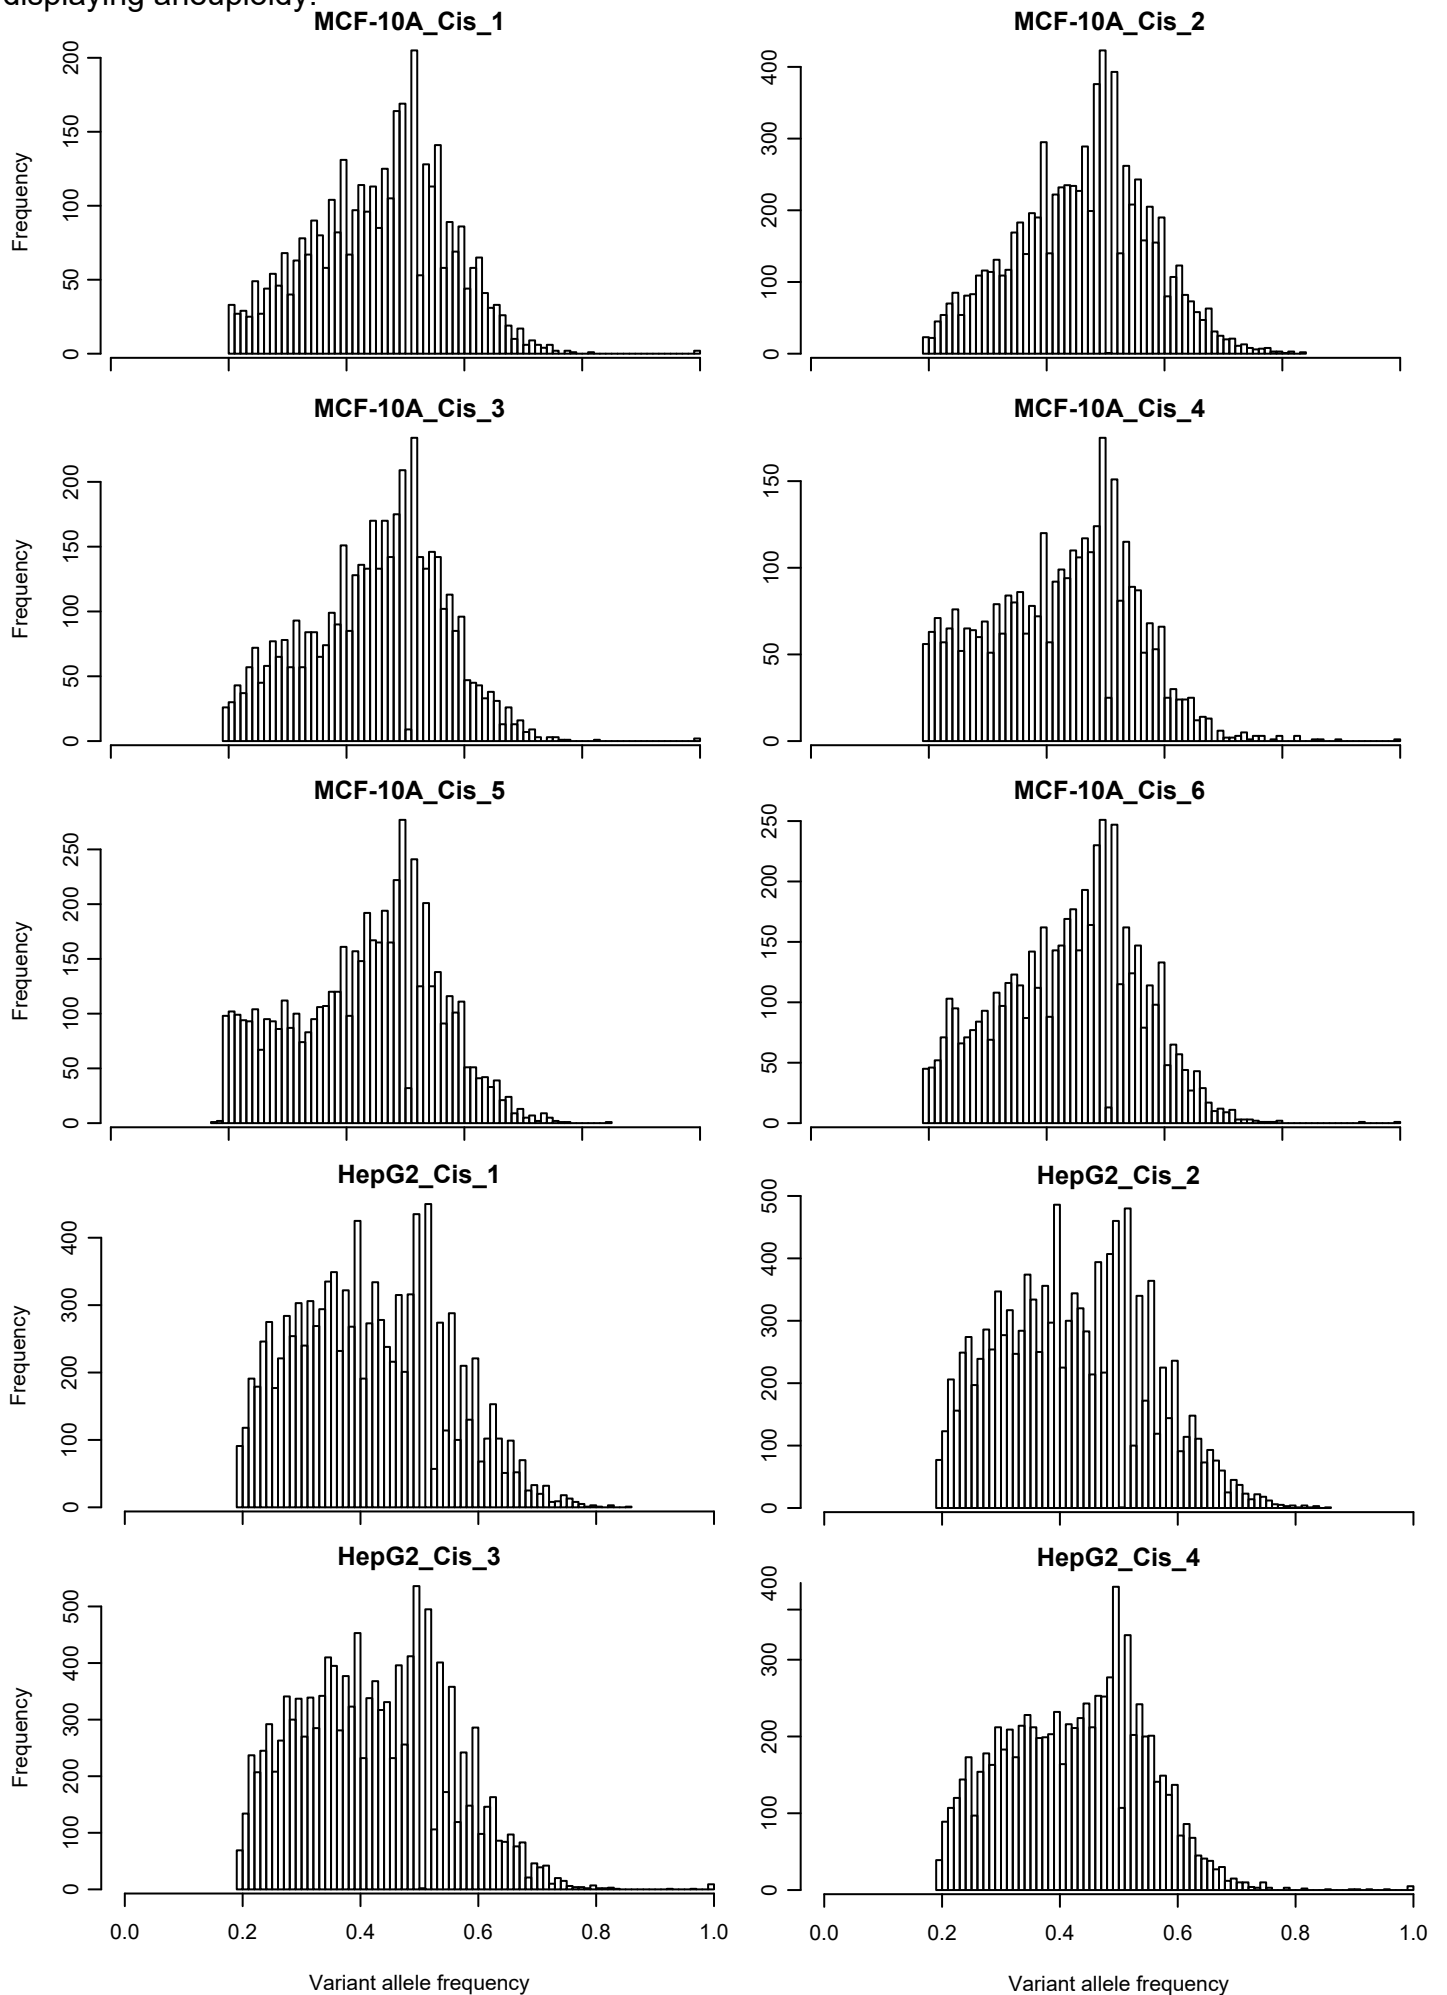

**Supplemental Table S1: Sequencing statistics and substitutions in cisplatin treated cell line clones**

| Sample_ID                       | MCF10A     |            |            |            |            |            |            | HepG2      |            |            |            |            |
|---------------------------------|------------|------------|------------|------------|------------|------------|------------|------------|------------|------------|------------|------------|
|                                 | Parental   | 1          | 2          | 3          | 4          | 5          | 6          | Parental   | 1          | 2          | 3          | 4          |
| Cisplatin concentration         | --         | 0.5µM      | 1µM        | 0.5µM      | 0.5µM      | 1µM        | 1µM        | --         | 0.75µM     | 0.75µM     | 0.75µM     | 0.75µM     |
| Exposure time (weeks)           | --         | 4          | 4          | 8          | 8          | 8          | 8          | --         | 8          | 8          | 8          | 8          |
| <b>Sequencing statistics</b>    |            |            |            |            |            |            |            |            |            |            |            |            |
| Reads mapped (%)                | 99.65      | 99.67      | 99.67      | 99.84      | 99.61      | 99.63      | 99.74      | 99.47      | 99.89      | 99.88      | 99.89      | 99.92      |
| Mean mapping quality            | 50.73      | 50.73      | 50.81      | 50.69      | 49.19      | 49.50      | 50.10      | 50.86      | 50.03      | 49.86      | 50.51      | 50.65      |
| mean coverage                   | 35.06      | 34.16      | 35.69      | 36.31      | 41.3       | 40.70      | 33.13      | 40.98      | 35.96      | 37.62      | 34.55      | 34.60      |
| <b>Substitutions</b>            |            |            |            |            |            |            |            |            |            |            |            |            |
| Single nucleotide substitutions | --         | 3655       | 7712       | 4460       | 3544       | 5522       | 5260       | --         | 10263      | 10515      | 11202      | 8180       |
| Dinucleotide substitutions      | --         | 136        | 328        | 149        | 123        | 171        | 199        | --         | 434        | 484        | 505        | 310        |
| Trinucleotide substitutions     | --         | 2          | 10         | 2          | 2          | 6          | 6          | --         | 8          | 10         | 6          | 1          |
| Deletions                       | --         | 152        | 309        | 145        | 213        | 266        | 283        | --         | 340        | 350        | 371        | 200        |
| Insertions                      | --         | 54         | 142        | 78         | 89         | 141        | 136        | --         | 237        | 267        | 280        | 155        |
| <b>Substitutions</b>            |            |            |            |            |            |            |            |            |            |            |            |            |
| Mutation density (mut/mb)       | --         | 1.26       | 2.66       | 1.54       | 1.22       | 1.91       | 1.82       | --         | 3.54       | 3.63       | 3.87       | 2.82       |
| SNSs in DNSs                    | --         | 7.4%       | 8.5%       | 6.7%       | 6.9%       | 6.2%       | 7.6%       | --         | 8.5%       | 9.2%       | 9.0%       | 7.6%       |
| ENA accession                   | ERS1836384 | ERS1836385 | ERS1836386 | ERS1928084 | ERS1928085 | ERS1928086 | ERS1928087 | ERS2004856 | ERS2004855 | ERS2004854 | ERS2004853 | ERS2004852 |

#Supplemental Table S2: Consensus cisplatin SNS signature; weighted average of the 6 MCF 10A clones and the 4 HepG2 clones.

|         |             |
|---------|-------------|
| ACA>AAA | 0.00936678  |
| ACC>AAC | 0.02965292  |
| ACG>AAG | 0.000941593 |
| ACT>AAT | 0.016762243 |
| CCA>CAA | 0.022843424 |
| CCC>CAC | 0.011100618 |
| CCG>CAG | 0.001999424 |
| CCT>CAT | 0.030228879 |
| GCA>GAA | 0.019135663 |
| GCC>GAC | 0.054234893 |
| GCG>GAG | 0.00102869  |
| GCT>GAT | 0.010337297 |
| TCA>TAA | 0.010960297 |
| TCC>TAC | 0.017780008 |
| TCG>TAG | 0.000941647 |
| TCT>TAT | 0.020611633 |
| ACA>AGA | 0.003811876 |
| ACC>AGC | 0.003077642 |
| ACG>AGG | 0.000613865 |
| ACT>AGT | 0.005699248 |
| CCA>CGA | 0.003608814 |
| CCC>CGC | 0.002712672 |
| CCG>CGG | 0.000792245 |
| CCT>CGT | 0.007482123 |
| GCA>GGA | 0.002866315 |
| GCC>GGC | 0.026493711 |
| GCG>GGG | 0.000667852 |
| GCT>GGT | 0.006739952 |
| TCA>TGA | 0.005566101 |
| TCC>TGC | 0.004222515 |
| TCG>TGG | 0.000676115 |
| TCT>TGT | 0.018870884 |
| ACA>ATA | 0.005645534 |
| ACC>ATC | 0.003625505 |
| ACG>ATG | 0.002040361 |
| ACT>ATT | 0.004857312 |
| CCA>CTA | 0.031259149 |
| CCC>CTC | 0.101702502 |
| CCG>CTG | 0.007967736 |
| CCT>CTT | 0.09757019  |
| GCA>GTA | 0.009773178 |
| GCC>GTC | 0.014642504 |
| GCG>GTG | 0.002052975 |
| GCT>GTT | 0.008869208 |
| TCA>TTA | 0.006516012 |

|         |             |
|---------|-------------|
| TCC>TTC | 0.017279439 |
| TCG>TTG | 0.001824739 |
| TCT>TTT | 0.022530916 |
| ATA>AAA | 0.004450587 |
| ATC>AAC | 0.009735718 |
| ATG>AAG | 0.003330778 |
| ATT>AAT | 0.005155571 |
| CTA>CAA | 0.028151266 |
| CTC>CAC | 0.024159493 |
| CTG>CAG | 0.034982991 |
| CTT>CAT | 0.035847387 |
| GTA>GAA | 0.001804298 |
| GTC>GAC | 0.007525187 |
| GTG>GAG | 0.002111257 |
| GTT>GAT | 0.001389473 |
| TTA>TAA | 0.004471737 |
| TTC>TAC | 0.004086108 |
| TTG>TAG | 0.002584201 |
| TTT>TAT | 0.00251771  |
| ATA>ACA | 0.005473727 |
| ATC>ACC | 0.003774145 |
| ATG>ACG | 0.003317564 |
| ATT>ACT | 0.003408848 |
| CTA>CCA | 0.006473984 |
| CTC>CCC | 0.009982651 |
| CTG>CCG | 0.008871106 |
| CTT>CCT | 0.01454855  |
| GTA>GCA | 0.002571098 |
| GTC>GCC | 0.009870109 |
| GTG>GCG | 0.001700346 |
| GTT>GCT | 0.002077657 |
| TTA>TCA | 0.00456193  |
| TTC>TCC | 0.003657906 |
| TTG>TCG | 0.001961637 |
| TTT>TCT | 0.002185522 |
| ATA>AGA | 0.002837065 |
| ATC>AGC | 0.001783529 |
| ATG>AGG | 0.004379581 |
| ATT>AGT | 0.001849858 |
| CTA>CGA | 0.00262128  |
| CTC>CGC | 0.002812001 |
| CTG>CGG | 0.005300296 |
| CTT>CGT | 0.003160225 |
| GTA>GGA | 0.001186192 |
| GTC>GGC | 0.005022697 |
| GTG>GGG | 0.007821102 |

|         |             |
|---------|-------------|
| GTT>GGT | 0.001775102 |
| TTA>TGA | 0.00313576  |
| TTC>TGC | 0.002073962 |
| TTG>TGG | 0.004483479 |
| TTT>TGT | 0.003032136 |

#Supplemental Table S3: Consensus cisplatin DNS signature; weighted average of the 6 MCF 10A clones and the 4 HepG2 clones.

AC>CA 0.001192677  
AC>CG 0  
AC>CT 0.000577034  
AC>GA 0  
AC>GG 0  
AC>GT 0  
AC>TA 0.001154068  
AC>TG 0  
AC>TT 0.002058228  
AT>CA 0  
AT>CC 0  
AT>CG 0  
AT>GA 0.000577034  
AT>GC 0  
AT>TA 0.000577034  
CC>AA 0.102979447  
CC>AG 0.041684709  
CC>AT 0.06126526  
CC>GA 0.001933273  
CC>GG 0.000740597  
CC>GT 0.004654881  
CC>TA 0.011647375  
CC>TG 0.004857051  
CC>TT 0.005597647  
CG>AT 0.002798824  
CG>GC 0  
CG>GT 0.002962387  
CG>TA 0  
CG>TC 0.000288517  
CG>TT 0.001029114  
CT>AA 0.131921669  
CT>AC 0.096527465  
CT>AG 0.009377847  
CT>GA 0.005597648  
CT>GC 0.001356239  
CT>GG 0.004318625  
CT>TA 0.012301625  
CT>TC 0.006828931  
CT>TG 0.007569529  
GC>AA 0.027468072  
GC>AG 0.006174682  
GC>AT 0.008569164  
GC>CA 0.004607142  
GC>CG 0  
GC>TA 0.001894665



TA>AT 0.005511301  
TA>CG 0  
TA>CT 0.001644756  
TA>GC 0  
TA>GG 0  
TA>GT 0.00222179  
TC>AA 0.08924228  
TC>AG 0.036230277  
TC>AT 0.080279992  
TC>CA 0.003087341  
TC>CG 0.001606148  
TC>CT 0.005434085  
TC>GA 0.002923779  
TC>GG 0  
TC>GT 0.009386977  
TG>AA 0.010329744  
TG>AC 0.004693489  
TG>AT 0.050735432  
TG>CA 0.003289512  
TG>CC 0.00045208  
TG>CT 0.010445568  
TG>GA 0.002058227  
TG>GC 0.001606148  
TG>GT 0.098365261  
TT>AA 0.005434085  
TT>AC 0.00045208  
TT>AG 0.000740597  
TT>CA 0.00045208  
TT>CC 0  
TT>CG 0  
TT>GA 0.000288517  
TT>GC 0  
TT>GG 0

Supplemental Table S4: Variant allele frequencies of SNSs and DNSs in cisplatin positive HCCs.

|       | SNSs   |       | DNSs   |       | CC>AA DNSs |       |
|-------|--------|-------|--------|-------|------------|-------|
|       | median | sd    | median | sd    | median     | sd    |
| RK028 | 37.8%  | 11.5% | 36.7%  | 11.2% | 38.3%      | 11.3% |
| RK056 | 36.4%  | 12.9% | 35.7%  | 12.6% | 35.8%      | 10.7% |
| RK072 | 37.5%  | 17.4% | 32.7%  | 17.5% | 39.1%      | 18.3% |
| RK074 | 45.5%  | 17.1% | 41.0%  | 16.7% | 42.5%      | 17.7% |
| RK140 | 22.7%  | 8.2%  | 22.1%  | 9.1%  | 20.0%      | 6.6%  |
| RK205 | 33.3%  | 16.7% | 28.6%  | 13.3% | 27.4%      | 21.2% |
| RK241 | 36.8%  | 12.0% | 31.2%  | 10.3% | 30.6%      | 11.9% |
| RK256 | 44.1%  | 12.8% | 44.6%  | 12.4% | 40.9%      | 10.5% |
